# Allelic compatibility in plant immune receptors facilitates engineering of new effector recognition specificities

Adam R. Bentham<sup>1\*</sup>, Juan Carlos De la Concepcion<sup>1,2\*</sup>, Javier Vega Benjumea<sup>1,3</sup>, Sally Jones<sup>1</sup>, Melanie Mendel<sup>1,4</sup>, Jack Stubbs<sup>1,5,6</sup>, Clare E. M. Stevenson<sup>1</sup>, Josephine H.R. Maidment<sup>1,7,8</sup>, Mark Youles<sup>7</sup>, Jiorgos Kourelis<sup>7</sup>, Rafał Zdrzałek<sup>1</sup>, Sophien Kamoun<sup>7</sup>, Mark J. Banfield<sup>1#</sup>

<sup>1</sup>Department of Biochemistry and Metabolism, John Innes Centre, Norwich Research Park, Norwich, NR4 7UH, UK

<sup>2</sup>Current address: Gregor Mendel Institute of Molecular Plant Biology, Austrian Academy of Sciences, Vienna, 1030, Austria

<sup>3</sup>Current address: Servicio de bioquímica y análisis clínicos, Hospital Universitario Puerta de Hierro, Majadahonda, 28222, Spain

<sup>4</sup>Current address: Department of Biology, Plant-Microbe Interactions, Utrecht University, 3584CH, Utrecht, The Netherlands

<sup>5</sup>Current address: Biological Sciences, Institute for Life Sciences, University of Southampton, Hartley Library B12, University Rd, Highfield, Southampton SO17 1BJ, UK

<sup>6</sup>Current address: Diamond Light Source, Harwell Science and Innovation Campus, Fermi Ave, Didcot OX11 0DE, UK

<sup>7</sup>The Sainsbury Laboratory, University of East Anglia, Norwich Research Park, Norwich, NR4 7UH, UK

<sup>8</sup>Current affiliation: 2Blades, Evanston, IL 60201, USA

\* These authors contributed equally.

# Corresponding author, email: [mark.banfield@jic.ac.uk](mailto:mark.banfield@jic.ac.uk)

## ORCID IDs

|                               |                     |
|-------------------------------|---------------------|
| Adam R. Bentham:              | 0000-0001-5906-0962 |
| Juan Carlos De la Concepcion: | 0000-0002-7642-8375 |
| Sally Jones:                  | 0000-0002-0013-8865 |
| Javier Vega Benjumea:         | 0000-0002-3988-1656 |
| Melanie Mendel:               | 0000-0003-2409-7479 |
| Jack Stubbs:                  | 0000-0002-3788-1687 |
| Clare E. M. Stevenson:        | 0000-0001-6695-8201 |
| Josephine H.R. Maidment:      | 0000-0002-8229-2718 |
| Jiorgos Kourelis:             | 0000-0002-9007-1333 |
| Rafał Zdrzałek:               | 0000-0003-3669-924X |
| Sophien Kamoun:               | 0000-0002-0290-0315 |
| Mark J. Banfield:             | 0000-0001-8921-3835 |

## 1 **Summary**

2 Engineering expanded effector recognition in plant immune receptors is a promising prospect for  
3 generating new disease resistant crop varieties. However, modification of plant NLR receptors has  
4 proven challenging due to the lack of understanding of their context as part of complex immune  
5 systems. Here, we demonstrate a new avenue for NLR-mediated engineering that exploits the allelic  
6 diversity in the Pik NLR pair to allow for the generation of receptors with expanded recognition  
7 specificities, which would otherwise result in constitutive cell death. This work lays the foundation  
8 for the incorporation of new effector recognition motifs into the Pik system and advances the  
9 development of designer NLRs that can be tailored to specific secreted pathogen signatures.

## **Abstract**

10 Engineering the plant immune system offers genetic solutions to mitigate crop diseases caused by  
11 diverse agriculturally significant pathogens and pests. Modification of intracellular plant immune  
12 receptors of the nucleotide-binding leucine rich repeat (NLRs) superfamily for expanded recognition  
13 of pathogen virulence proteins (effectors) is a promising approach for engineering novel disease  
14 resistance. However, engineering can cause NLR autoactivation, resulting in constitutive defence  
15 responses that are deleterious to the plant. This may be due to plant NLRs associating in highly  
16 complex signalling networks that co-evolve together, and changes through breeding or genetic  
17 modification can generate incompatible combinations, resulting in autoimmune phenotypes. We  
18 have previously shown how alleles of the rice NLR pair Pik have differentially co-evolved, and how  
19 sensor/helper mismatching between non-co-evolved alleles triggers constitutive activation and cell  
20 death (De la Concepcion et al., 2021b). Here, we dissect incompatibility determinants in the Pik pair  
21 and found that HMA domains integrated in Pik-1 not only evolved to bind pathogen effectors but  
22 also likely co-evolved with other NLR domains to maintain immune homeostasis. This explains why  
23 changes in integrated domains can lead to autoactivation. We then used this knowledge to facilitate  
24 engineering of new effector recognition specificities overcoming initial autoimmune penalties. We  
25 show that by mismatching alleles of the rice sensor and helper NLRs Pik-1 and Pik-2, we can enable

26 the integration of synthetic HMA domains with novel and enhanced recognition of an effector from  
27 the rice blast fungus. Taken together, our results reveal a new strategy for engineering NLRs, which  
28 has the potential to allow an expanded set of integrations and therefore new disease resistance  
29 specificities in plants.

## Introduction

30 Engineering the plant immune system is a promising genetic solution to prevent pathogen infection  
31 thereby reducing crop losses and global food insecurity caused by plant pathogens (Bentham et al.,  
32 2020; Outram et al., 2022). Nucleotide-binding leucine rich repeat receptors (NLRs) are intracellular  
33 immune proteins that trigger robust defence responses upon recognition of pathogen virulence  
34 proteins (effectors) delivered into the host during infection (Burdett et al., 2019; Jones et al., 2016).  
35 Effector recognition by NLRs often culminates in cell death that isolates the invading pathogen and  
36 confers resistance (Jones et al., 2016; Maruta et al., 2022). Due to their effective and specific responses  
37 to plant pathogens, engineering of NLRs to increase their effector recognition specificities is a  
38 promising approach to boost disease resistance (Marchal et al., 2022; Monteiro and Nishimura, 2018;  
39 Outram et al., 2022).

40 NLRs are typically modular tripartite proteins that consist of an N-terminal signalling domain,  
41 either a coiled-coil (CC) domain, a CC domain with homology to RPW8 (CC<sub>R</sub>) or Toll-interleukin-1  
42 receptor (TIR) domain, a central nucleotide-binding (NB) domain, and a C-terminal leucine rich  
43 repeat (LRR) domain (Jones et al., 2016; Lüdke et al., 2022; Takken and Goverse, 2012). NLR proteins  
44 can function as singletons, pairs and in networks, and utilize several mechanisms to detect and  
45 respond to pathogen effectors (Adachi et al., 2019; Cesari, 2018; Wu et al., 2018). One such  
46 mechanism is the use of integrated domains, which function as effector baits embedded within the  
47 canonical NLR architecture (Baggs et al., 2017; Cesari et al., 2014). Integrated domains often share  
48 homology to pathogen host targets and effector binding results in NLR activation (Białas et al., 2018;  
49 Cesari, 2018; Kroj et al., 2016; Sarris et al., 2016). Due to their role in effector recognition, integrated  
50 domains are key targets for engineering disease resistance in NLRs and only a few mutations to  
51 these domains can lead to novel effector recognition profiles (Cesari et al., 2022; De la Concepcion  
52 et al., 2019; Liu et al., 2021; Maidment et al., 2022; Zhang et al., 2022).

53 Most characterised NLRs that contain integrated domains (NLR-IDs) are found as a part of a  
54 sensor/helper receptor pair, where the NLR-ID is referred to as the sensor, and its signalling partner,

55 the helper (Adachi et al., 2019; Cesari, 2018; Feehan et al., 2020). Some of the best characterised  
56 examples of paired NLRs are the Arabidopsis RRS1/RPS4 pair which encodes an RRS1-integrated  
57 WRKY domain (Le Roux et al., 2015; Mukhi et al., 2021; Zhang et al., 2017) and the rice NLR pairs  
58 RGA5/RGA4 and Pik-1/Pik-2 (Cesari et al., 2013; Kanzaki et al., 2012; Zdrzałek et al., 2020). The  
59 RGA5/RGA4 and Pik pairs harbour an integrated HMA domain in their sensor NLRs RGA5 and  
60 Pik-1 that directly bind and recognise MAX (*M. oryzae* avirulence and ToxB-like) effectors (Guo et  
61 al., 2018; Maqbool et al., 2015). While both RGA5 and Pik-1 contain an integrated HMA domain,  
62 their domain architecture is distinct with the Pik-1 HMA domain located between the CC and NB  
63 domains, and the RGA5 HMA domain located at the C-terminus, after the LRR (Cesari et al., 2013;  
64 Kanzaki et al., 2012; Maqbool et al., 2015; Ortiz et al., 2017). Further, these HMA domains provide  
65 distinct effector recognition specificities for AVR-Pik, AVR-Mgk1, and AVR-Pia/AVR1-CO39  
66 effectors respectively (Bialas et al., 2018; Sugihara et al., 2022).

67 The HMA domains of Pik-1 and RGA5 use spatially distinct protein interfaces for effector  
68 recognition (De la Concepcion et al., 2021a, 2018; Guo et al., 2018; Varden et al., 2019). Recent studies  
69 have reported HMA domain engineering to be an effective way to generate new resistance  
70 specificities for rice against the rice blast pathogen *M. oryzae*. In particular, three separate studies  
71 have shown the RGA5 HMA domain can be engineered to recognise other MAX effectors. One study  
72 showed engineered resistance to *M. oryzae* isolates carrying AVR-Pib in rice (Liu et al., 2021), and  
73 two studies engineered recognition of AVR-Pik in *N. benthamiana*, one of which was able to provide  
74 resistance in rice (Cesari et al., 2022; Zhang et al., 2022). Extensive study of the Pik-1 HMA domain  
75 has also demonstrated this HMA domain to be amenable to engineering (De la Concepcion et al.,  
76 2021a, 2019; Maidment et al., 2022). Recently, it has been shown the Pik-1 HMA can be substituted  
77 for VHH nanobody fusions that act as synthetic effector recognition domains, demonstrating the  
78 flexibility of the Pik system for mutation or substitution of new integrated domains (Kourelis et al.,  
79 2021).

80 Despite some success, plant immune receptor engineering remains challenging. NLRs exist in  
81 complex, regulated systems and as a consequence some changes in NLRs that expand recognition  
82 can also result in constitutive defence signalling that is deleterious for plant growth (Bialas et al.,  
83 2021; Maidment et al., 2022; Tamborski et al., 2022). NLR-mediated autoimmunity has been well  
84 documented, with hybrid necrosis phenotypes as a result of crosses linked to incompatible pairing  
85 of NLRs (Bomblies et al., 2007; Chae et al., 2014; Kourelis and Adachi, 2022; Tran et al., 2017),  
86 presenting a bottleneck to producing new resistant crop varieties either by breeding or precision  
87 protein engineering.

88 Recently, we demonstrated alleles of the rice Pik NLR pair have differentially co-evolved, likely  
89 driven by their differences in recognition specificity for *Magnaporthe oryzae* AVR-Pik effector  
90 variants (De la Concepcion et al., 2021b). The Pik alleles Pikip and Pikm have undergone functional  
91 diversification, with multiple changes in their integrated HMA domain that result in different  
92 recognition specificities for AVR-Pik variants (Bialas et al., 2021; De la Concepcion et al., 2021).  
93 Where the Pikip-1 sensor is restricted to detecting AVR-PikD, Pikm-1 is able to recognise AVR-PikD,  
94 AVR-PikE and AVR-PikA (De la Concepcion et al., 2018; Kanzaki et al., 2012). The helper NLRs Pikip-  
95 2 and Pikm-2 also appear to have undergone diversification to match their sensor partners that  
96 results in a one-way incompatibility between Pik alleles (De la Concepcion et al., 2021b). While Pikip-  
97 2 can be used as a helper with Pikm-1 to recognise AVR-Pik, the Pikip-1/Pikm-2 combination results  
98 in constitutive cell death in *N. benthamiana*. This incompatibility between Pikip-1 and Pikm-2 is linked  
99 to a single polymorphism in the NB-ARC of Pikm-2, which when mutated to the equivalent residue  
100 of Pikip-2 reinstates compatibility (De la Concepcion et al., 2021b).

101 Here, we demonstrate the autoactivity triggered by the engineering of Pikm-1 for expanded effector  
102 recognition capabilities can be attenuated by the co-expression with Pikip-2 without compromising  
103 receptor function. For this, we delineate the basis for receptor incompatibility between Pikip and  
104 Pikm alleles, describing Pikip-2 as a facilitator for integration of new integrated domains into Pikm-  
105 1. By mismatching Pikm-1 with Pikip-2, we can integrate the RGA5 HMA domain into Pikm-1,

106 enabling further engineering of RGA5 HMA to recognise multiple AVR-Pik variants. Finally, we  
107 structurally and biophysically characterise the interaction between a synthetic AVR-Pik-binding  
108 mutant of RGA5 HMA and AVR-Pik effectors, highlighting the importance of binding affinity  
109 between effector and bait for immune recognition. These results emphasize the importance of tuning  
110 receptor pairs in engineering and supplies a novel approach to NLR engineering that will aid in the  
111 implementation of modified immune receptors with expanded effector recognition specificities  
112 outside of that previously observed in nature.

## Results

### 113 **The Pik-HMA domain is not required for effector-independent immune signalling.**

114 Mismatched pairing of the Pikp-1/Pikm-2 alleles triggers constitutive cell death in the absence of an  
115 effector binding to the integrated HMA domain (De la Concepcion et al., 2021b). To better assess the  
116 role of the Pik HMA domain in signalling, activation and autoimmunity outside of effector binding,  
117 we used an HMA-absent Pikp-1 variant (Pikp-1<sup>ΔHMA</sup>) where the HMA domain of Pikp-1 was  
118 substituted with the unrelated NOI domain from the rice NLR Pii-2 (Pii-2 residues Glu1016 to  
119 Lys1052) (Fujisaki et al., 2017). Constitutive cell death was observed upon co-expression of Pikp-  
120 1<sup>ΔHMA</sup> with Pikm-2 in *N. benthamiana*. However, like wildtype Pikp-1, co-expression of Pikp-1<sup>ΔHMA</sup>  
121 with Pikp-2 did not result in cell death (**Figure 1 - Appendix 1A**). Then we found autoactivity  
122 induced by co-expression of Pikp-1<sup>ΔHMA</sup>/Pikm-2 is determined by the Pik-2 Asp230Glu  
123 polymorphism (Pikp-2<sup>D230E</sup>/Pikm-2<sup>E230D</sup>) (**Figure 1 - Appendix 1A**) as described for wildtype Pik  
124 NLRs (De la Concepcion et al., 2021b). An Asp230Glu mutation into Pikp-2 resulted in constitutive  
125 activation when co-expressed with Pikp-1<sup>ΔHMA</sup>, and the reciprocal mutation, Glu230Asp, in Pikm-2  
126 abolished autoactivity (**Figure 1 - Appendix 1A**). This suggests the integrated HMA domain acts  
127 as an effector binding domain but is not required for downstream NLR signalling and cell death.

### 128 **Incompatibility between alleles of the Pik NLR pair is linked to regions within the sensor and** 129 **the helper.**

130 As the integrated HMA is not required for immune activation of the Pik pair, and is the most variable  
131 domain between the Pikp-1 and Pikm-1 alleles (Costanzo and Jia, 2010), we hypothesised the Pikm-  
132 HMA domain co-evolved with Pikm-2 to suppress autoactivation mediated by Pik-2 Asp230Glu  
133 polymorphism. To test this, we exchanged the integrated HMA domains between sensor alleles  
134 Pikp-1 (pHMA) and Pikm-1 (mHMA), to create Pikp-1<sup>mHMA</sup> and Pikm-1<sup>pHMA</sup>. Pikp-1<sup>mHMA</sup> and Pikm-  
135 1<sup>pHMA</sup> were co-expressed in *N. benthamiana* with either the Pikp-2 or Pikm-2 helper and challenged  
136 with AVR-PikD or mCherry to test for effector activation and autoimmunity, respectively (**Figure 2**  
137 **A, Figure S1 A - Appendix 1 B**). Expression of the Pikm-1<sup>pHMA</sup> with Pikm-2 resulted in effector-



138 independent cell death; however, this sensor was not autoactive in the presence of Pikp-2 and was  
139 able to respond to AVR-PikD. By contrast, Pikp-1<sup>mHMA</sup> was not autoactive when co-expressed with  
140 either the Pikp-2 or Pikm-2 helpers and cooperated with either helper to respond to AVR-PikD.  
141 These data demonstrate the integrated domain of the Pik-1 sensor contributes to the compatibility  
142 between the Pik sensor and helper NLRs.

143 To gain a better understanding of which features of the HMA domain are involved in sensor/helper  
144 compatibility, we generated chimeras by introducing secondary structures from the Pikp-1 HMA  
145 into the Pikm-1 HMA and tested for autoactivation in the presence of Pikm-2. The Pik HMA  
146 maintains a four-strand  $\beta$ -sandwich fold ( $\beta 1 - \beta 4$ ) flanked by two helices ( $\alpha 1$  and  $\alpha 2$ ) (De la  
147 Concepcion et al., 2018). For this experiment we generated six chimeric sensors: Pikm-1 $\beta 1$ , Pikm-1 $\alpha 1$ ,  
148 Pikm-1 $\beta 2$ , Pikm-1 $\beta 3$ , Pikm-1 $\alpha 2$ , and Pikm-1 $\beta 4$ , and these were co-expressed with Pikm-2 and AVR-  
149 PikD or mCherry in *N. benthamiana* (**Figure 2 B, Figure S1 B - Appendix 1 C**). Of the six mutants,  
150 only Pikm-1 $\beta 1$ , Pikm-1 $\alpha 2$ , and Pikm-1 $\beta 4$  resulted in effector-independent cell death. However, not all  
151 the residues of the  $\beta 1$  and  $\beta 4$  strands make significant contributions to the AVR-Pik binding interface  
152 of the HMA (**Figure 2 C, Figure S2, Figure S3 - Appendix 1 D-F**), implying that some residues not  
153 directly involved in the binding to the effector can have a regulatory role in NLR activation.

154 Following the observation that the  $\beta 1$ ,  $\alpha 2$ , and  $\beta 4$  HMA secondary structures may be involved in  
155 helper incompatibility, we created single point mutations of the polymorphic residues between Pikp  
156 and Pikm HMA domains in these secondary structures (**Figure S2, Figure S3 - Appendix 1 D-F**) to  
157 assess their individual contributions to sensor/helper compatibility. When co-expressed in *N.*  
158 *benthamiana*, few of the Pikm-1 mutants influenced compatibility with Pikm-2 in contrast to our  
159 observations with the  $\alpha 2$ ,  $\beta 1$ , and  $\beta 4$  chimeras, which points towards a certain threshold for change  
160 in the HMA being tolerated by the system (**Figure S2, Figure S3 - Appendix 1 D-F**). Notable  
161 exceptions to this were the deletion of Gly186 in  $\beta 1$  and the Pro252Asp substitution in  $\beta 4$ , which  
162 resulted in strong autoactivity in the presence of Pikm-2. Why these two mutations result in such  
163 strong autoactivity is unclear, but could be related to both causing large-scale structural changes, as

164 the removal of a residue ( $\Delta$ G186) or mutation of a proline (Pro252) could impact secondary structure  
165 formation and affect the ability of the mHMA to prevent autoactivity in the presence of Pikm-2.

166 Taken together, these data demonstrate elements of the Pik-1 sensor and Pik-2 helper contribute to  
167 receptor compatibility, as the HMA domain is not required for cell death signalling but has evolved  
168 to accommodate for changes in Pik-2 that would otherwise result in constitutive activation.

169 **Integration of the RGA5 HMA domain into Pik-1 is facilitated by allelic mismatching.**

170 Our results also suggest Pikp-2 may be more accommodating of changes in the Pik-1 sensor than  
171 Pikm-2, even tolerating the complete substitution of the integrated HMA by an unrelated domain  
172 without inducing autoactivity. We hypothesised the ability of Pikp-2 to accommodate changes in  
173 the integrated domain would allow for integration of an HMA domain that would normally result  
174 in autoactivity. To test this, we made a chimera of Pikm-1 carrying the HMA domain from the rice  
175 NLR RGA5. Using multiple sequence alignment and structural visualisation in ChimeraX (Pettersen  
176 et al., 2021), we defined residues 997 – 1071 from the RGA5 HMA to be the identical boundaries of  
177 the Pikm-1 HMA domain. It was important to make sure the size of the HMA incorporated into the  
178 Pikm-1 chassis was identical to the Pikm-1 HMA due to our previous observation that removal of a  
179 single residue from the HMA ( $\Delta$ G186) resulted in strong autoactivity.

180 Co-expression of the Pikm-1<sup>RGA5</sup> chimera with Pikm-2 in *N. benthamiana* resulted in a strong effector-  
181 independent cell death response. However, no cell death was observed upon co-expression of Pikm-  
182 1<sup>RGA5</sup> with Pikp-2 (**Figure 3 – Appendix 1 G**). Therefore, the Pikp-2 helper allows the integration of  
183 the RGA5 HMA into Pikm-1. To test whether the Pikm-1<sup>RGA5</sup> chimera is a functional receptor, the  
184 Pikm-1<sup>RGA5</sup>/Pikp-2 combination was co-expressed with AVR-Pia. Co-expression of Pikm-1<sup>RGA5</sup>,  
185 Pikp-2 and AVR-Pia in *N. benthamiana* resulted in weak cell death, significantly weaker than the cell  
186 death elicited by RGA4/RGA5 in response to AVR-Pia (**Figure 3 – Appendix 1 G**), but comparable  
187 to the cross-reactivity of Pikp-1/Pikp-2 with AVR-Pia previously observed in *N. benthamiana*  
188 (Varden et al., 2019). Furthermore, we sought determine whether the RGA5 HMA integrated into

189 Pikm-1 could complement the function of the Pikm-1 HMA and respond to AVR-PikD (**Figure S4 -**  
190 **Appendix 1 H**). Co-expression of Pikm-1<sup>RGA5</sup>/Pikp-2 with AVR-PikD did not trigger a cell death  
191 response in *N. benthamiana*, demonstrating the RGA5 HMA cannot substitute the Pikm-1 HMA as  
192 an AVR-Pik recognition module when integrated into Pikm-1.

193 These data demonstrate the Pikp-2 helper can be used to facilitate the integration of new domains  
194 into the Pikm-1 sensor that would otherwise result in autoactivity/incompatibility when paired  
195 with Pikm-2.

#### 196 **The RGA5 HMA domain can be engineered to recognise AVR-Pik from within the Pik-1 chassis.**

197 To test whether the RGA5 HMA can act as an effector recognition module in the Pikm-1 receptor,  
198 we engineered AVR-Pik recognition in the RGA5 HMA. Using a host target of AVR-Pik, OsHIP19  
199 (Maidment et al., 2021) as a structural template for AVR-Pik binding we generated an RGA5 variant,  
200 termed the AVR-Pik binding (APB) mutant (**Figure S5**). The APB mutant contains the point  
201 mutations Glu1033Asp, Val1039Gln, Met1065Gln, Leu1068Glu, Glu1070Lys, and Lys1071Glu that  
202 localise to a potential AVR-Pik binding interface of the RGA5 HMA. Next, we generated a Pikm-1  
203 chimera containing the RGA5-APB mutant HMA (Pikm-1<sup>APB</sup>) and co-expressed it with Pikp-2 and  
204 the AVR-Pik variants AVR-PikD, AVR-PikC and AVR-PikF in *N. benthamiana*. The Pikm-1<sup>APB</sup>  
205 chimera was able to trigger cell death in response to AVR-PikD, AVR-PikC and AVR-F (**Figure 4 A,**  
206 **B - Appendix 1 I**). We also tested whether Pikm-1<sup>APB</sup> could recognise AVR-Pia. However, as for the  
207 Pikm-1<sup>RGA5</sup> chimera, we only observed a weak cell death response (**Figure 4 A, B - Appendix 1 I**).

208 To observe whether cell death correlates with effector binding in planta, we performed co-  
209 immunoprecipitation (co-IP) assays with FLAG-tagged Pikm-1<sup>APB</sup> and 4xMYC tagged AVR-PikD,  
210 AVR-PikC, AVR-PikF, AVR-Pia, and PWL2 as negative control. We observed bands corresponding  
211 to AVR-PikD, AVR-PikC and AVR-PikF in Pikm-1<sup>APB</sup> samples after FLAG pulldown, whereas only  
212 AVR-PikD was pulled down by wildtype Pikm-1 (**Figure 4 C**). Correlating with the weak response  
213 in cell death assays, we were unable to observe association between Pikm-1<sup>APB</sup> and AVR-Pia.

214 Taken together, these data demonstrate the RGA5 HMA domain can be engineered to respond to  
215 AVR-Pik in planta in the context of the Pikm-1 receptor. However, incorporation of the RGA5 HMA  
216 in the Pikm-1 chassis is not sufficient for robust recognition of AVR-Pia.

217 **The affinity of HMA domains for effectors underpins recognition phenotypes in Pik-1 chimeras.**

218 We hypothesized a lower affinity of the APB HMA for AVR-Pia compared to AVR-Pik is responsible  
219 for the differences in cell death phenotypes. The interaction between AVR-Pia/RGA5-HMA is  
220 known to be much weaker when compared with AVR-Pik/Pik-HMA (De la Concepcion et al., 2018;  
221 Guo et al., 2018; Ortiz et al., 2017). To investigate this, we performed surface plasmon resonance  
222 (SPR) to determine affinities of the RGA5, Pikm-1 and APB HMA domains for different MAX  
223 effectors.

224 We purified AVR-PikD, AVR-PikC, AVR-PikF, AVR-Pia and the non-MAX effector AVR-Pii as  
225 previously described (De la Concepcion et al., 2022, 2018) (See materials and methods) and  
226 performed multicycle kinetics by flowing the effectors over a Biacore CM5 chip presenting amine-  
227 coupled RGA5, APB and Pikm-1 HMA domains (**Figure S6, Table S1**). As in previous reports, we  
228 observed strong binding of AVR-PikD to the Pikm-1 HMA (equilibrium dissociation constant ( $K_D$ )  
229 = ~10 nM) (De la Concepcion et al., 2018) and very low binding to RGA5 HMA (Cesari et al., 2022;  
230 Zhang et al., 2022) (**Figure 4 D, Figure S6**); neither the Pikm-1 HMA or RGA5 demonstrated any  
231 strong binding to AVR-PikC or AVR-PikF, as characterised by their rapid dissociation from the  
232 HMA (**Figure S6 A, Table S1**). Due to the weak binding of AVR-Pia to the HMAs relative to the  
233 Pikm-1/AVR-PikD interaction, higher concentrations (up to 50  $\mu$ M) of AVR-Pia were flowed over  
234 the chip, which allowed us to measure the affinity of AVR-Pia for the RGA5 and APB HMAs at 26.8  
235 and 32.9  $\mu$ M, respectively (**Figure S6**). These values are in agreement with previous studies that have  
236 reported micromolar affinities between the RGA5 HMA and AVR1-CO39 and AVR-Pia effectors  
237 using isothermal titration calorimetry (ITC) or microscale thermophoresis (MST) (Guo et al., 2018;  
238 Liu et al., 2021; Ortiz et al., 2017; Zhang et al., 2022). Interestingly, the affinity of the interaction  
239 between RGA5 HMA and AVR-Pia is similar to the affinities observed for the interaction between

240 RGA5 HMA and AVR-PikD, or Pikm-1 HMA and AVR-PikC/AVR-PikF, which do not result in  
241 resistance in planta. A key similarity between these weaker HMA/effector interactions is the rapid  
242 dissociation rate of the effector from the HMA, indicative that the RGA5 HMA alone can facilitate,  
243 but not maintain, binding of the effector in vitro. This observation is particularly evident when  
244 compared to the binding of Pikm-1 to AVR-PikD in which the dissociation rate is considerably  
245 slower (**Figure S6**).

246 We observed high binding affinity of AVR-PikD, AVR-PikC and AVR-PikF for the APB mutant  
247 (**Figure 4 D**). As the effector does not dissociate appreciably from the HMA over the time of the  
248 experiment, we were unable to accurately calculate binding using multicycle kinetics (**Figure S7**).  
249 Therefore, to quantify the affinity between the APB and AVR-Pik effectors, we used single-cycle  
250 kinetics with a long dissociation phase, which allowed us to calculate a  $K_D$  of 0.31 nM, 2.95 nM, and  
251 16.50 nM for AVR-PikD, AVR-PikC, and AVR-PikF respectively (**Figure 4 D, Table S1**).

252 The engineered APB mutant can bind AVR-Pik effectors with nanomolar affinity, and this strong  
253 binding correlates with the effector association and cell death response observed for Pikm-1<sup>APB</sup> in  
254 planta. By contrast, AVR-Pia rapidly dissociates from all HMA domains, and this is correlated with  
255 weak/no response with Pikm-1<sup>APB</sup> and Pikm-1<sup>RGA5</sup> chimeras in planta. Taken together, these data  
256 suggest binding affinity to the HMA domain is key to recognition in the Pik system, with high  
257 affinity interfaces being essential for initiating a cell death response.

#### 258 **The structural basis for interaction between the RGA5-APB HMA mutant and AVR-Pik.**

259 The Pikm-1 HMA and RGA5 HMA domains are essential for recognition of MAX effectors in their  
260 respective NLRs, however they have spatially distinct effector binding interfaces (De la Concepcion  
261 et al., 2018; Guo et al., 2018; Ortiz et al., 2017).

262 As the effector recognition interfaces of RGA5 and Pikm-1 HMA domains are different, we  
263 determined a crystal structure of the complex between the APB mutant and AVR-PikF, to validate  
264 our structural modelling of the RGA5 HMA and confirm we had engineered an AVR-Pik/Pik-HMA-

265 like interface into RGA5 HMA. Using analytical gel filtration, we observed a peak shift after  
266 incubating purified AVR-PikF and APB proteins, indicative of stable complex formation (**Figure 5**  
267 **A**). Following this, we used a co-expression approach to purify an APB/ AVR-PikF complex, which  
268 was used to obtain crystals via sparse matrix screening (**Figure S8**). X-ray diffraction data were  
269 collected at the Diamond Light Source, Oxford, resulting in a 1.3Å dataset (**Table S2**) (**See details**  
270 **of crystallization and structure solution in materials and methods**). The APB/ AVR-PikF complex  
271 shares the same interface as Pikm-1 HMA/ AVR-PikD and OsHIPP19/ AVR-PikF complexes.  
272 Structural alignment of these complexes results in an R.M.S.D. of 0.51 Å and 0.39 Å, respectively  
273 (**Figure 5 B, D; Figure S9**). As predicted, each of the six mutations in the RGA5 HMA generated to  
274 facilitate AVR-Pik binding are located at the effector interface (**Figure 5 B; Figure S10**). These  
275 mutations are sufficient to generate an AVR-Pik binding interface in the RGA5 HMA distinct from  
276 that observed for AVR-Pia/ AVR1-CO39 (**Figure 5 C**).

## Discussion

277 Constitutive immune activation by the combination of incompatible NLRs through breeding or  
278 genetic engineering (hybrid necrosis) presents a bottleneck in plant breeding and evolution (Calvo-  
279 Baltanás et al., 2021; Chae et al., 2014; Ordon et al., 2021; Tran et al., 2017). Likewise, autoactivity due  
280 to engineering presents a bottleneck to strategies for NLR-mediated pathogen resistance (Kourelis  
281 et al., 2021; Maidment et al., 2021; Tamborski et al., 2022). The work presented here highlights the  
282 importance of factors outside of enhancing effector binding, such as considering the context of NLRs  
283 that act in pairs or networks, for the generation of new recognition specificities and NLR  
284 combinations without penalties imposed by constitutive immune activation.

285 **The helper allele Pikp-2 can accommodate for changes in the integrated domain of Pik-1 without**  
286 **triggering effector-independent cell death.**

287 We previously reported on the incompatibility of the Pikp and Pikm alleles (De la Concepcion et al.,  
288 2021b), highlighting the functional diversification of the Pik receptor pair and linking the  
289 specialisation of the Pik-2 receptor for its cognate sensor to an Asp230Glu polymorphism in the NB  
290 domain. Here we demonstrated the role of the HMA domain in compatibility of the Pik-1 sensor  
291 with Pik-2 the helper. When we introduced the HMA domain from Pikp-1 into Pikm-1 we observed  
292 autoactivity with Pikm-2 but not Pikp-2. Pikp-2<sup>D230E</sup> and Pikm-2<sup>E230D</sup> mutants, which flip the  
293 specialisation of each helper, swapped the compatibility of Pik-2 for Pik-1 mutants/chimeras.

294 Studies involving the swap of the Pikp integrated HMA for a non-co-evolved ancestral version  
295 (Białas et al., 2021) or the equivalent HMA domain of OsHIP19 (Maidment et al., 2022) also showed  
296 that this caused autoimmunity, which was removed by mutation of the HMA outside of the effector  
297 binding interface, further supporting a mechanism for co-adaptation of the integrated HMA domain  
298 with other domains in the sensor Pik-1 and the helper Pik-2. This co-adaptation may have led to  
299 different thresholds of the helpers for the sensors. As such, we observe Pikp-2 to be more permissive  
300 of changes in the Pik-1 compared to Pikm-2.

301 Specific Pik pair combinations are more tolerant to changes in the integrated domain, facilitating  
302 engineering of expanded recognition that would otherwise result in constitutive cell death. By  
303 considering the context of the engineered receptor domain within the NLR pair, we present a novel  
304 approach to circumventing autoactive immune responses that can limit the potential of NLR  
305 engineering for novel disease resistance.

### 306 **Allelic mismatching provides new avenues for engineering disease resistance.**

307 The mismatching strategy reported here opens exciting avenues for the incorporation of new effector  
308 recognition motifs into the Pik system, and perhaps other paired NLR systems. Combining the  
309 Pikm-1 sensor with the Pikp-2 helper yielded a compatible receptor pair with greater ability to  
310 accept HMA modifications than the natural pairing of the Pikp-1/Pikp-2 or Pikm-1/Pikm-2 alleles.  
311 Mismatching of the Pik sensor/helper alleles allowed incorporation of the RGA5 HMA into the  
312 Pikm-1 backbone, without autoactivity. Notably, this strategy could be useful in areas such as the  
313 incorporation of VHH-nanobody fusions into Pikm-1 to allow for tailor-made NLRs (Kourelis et al.,  
314 2021). Indeed, in this study several Pikm-1/VHH-nanobody chimeras triggered constitutive cell  
315 death responses, indicative of autoactivity. Mismatching of the Pik alleles in conjunction with  
316 nanobody integration could allow for a greater number of successful integrations, streamlining this  
317 engineering strategy.

318 Recently, there have been several reports of engineering expanded effector recognition in integrated  
319 HMA domain containing NLRs (Cesari et al., 2022; De la Concepcion et al., 2019; Liu et al., 2021;  
320 Maidment et al., 2022; Zhang et al., 2022). In the RGA5/RGA4 system, recognition of AVR-Pib and  
321 AVR-PikD has been engineered into the RGA5 HMA domain, however this results in compromised  
322 AVR-Pia recognition (Cesari et al., 2022; Liu et al., 2021; Zhang et al., 2022). Furthermore,  
323 implementation of model-driven engineering of RGA5 into crop systems is challenging and has had  
324 variable success, with RGA5 mutants that exhibit expanded recognition in a *N. benthamiana* model  
325 not always translating to disease resistance in transgenic rice lines (Cesari et al., 2022; Zhang et al.,  
326 2022). In parallel, engineering of the Pikp-1 HMA to respond to previously unrecognised AVR-Pik



327 variants has been shown in *N. benthamiana* assays and transgenic rice lines (Maidment et al., 2022).  
328 Interestingly, full replacement of the integrated HMA for the HMA domain of OsHIPP19 caused  
329 autoimmunity, which was removed by mutation of the HMA. However, this is not always possible  
330 as the approach benefitted from knowledge of the NLR-ID/effector complex (Białas et al., 2021; De  
331 la Concepcion et al., 2019; Maidment et al., 2022). Whether engineering facilitated by allelic  
332 mismatching of the Pik pair can provide resistance in transgenic rice lines is yet to be tested and is  
333 an important next step to demonstrate the use of this approach for translating recognition in plant  
334 models to resistance in crops.

### 335 **The Pik system relies on high affinity effector binding to activate defence responses in planta.**

336 We demonstrate the RGA5 HMA domain can be integrated into the Pikm-1 backbone and  
337 engineered to recognise AVR-Pik, including variants not recognised by wildtype Pikm-1. As shown  
338 by our biophysical and structural analysis, the six mutations introduced in the APB mutant of RGA5  
339 HMA domain, based on the host target OsHIPP19, recapitulate a functional AVR-Pik binding  
340 recognition interface. These data highlight the power of host target-guided design of NLR-ID baits  
341 for engineering recognition.

342 While low levels of cell death were observed, neither the Pikm-1<sup>RGA5</sup> nor Pikm-1<sup>APB</sup> responded to  
343 AVR-Pia at a level comparable with RGA5/RGA4. It is possible the AVR-Pia/AVR1-CO39 interface  
344 is occluded in the Pikm-1<sup>RGA5</sup> chimera, and co-IP with the APB mutant did not show association in  
345 planta. However, we speculate the lack of AVR-Pia recognition *N. benthamiana* may more likely be  
346 due to a lower affinity of the effector for the HMA domain, as we were able to observe some weak  
347 cell death when Pikm-1<sup>RGA5</sup> or Pikm-1<sup>APB</sup> co-expressed with Pikp-2 was challenged with AVR-Pia.  
348 Previous studies have benchmarked the affinity of AVR-Pia/AVR1-CO39 for the RGA5 HMA  
349 domain in the micromolar range (Guo et al., 2018; Ortiz et al., 2017), while AVR-Pik effectors bind  
350 their cognate integrated HMA domains with nanomolar affinity (for interactions that result in cell  
351 death responses). It remains unclear why the binding affinities of the Pik HMA and RGA5 HMA  
352 domains for their cognate effectors differ so significantly. However, the RGA5 post-LRR region,

353 which contains the HMA domain, also contains several other small uncharacterised domains (**Figure**  
354 **S11**), which may contribute to effector binding. Indeed, AVR-Pia is known to associate with regions  
355 of the RGA5 receptor outside of the HMA domain (Ortiz et al., 2017). However, RGA5 receptors  
356 where the HMA domain has been deleted are unable to respond to AVR-Pia in cell death assays  
357 (Cesari et al., 2013). Furthermore, a recent studies engineering AVR-Pib and AVR-Pik recognition in  
358 RGA5, respectively, showed mutations outside of the HMA influenced effector recognition in planta  
359 (Liu et al., 2021; Zhang et al., 2022). Collectively, available data suggest that RGA5-mediated effector  
360 recognition requires the HMA domain, but alone it is not sufficient for effector recognition, and  
361 works together with other regions at the RGA5 C-terminus. Inclusion of these additional regions  
362 from RGA5 into the Pik receptor backbone alongside the RGA5 HMA domain could support AVR-  
363 Pia recognition, but equally so, may affect Pik sensor/helper compatibility. Certainly, the additional  
364 complexity of the RGA4/RGA5 system makes engineering this receptor pair more challenging  
365 compared to the Pik NLRs.

366 Modification of plant NLRs has proven challenging due to the lack of understanding of the context  
367 of NLRs as part of complex systems. In this study, we demonstrate a new avenue for NLR-mediated  
368 resistance engineering that exploits the allelic diversity in the Pik NLR pair to allow for generation  
369 of receptors with expanded recognition specificities that would otherwise result in constitutive cell  
370 death. Our structural, biophysical and in planta analyses demonstrate the Pik system requires a high  
371 affinity effector binding interface to allow for binding to translate to defence, and as a single domain,  
372 the RGA5 HMA domain appears to lack the affinity for AVR-Pia to facilitate a robust Pik chassis-  
373 mediated cell death response. However, our engineering of RGA5 HMA to recognise AVR-Pik from  
374 within the Pikm-1 chassis highlights the strengths of this system for engineering; only a single high-  
375 affinity interface needs to be present to mediate effector recognition, making the Pik system a simple  
376 but efficient means for generating bespoke NLR resistance. This work lays the foundation for the  
377 incorporation of new effector recognition motifs into the Pik system and is a key advance towards  
378 the development of designer NLRs that can be tailored to specific secreted pathogen signatures.

379 **Acknowledgements**

380 We thank the Diamond Light Source, UK (beamline i04 under proposal 25108) for access to X-ray  
381 data collection facilities and Dave Lawson from the JIC Protein Crystallography Platform for expert  
382 technical assistance during data collection. We thank Dan McLean for technical advice with the  
383 besthr R package. We further thank all members of the BLASTOFF team at the Sainsbury Laboratory,  
384 John Innes Centre and Iwate Biotechnology Research Center. We especially thank Vincent Were for  
385 providing PWL2 constructs. This work was supported by UKRI Biotechnology and Biological  
386 Sciences Research Council (BBSRC) Norwich Research Park Biosciences Doctoral Training  
387 Partnership, (grant BB/M011216/1); the UKRI BBSRC, UK (grants BB/P012574/1,  
388 BBS/E/J/000PR9797) the European Research Council (ERC proposal 743165), the ERAMUS+  
389 training programme, the John Innes Foundation and the Gatsby Charitable Foundation.

390 **Figures**

**A**

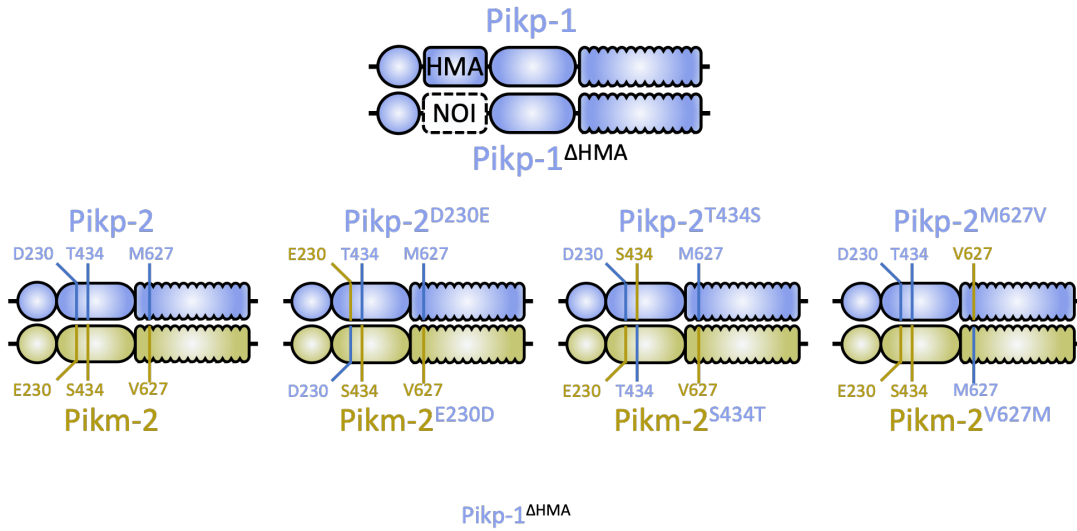

**B**

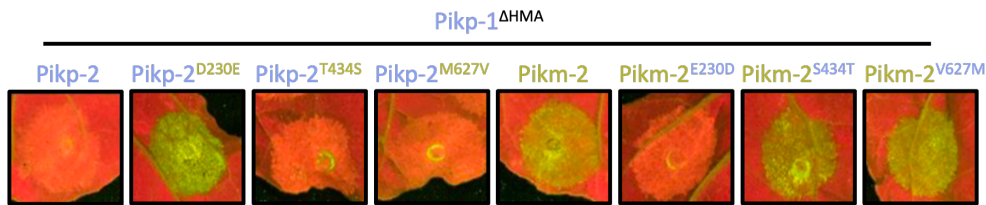

**C**

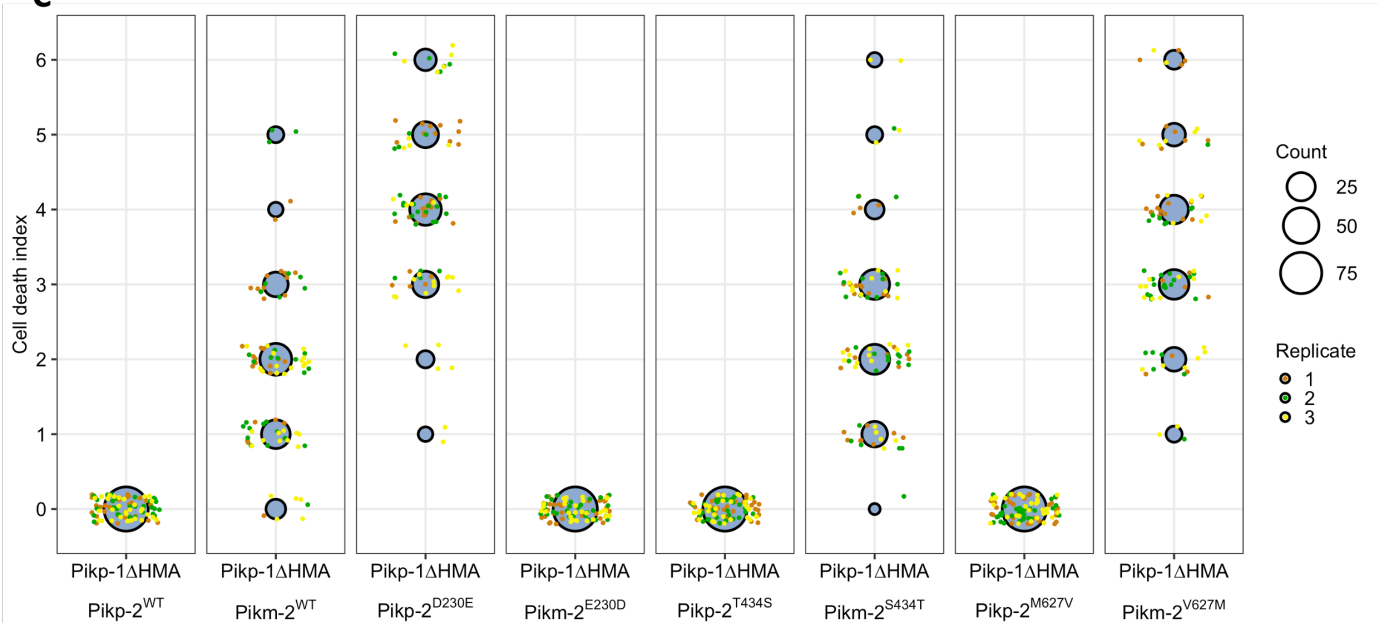

391 **Figure 1. Pik-2 polymorphisms determine Pik-1 HMA domain independent allelic compatibility.**

392 **A)** Schematic diagram highlighting the domain architecture of Pikp-1 and Pikp-1 $\Delta$ HMA sensor NLRs

393 and the polymorphisms between the Pikp-2 and Pikm-2 helper NLRs. **B)** The HMA domain of Pikp-

394 1 is not required for effector-independent cell death in *N. benthamiana*; compatibility remains with

395 Pikp-2 but not Pikm-2. Reciprocal D230E and E230D mutations in Pikp-2 and Pikm-2 flip the

396 compatibility of the helper NLRs for Pikp-1 $\Delta$ HMA. **C)** Cell death scoring for repeats of Pikp-1 $\Delta$ HMA co-

397 expressed with Pikp-2, Pikm-2, and mutants in *N. benthamiana* represented as dot plots. The total  
398 number of repeats was 75 per sample. For each sample, all the data points are represented as dots  
399 with a distinct colour for each of the three biological replicates; these dots are jittered around the cell  
400 death score for visualisation purposes. The size of the central dot at each cell death value is  
401 proportional to the number of replicates of the sample with that score. Quantification and statistical  
402 analysis of these results can be found in **Appendix 1 A**.

403

404

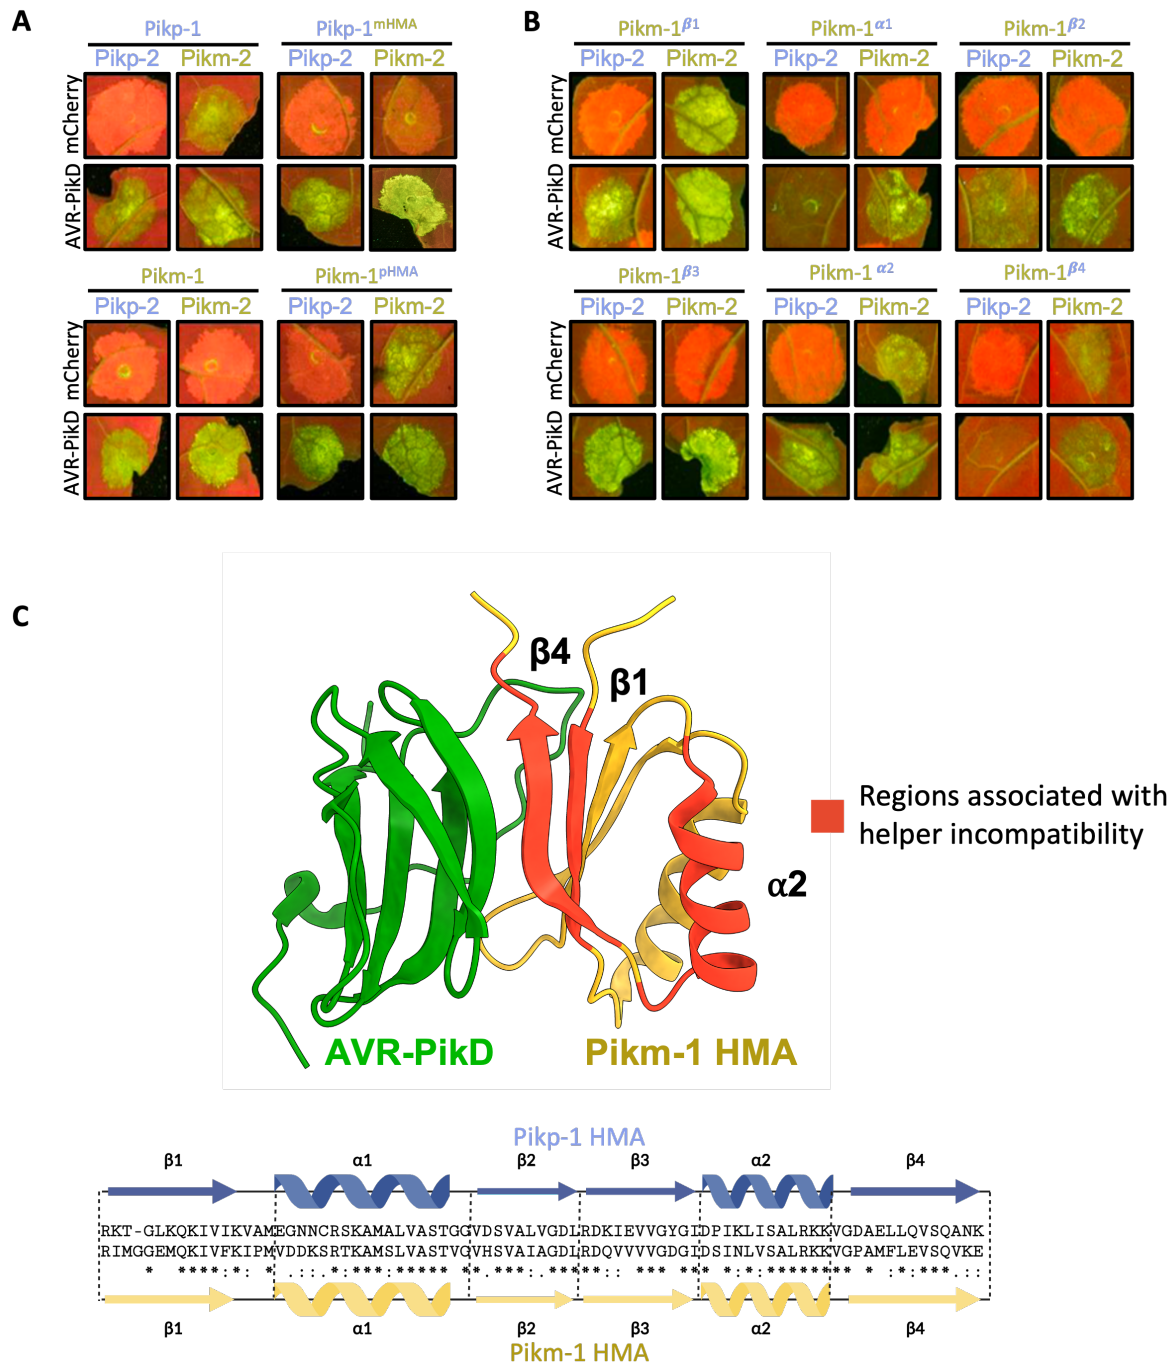

405 **Figure 2. The HMA domain of Pik-1 is important for compatibility with Pik-2 helpers. A)**  
406 **Co-expression of Pikp-1 with Pikm-2 triggers effector-independent cell death in *N. benthamiana*.**  
407 **Integration of the Pikm-1 HMA into Pikp-1 facilitates Pikp-1 compatibility with Pikm-2, whereas**  
408 **incorporation of the Pikp-1 HMA into Pikm-1 abolishes compatibility with Pikm-2. Quantification**  
409 **and statistical analysis of these results are shown in Figure S1 A, Appendix 1 B. B)** Incompatibility  
410 **of the Pikp-1 with Pikm-2 in *N. benthamiana* is linked to the  $\alpha 2$  helix,  $\beta 1$ , and  $\beta 4$  strands of the HMA**

411 domain, with Pikm-1 HMA chimeras carrying the Pikp-1 secondary structure elements resulting in  
412 effector-independent cell death when co-expressed with Pikm-2. Quantification and statistical  
413 analysis of these results can be found in **Figure S1 B, Appendix 1 C.** C) Some regions of the HMA  
414 domain that are involved in sensor/helper incompatibility (red) are shared with the AVR-Pik  
415 binding interface (PDB ID: 6FU9).

416

417

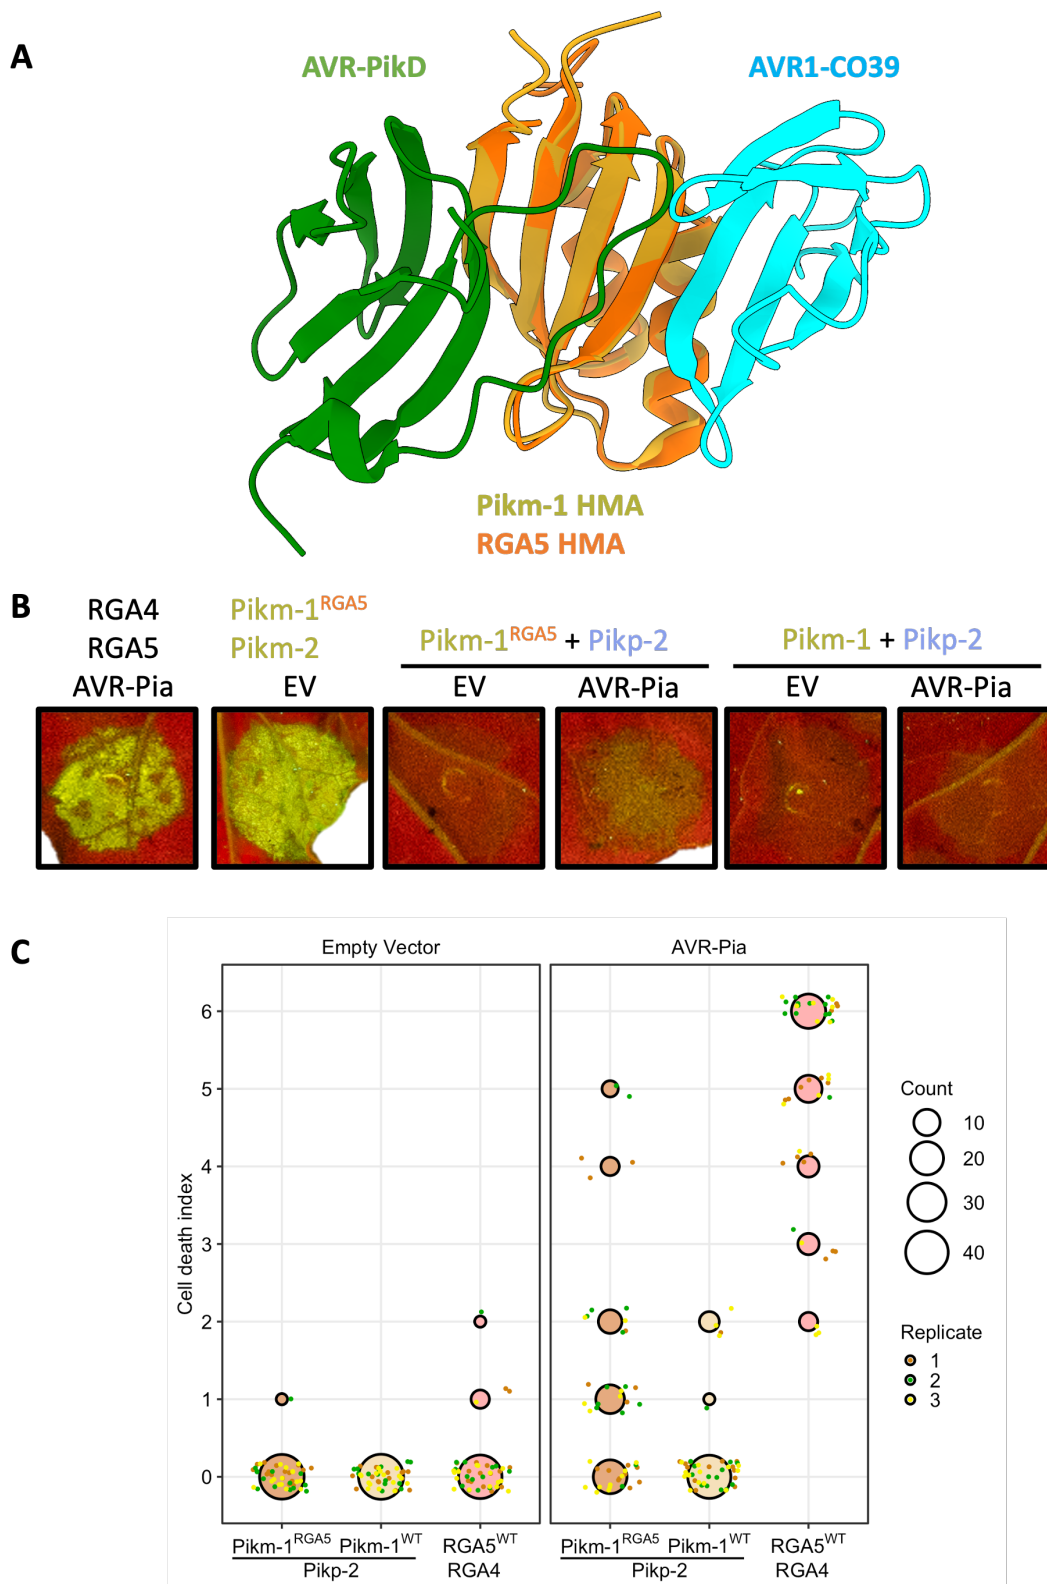



418 **Figure 3. Autoactivity following integration of the RGA5 HMA domain into Pikm-1 is relieved**  
419 **by allelic mismatch with Pikp-2, but only weakly responds to AVR-Pia.** A) Schematic structural  
420 alignment of the RGA5 HMA domain (orange; PDB ID: 5ZNG) with the Pikm-1 HMA domain (gold;  
421 PDB ID: 6FU9) showing the different binding interfaces of these HMAs for the AVR-Pik (green) and  
422 AVR1-CO39 (cyan)/AVR-Pia (not shown) effectors. B) Co-expression of Pikm-1<sup>RGA5</sup> with Pikp-2  
423 suppresses effector independent cell death and responds weakly to AVR-Pia. C) Cell death scoring of  
424 wildtype Pikm-1 and Pikm-1<sup>RGA5</sup> co-expressed with Pikp-2 in *N. benthamiana* represented as dot  
425 plots. The total number of repeats was 45 per sample. For each sample, all the data points are  
426 represented as dots with a distinct colour for each of the three biological replicates; these dots are  
427 jittered around the cell death score for visualisation purposes. The size of the central dot at each cell  
428 death value is proportional to the number of replicates of the sample with that score. Statistical  
429 analyses of these results are shown in **Appendix 1 G**.

430

431

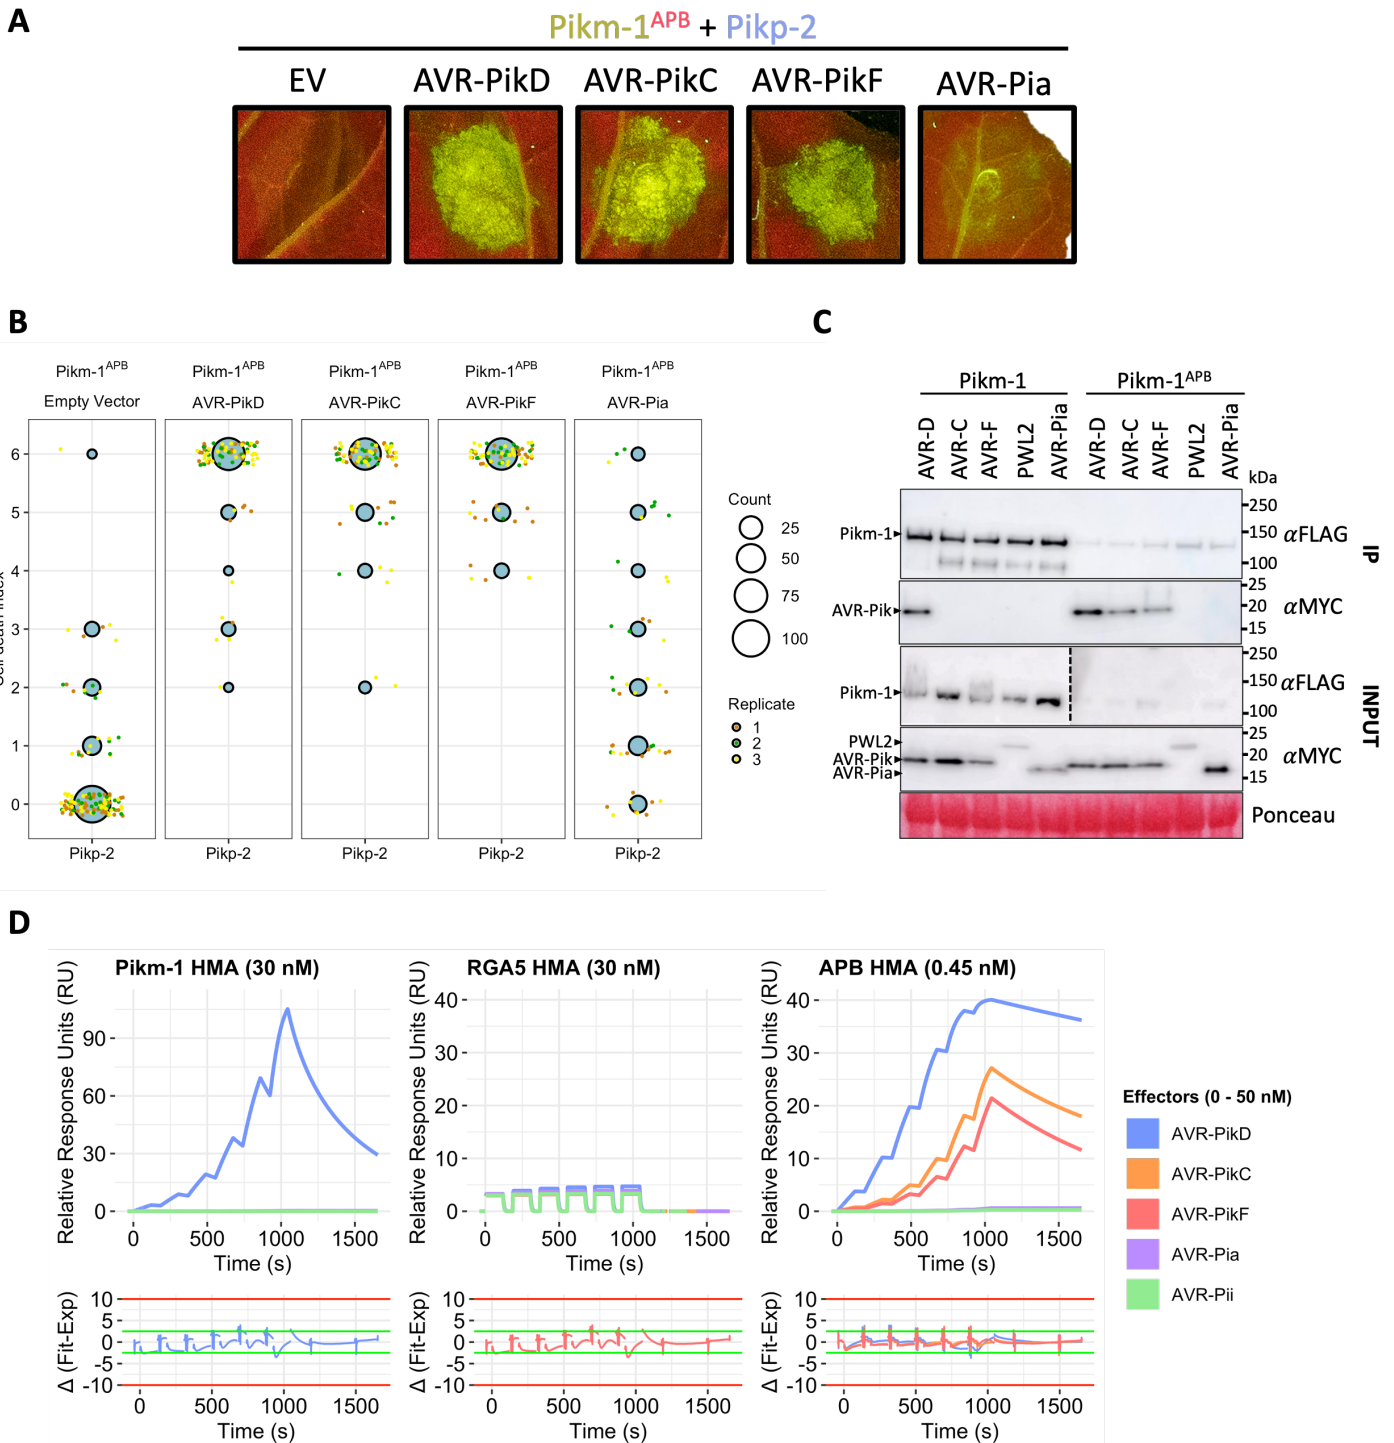

432 **Figure 4. The RGA5 APB mutant binds and recognises AVR-Pik when integrated into Pikm-1. A)**

433 Pikm-1<sup>APB</sup> chimera responds to all variants of AVR-Pik tested and activates cell death when co-

434 expressed with Pikp-2 in *N. benthamiana*, but like Pikm-1<sup>RGA5</sup>, it only weakly responds to AVR-Pia.

435 **B)** Cell death scoring of Pikm-1<sup>APB</sup> co-expressed with AVR-Pik variants D, C and F in *N. benthamiana*

436 represented as dot plots. The total number of repeats was 80 per sample. For each sample, all the

437 data points are represented as dots with a distinct colour for each of the three biological replicates;

438 these dots are jittered around the cell death score for visualisation purposes. The size of the central  
439 dot at each cell death value is proportional to the number of replicates of the sample with that score.  
440 Statistical analyses of these results are shown in **Appendix 1 I C)** Co-immunoprecipitation of Pikm-  
441 1<sup>APB</sup> with different MAX effectors shows association with AVR-Pik variants, but not AVR-Pia, in  
442 planta. Dotted line denotes separate membrane exposures of the same membrane. **D)** Surface  
443 plasmon resonance sensograms for the interaction of HMA domains of Pikm-1, RGA5 and RGA5  
444 APB mutant with effectors AVR-PikD, AVR-PikC, AVR-PikF and AVR-Pia. Non-MAX effector  
445 AVR-Pii was added as a negative control. Response units for each labelled protein concentration are  
446 shown with the residuals plot beneath (SPR acceptance guides as determined by Biacore software  
447 are shown as green and red lines in the residuals plots). Concentration of each protein in the assay  
448 is indicated next to their corresponding name. Each experiment was repeated a minimum of 3 times,  
449 with similar results.

450

451

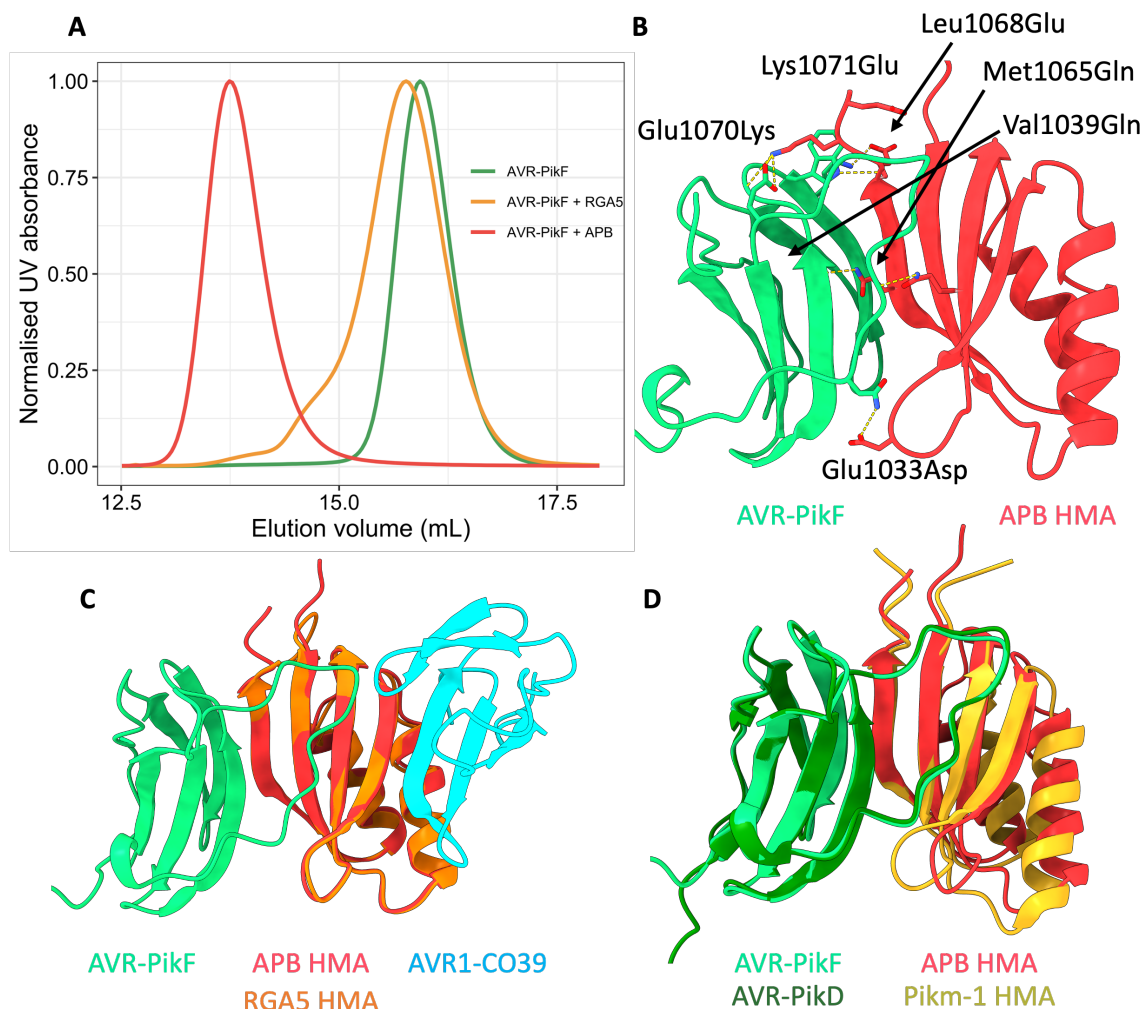

452 **Figure 5. Six mutations in the RGA5 HMA reconstitutes a high affinity AVR-Pik binding**  
453 **interface akin to that of the Pik-1 HMA. A)** Analytical size-exclusion chromatography of AVR-PikF  
454 with the RGA5 and APB HMA proteins. A mixture of AVR-PikF and APB HMA (red) elutes earlier  
455 than a mixture of RGA5 and AVR-PikF (orange) or AVR-PikF alone (green), indicative of complex  
456 formation between AVR-PikF and the APB HMA. **B)** The crystal structure of AVR-PikF in complex  
457 with the RGA5 APB HMA mutant (PDB: 8B2R). Mutations in RGA5, guided by the structure of the  
458 OsHIPP19/AVR-PikF complex, are shown forming contacts with AVR-PikF and are labelled. **C)**  
459 Superimposition of the crystal structures of the APB/AVR-PikF complex with the RGA5/AVR1-  
460 CO39 complex (PDB ID: 5ZNG) showing the swapped effector-binding interface of the APB HMA  
461 compared to the RGA5 HMA. **D)** Superimposition of the APB/AVR-PikF complex with the crystal  
462 structure of AVR-PikD bound to the Pikm-1 HMA domain (PDB ID: 6G10), showing the shared  
463 effector binding interface in these complexes.

28



465

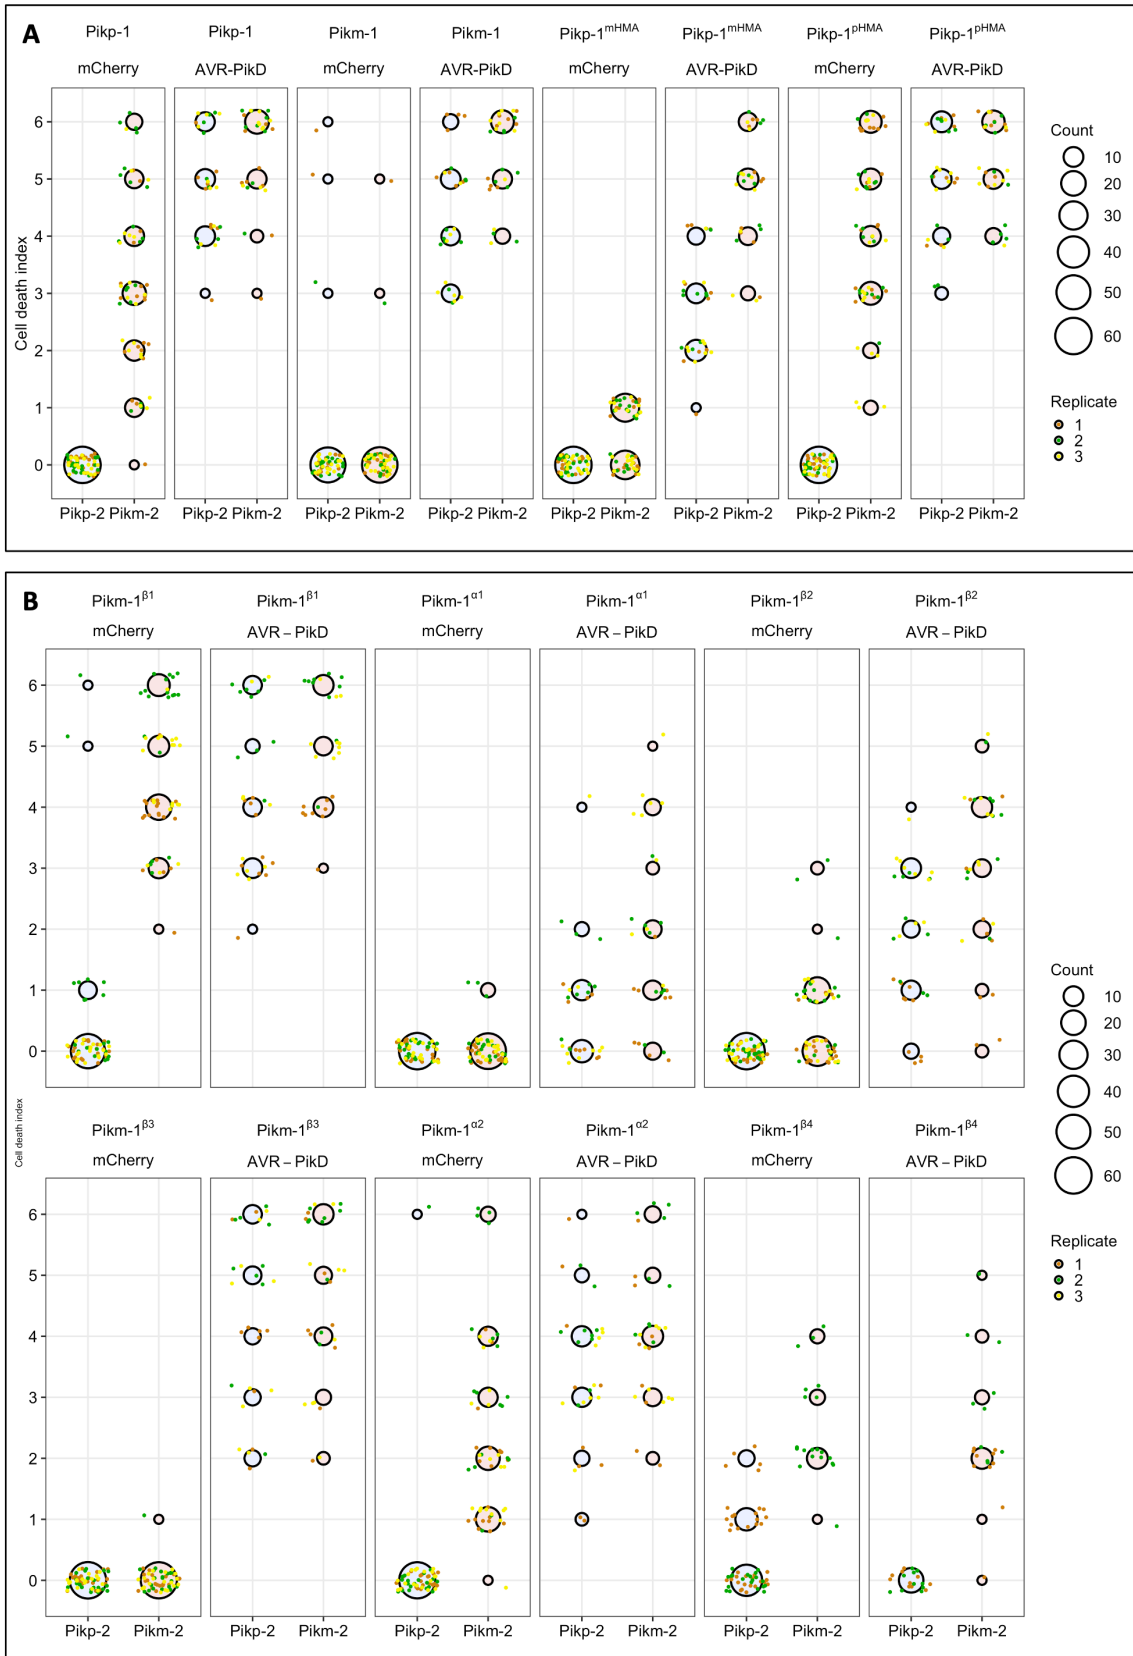

466 **Supplementary figure 1. Cell death scoring of Pik-1 chimeras co-expressed with Pikp-2 and Pikm-**  
 467 **2 in *N. benthamiana*. A) Scoring of Pikp-1<sup>mHMA</sup> and Pikm-1<sup>PHMA</sup> chimeras when co-expressed with**  
 468 **Pikp-2 or Pikm-2 and either AVR-PikD or mCherry. B) Scoring of Pikm-1 chimeras carrying different**

469 secondary structures from the P<sub>ikp</sub>-1 HMA when co-expressed with P<sub>ikp</sub>-2 or P<sub>ikm</sub>-2 and either  
470 AVR-P<sub>ikD</sub> or mCherry. Scoring is represented as dot plots. The total number of repeats was 60 per  
471 sample for both **A** and **B**. For each sample, all the data points are represented as dots with a distinct  
472 colour for each of the three biological replicates; these dots are jittered around the cell death score  
473 for visualisation purposes. The size of the central dot at each cell death value is proportional to the  
474 number of replicates of the sample with that score. Statistical analysis of these results is shown in  
475 **Appendix 1 B**.

476

477

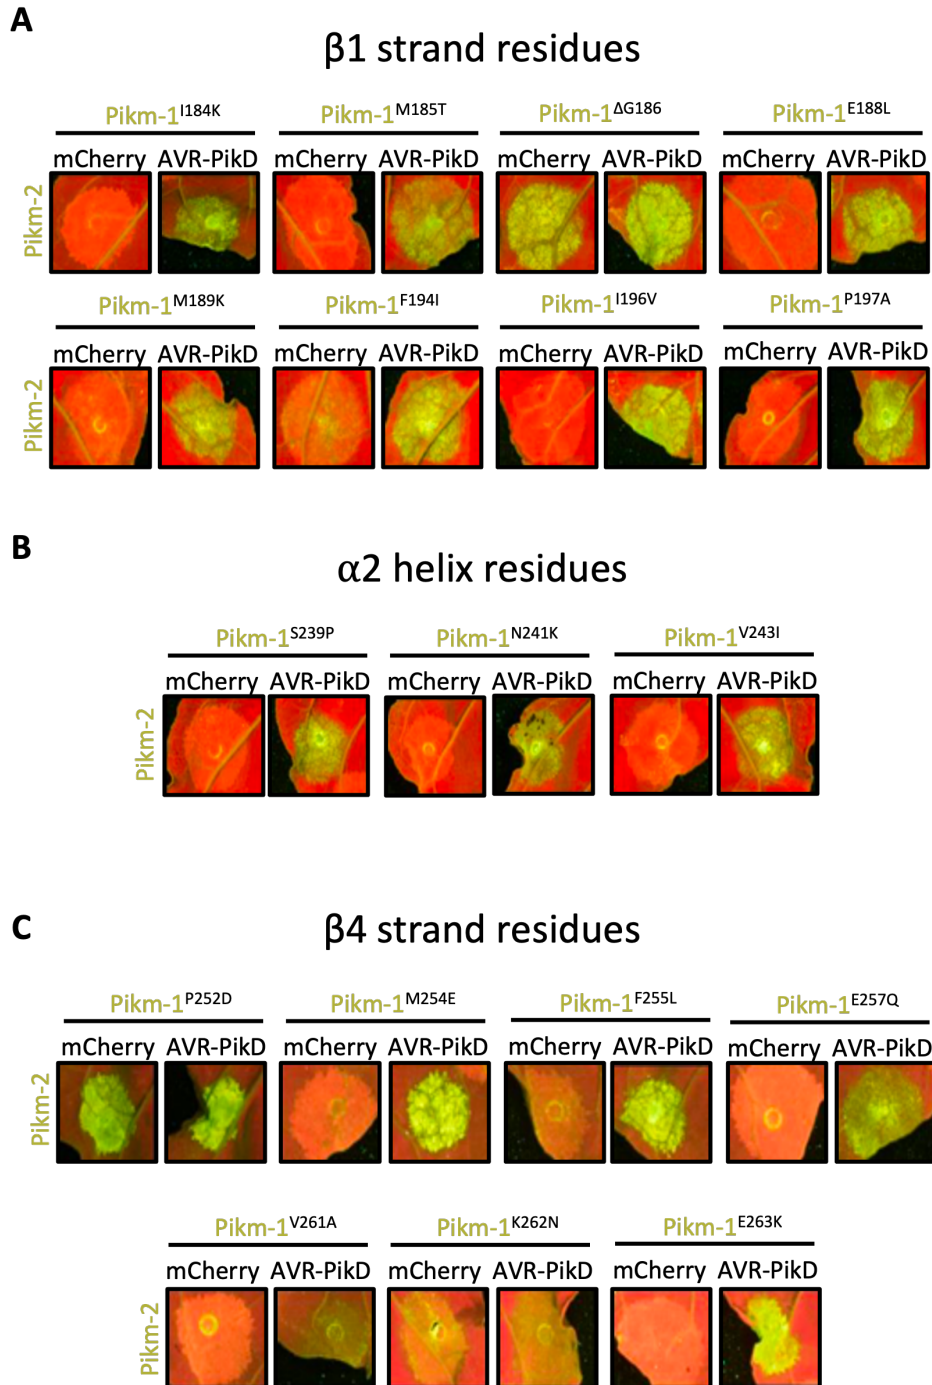

478 **Supplementary figure 2. The effect of point mutations in the  $\beta$ 1 strand,  $\alpha$ 2 helix, and  $\beta$ 4 strand**  
479 **secondary structures of the Pikm-1 HMA domain, and their effect on compatibility with the**  
480 **Pikm-2 helper in *N. benthamiana*. Point mutations are substituted with the corresponding residue**  
481 **in the Pikp HMA. A) Individual point mutations of the residues in the  $\beta$ 1 strand. B) Individual point**  
482 **mutations of the residues in the  $\alpha$ 2 helix. C) Individual point mutations of the residues in the  $\beta$ 4**



483 strand. Quantification and statistical analysis of these results are shown in **Figure S3, Appendices 1**  
484 **D, E, F.**

485

486

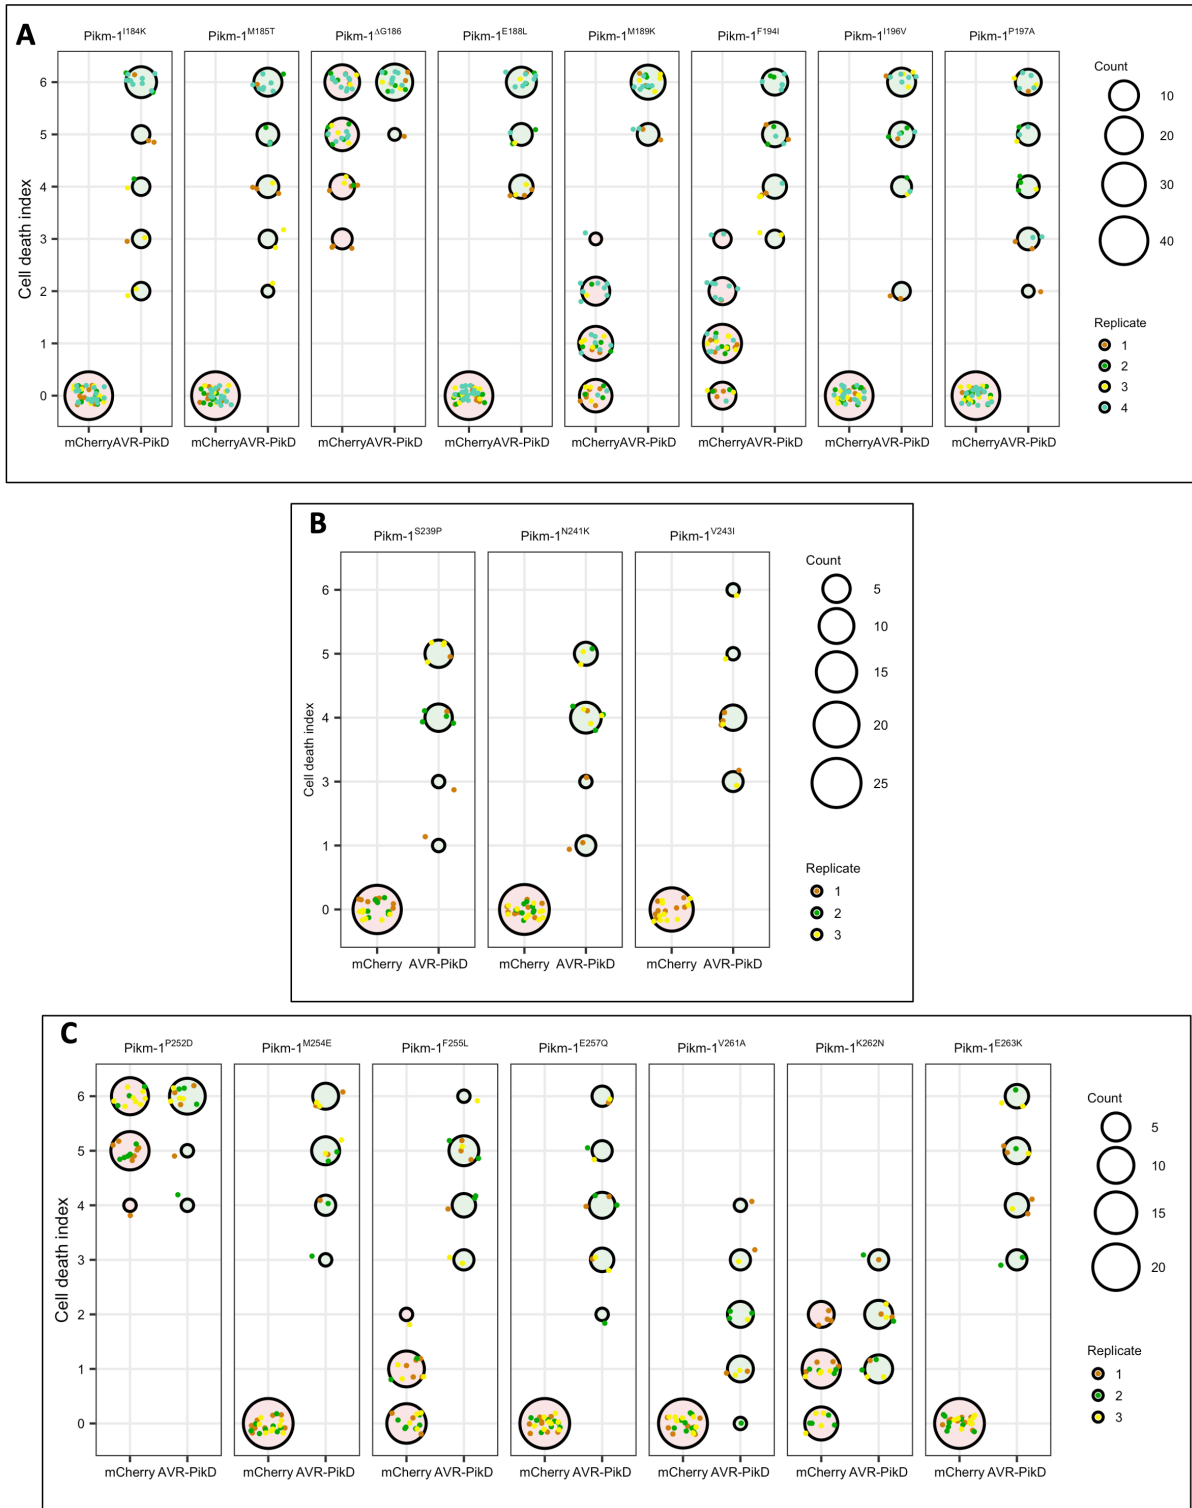

487 **Supplementary figure 3. Cell death scoring of point mutations in the  $\alpha 2$  helix,  $\beta 1$ , and  $\beta 4$  strands**  
488 **of the Pikm-1 HMA domain when expressed with the Pikm-2 helper in *N. benthamiana* A)**  
489 **Residues belonging to the  $\beta 1$  strand. B) Residues belonging to the  $\alpha 2$  helix. C) Residues belonging**  
490 **to the  $\beta 4$  strand. Scoring is represented as dot plots. The total number of repeats was 40 per sample.**  
491 **For each sample, all the data points are represented as dots with a distinct colour for each of the**

492 three biological replicates; these dots are jittered around the cell death score for visualisation  
493 purposes. The size of the central dot at each cell death value is proportional to the number of  
494 replicates of the sample with that score. Quantification and statistical analysis of these results are  
495 shown in **Appendices 1 D, E, F**.

496

497

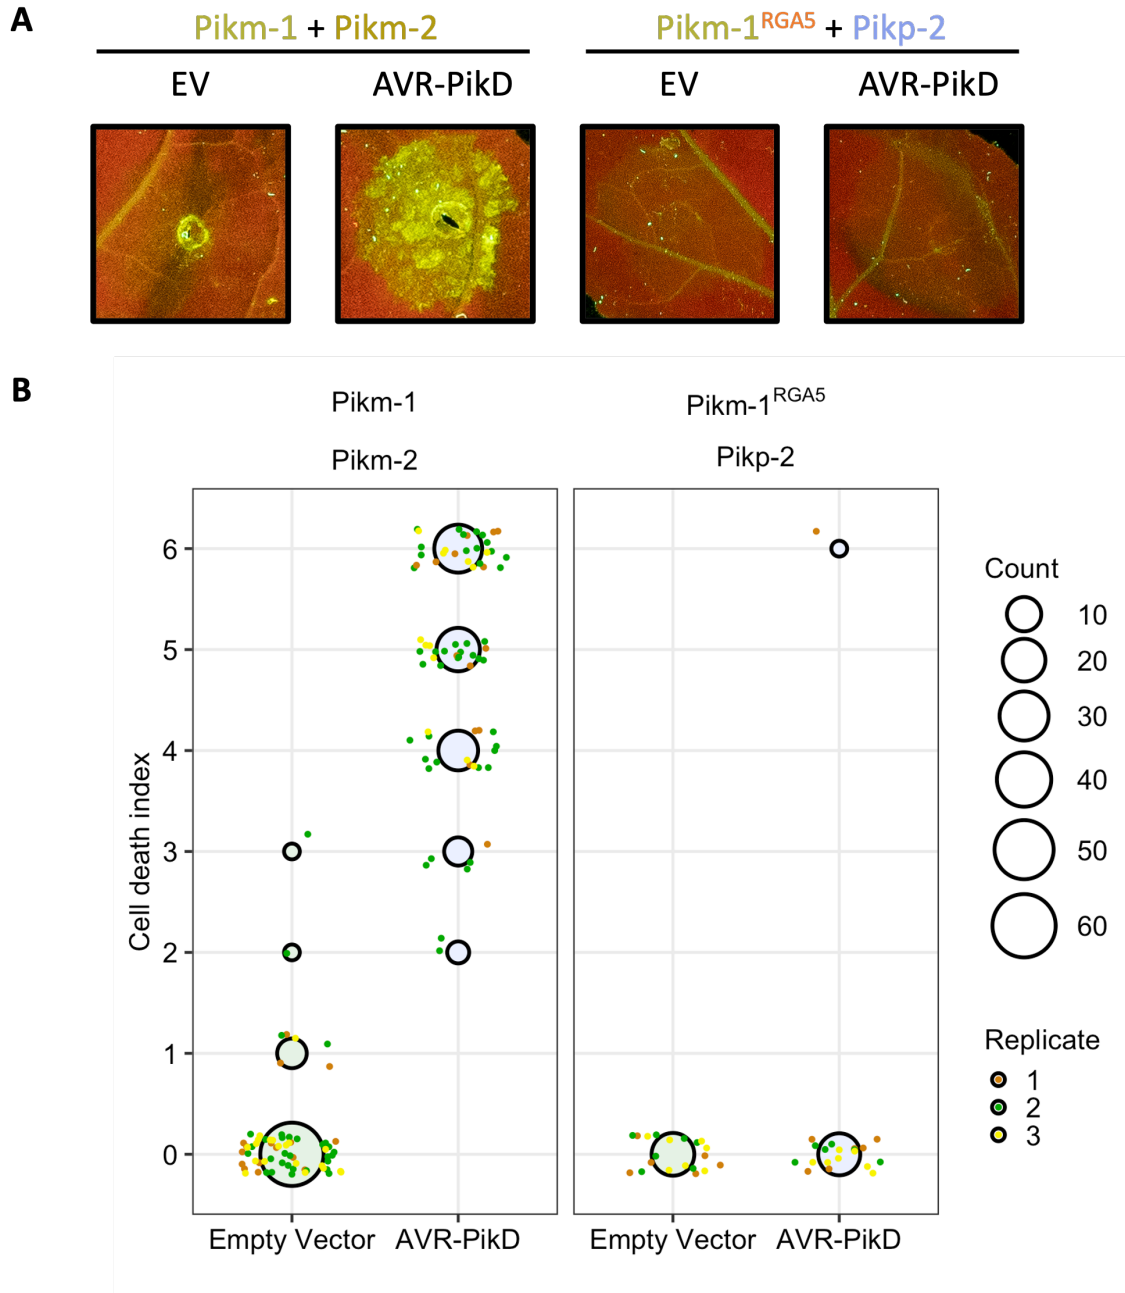

498 **Supplementary figure 4. The Pikm-1<sup>RGAS</sup> chimera does not respond to AVR-PikD in *N.***  
499 ***benthamiana*.** A) Co-expression of the Pikm-1<sup>RGAS</sup> chimera with Pikp-2 and AVR-PikD in *N.*  
500 *benthamiana* leaves does not result in cell death. Wild-type Pikm-1 and Pikm-2 co-expressed with  
501 AVR-PikD shown as positive control B) Cell death scoring of A) represented as dot plots. For each  
502 sample, all the data points are represented as dots with a distinct colour for each of the three  
503 biological replicates; these dots are jittered around the cell death score for visualisation purposes.  
504 The size of the central dot at each cell death value is proportional to the number of replicates of the  
505 sample with that score. Statistical analyses of these results are shown in **Appendix 1 H**.

506

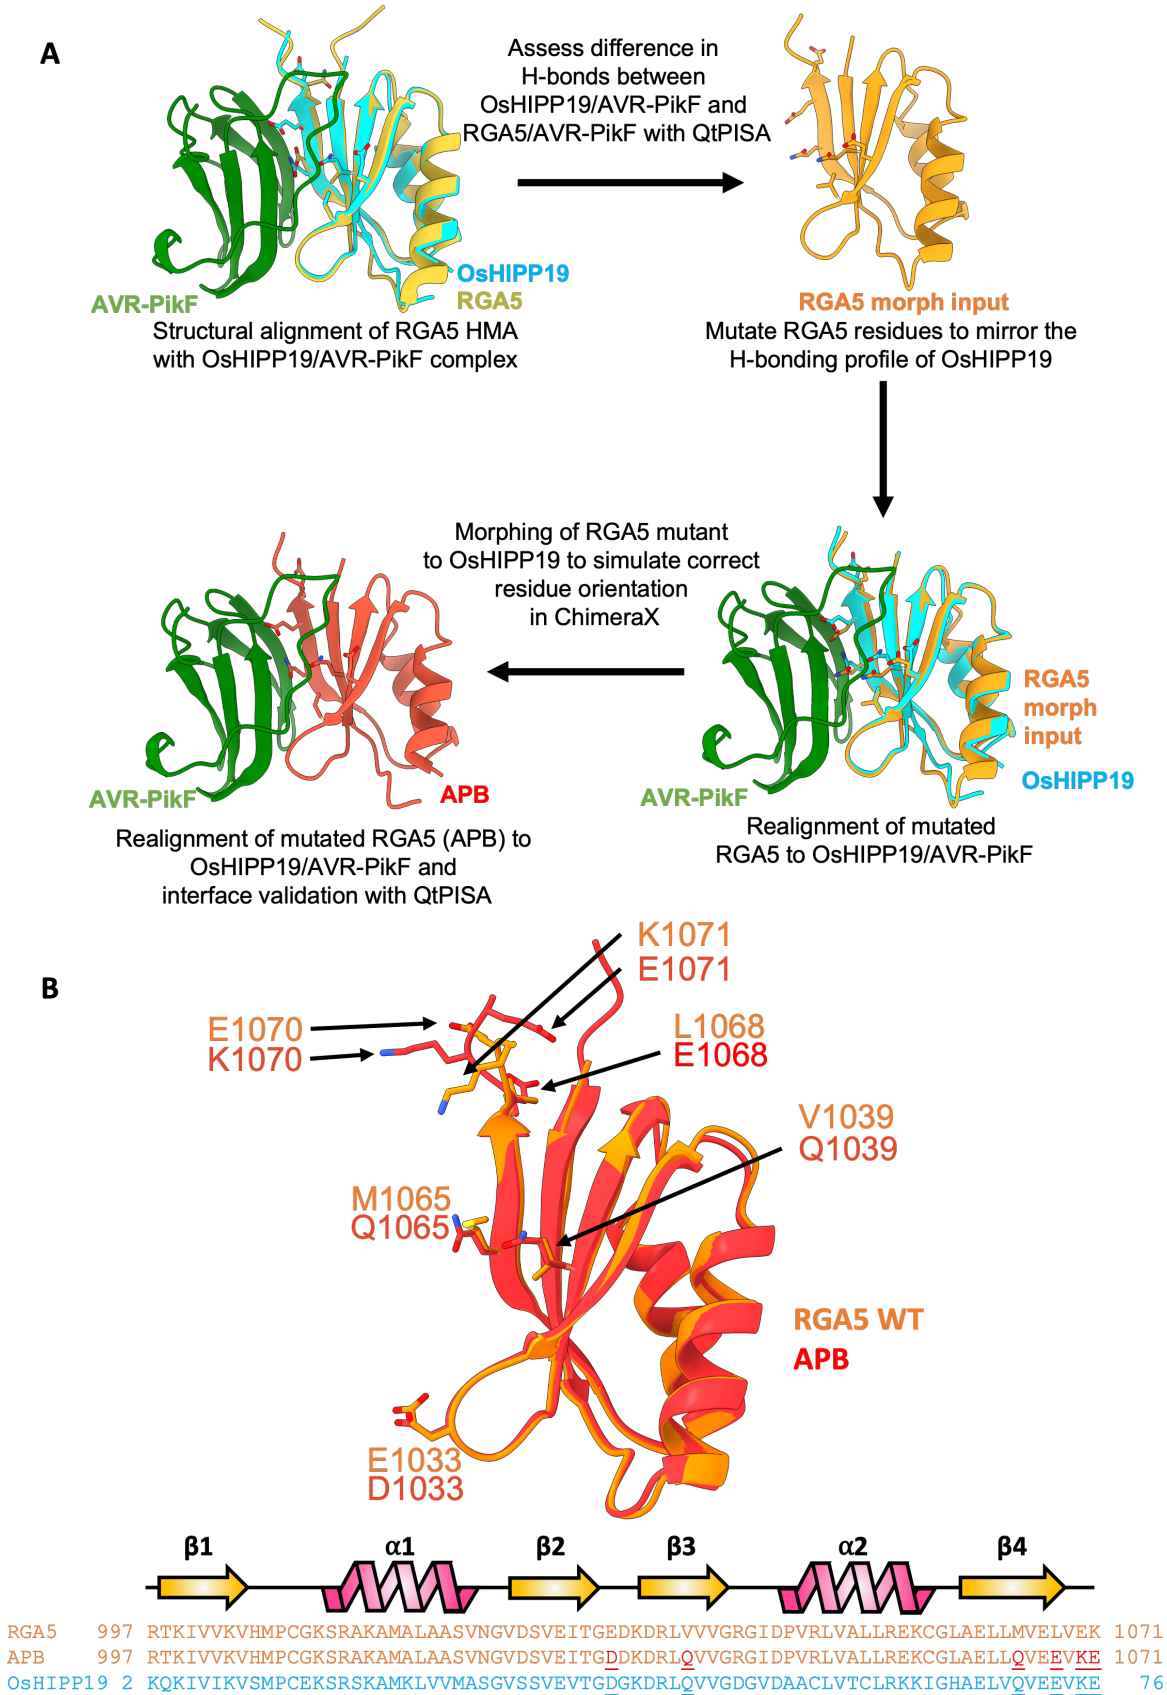

507 **Supplementary figure 5. Structure-guided engineering of RGA5 using OsHIPP19 as a template**  
508 **to generate the APB mutant. A)** Modelling pipeline using QtPISA and ChimeraX to make the RGA5  
509 APB mutant using OsHIPP19 as a template. **B)** Structural alignment of the RGA5 HMA (PDB: 5ZNG)  
510 with the APB mutant with a sequence alignment highlighting the changes informed by OsHIPP19.

511

512

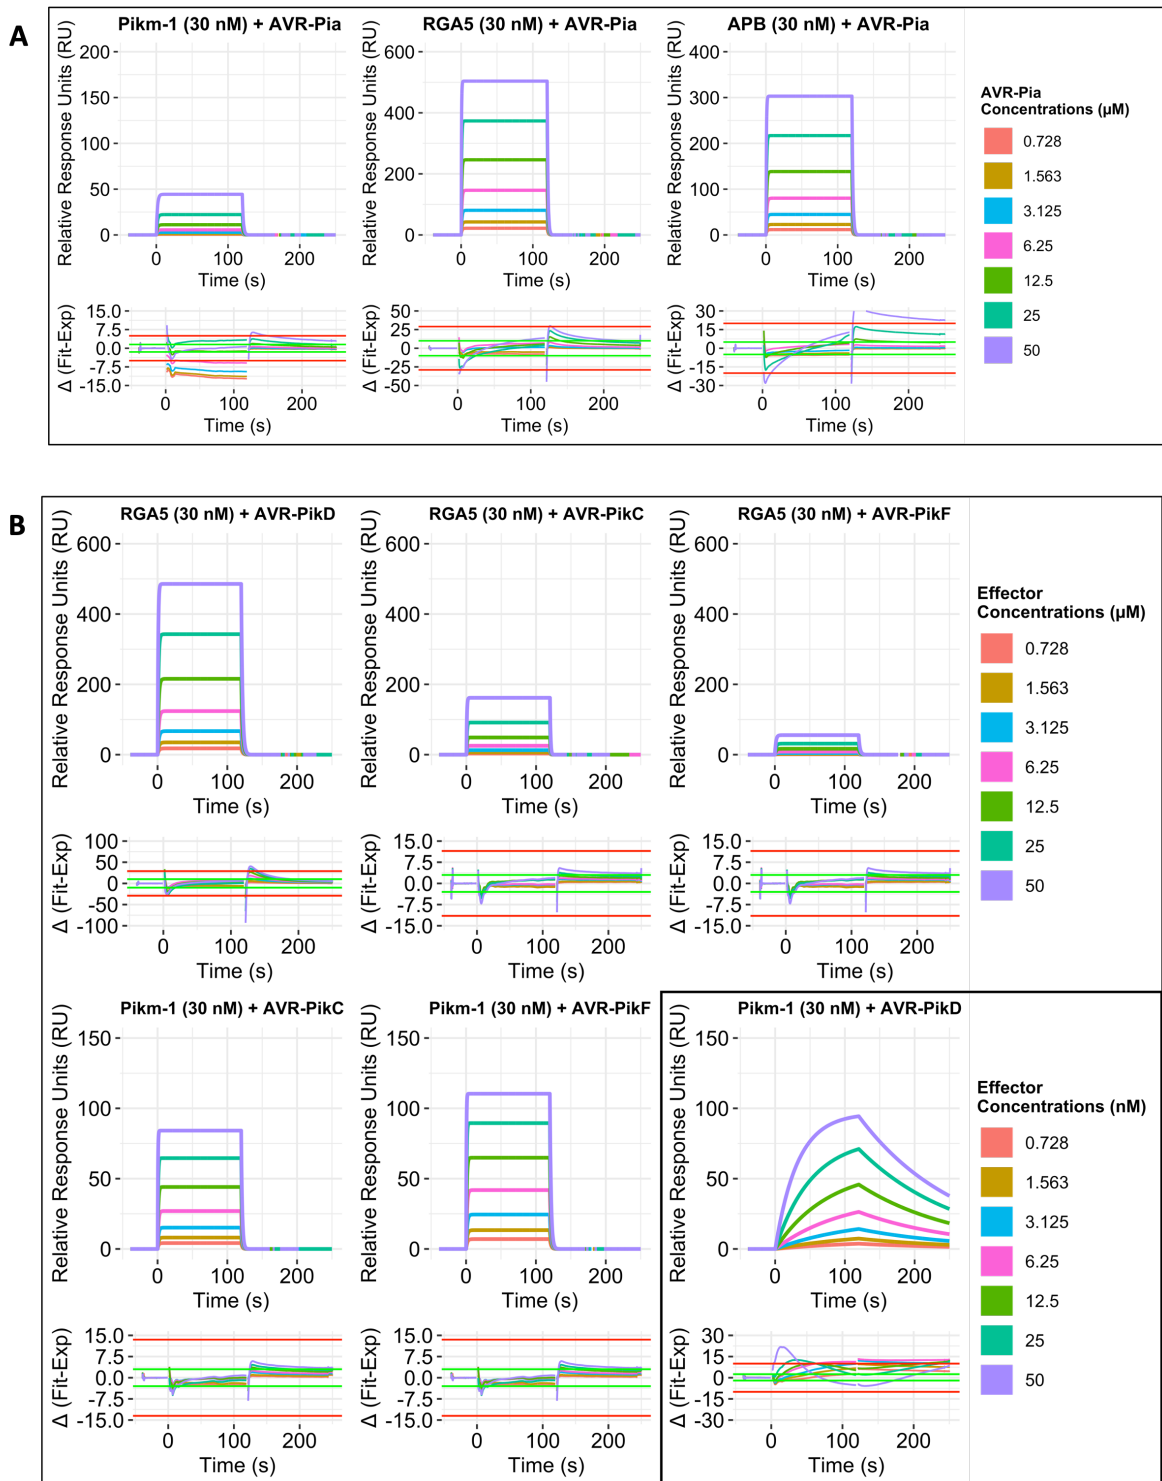

513 **Supplementary figure 6. Multicycle kinetics SPR sensograms capturing effector/HMA**  
 514 **interactions.** Effectors were flowed over the HMA-bound CM5 chip at 8 concentrations (0 - 50  $\mu$ M),  
 515 with the exception of the strong Pikm-1 / AVR-PikD interaction where 0 - 50 nM of AVR-PikD was  
 516 used. Kinetic and binding parameters were calculated using a 1:1 binding model. Residual graphs  
 517 are shown under the sensograms, with data between the red lines being deemed reliable. **A)**

518 Sensograms of the Pikm-1, RGA5 and APB HMA domains with AVR-Pia. **B)** Sensograms of RGA5  
519 and Pikm-1 HMA domains with AVR-Pik effectors.

520



521

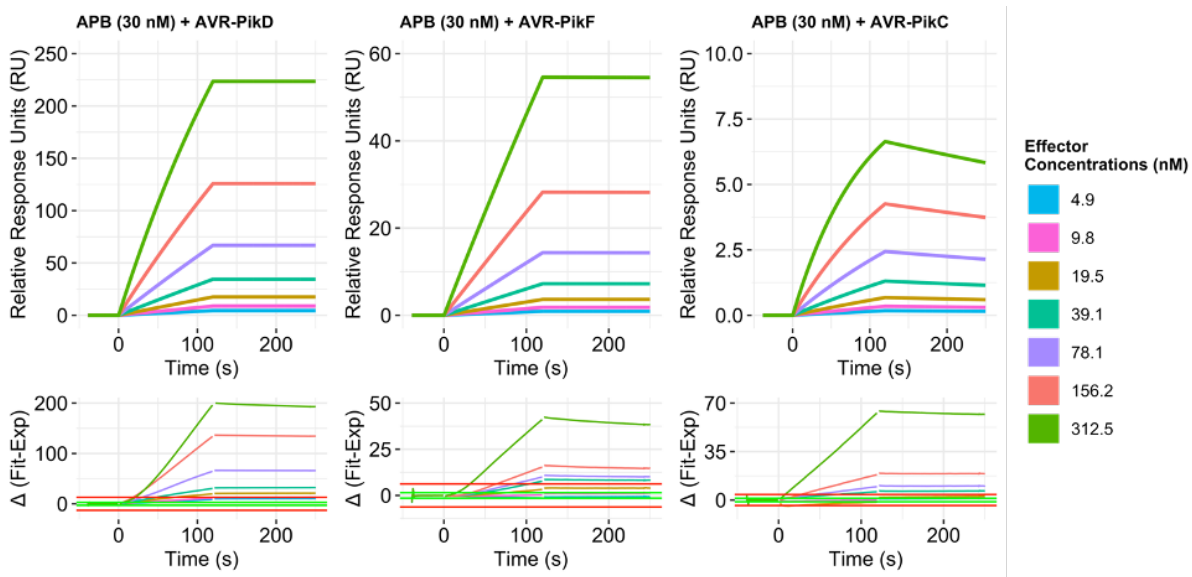

522 **Supplementary figure 7. Multicycle kinetics SPR sensograms of the APB mutant with AVR-Pik**  
523 **variants.** Effectors were flowed over the HMA-bound CM5 chip at 7 concentrations (4.9 – 312.5 nM).  
524 Kinetic and binding parameters were calculated using a 1:1 binding model. Residual graphs are  
525 shown under the sensograms, with data between the red lines being deemed reliable. Due to the  
526 high affinity of the effectors for the HMA, the effectors failed to dissociate from the APB chip  
527 between runs. This is reflected in the poor fit as described by the residuals, and the decreasing  
528 relative response as seen between the samples.

529

530

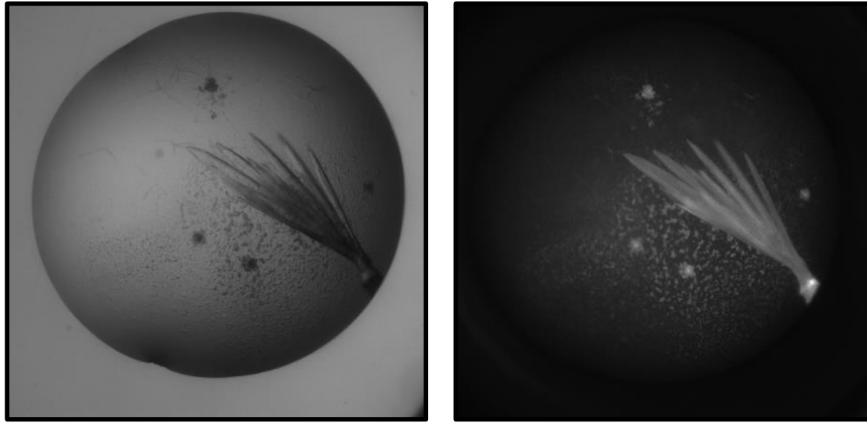

White Light

UV

0.1 M BIS-TRIS pH 5.5 25% PEG3350

531 **Supplementary figure 8. Crystallisation of the APB/AVR-PikF HMA complex.** APB/AVR-PikF  
532 HMA complex crystals formed in Shotgun 1 sparse matrix screen (Molecular Dimensions) well B1  
533 (0.1 M BIS-TRIS pH 5.5, 25% PEG3350) after 10 days.

534

535

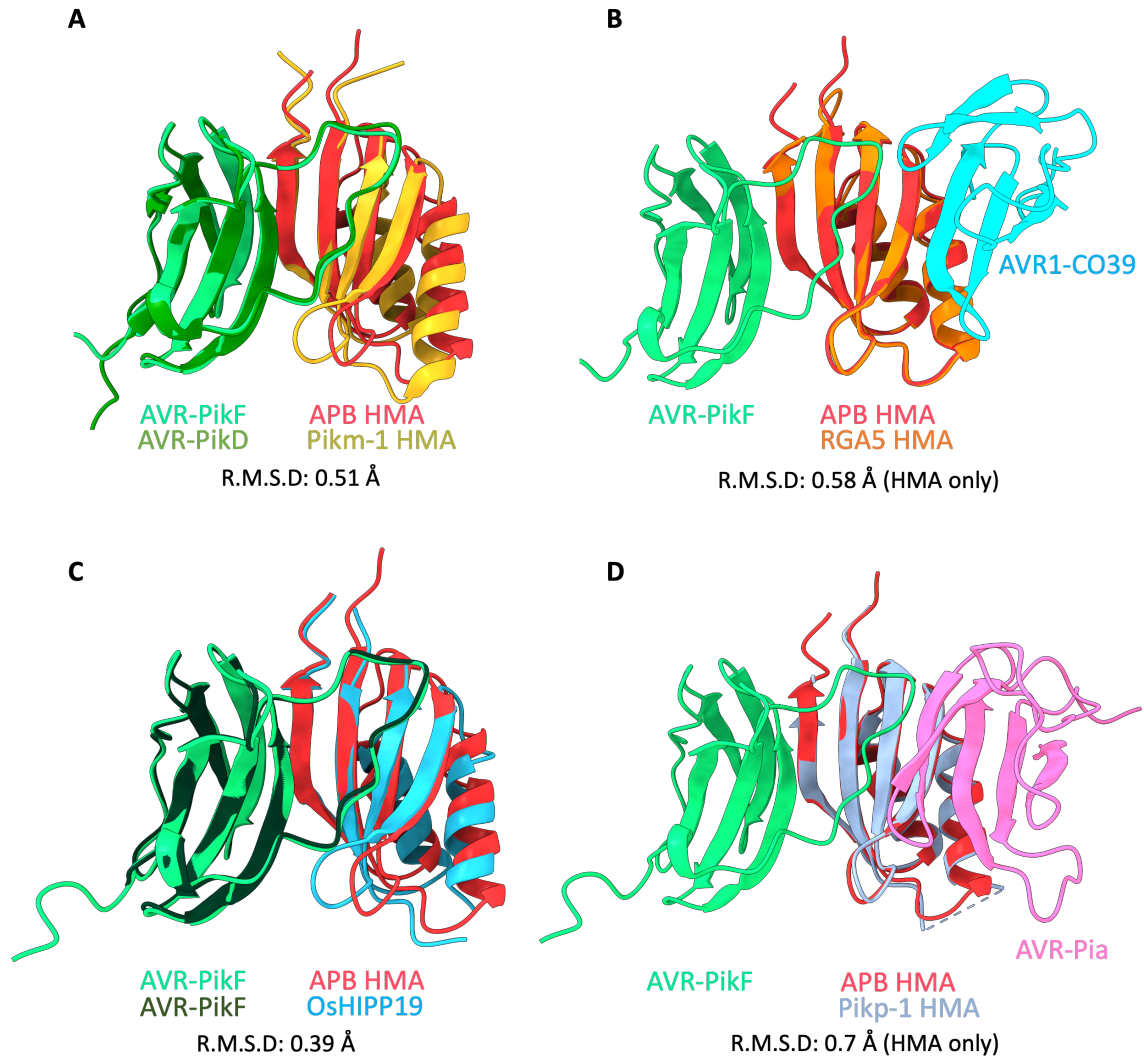

536 **Supplementary figure 9. Superimposition of the crystal structure of APB HMA/AVR-PikF**  
537 **complex with other MAX effector/HMA complexes. A) Superimposition with Pikm-1 HMA/AVR-**  
538 **PikD (PDB ID: 6G10). B) Superimposition with RGA5 HMA/AVR1-CO39 (PDB ID: 5ZNG). C)**  
539 **Superimposition with OsHIPP19/AVR-PikF (PDB ID: 7B1I). D) Superimposition with Pikp-1**  
540 **HMA/AVR-Pia (PDB ID: 6Q76).**

541

542

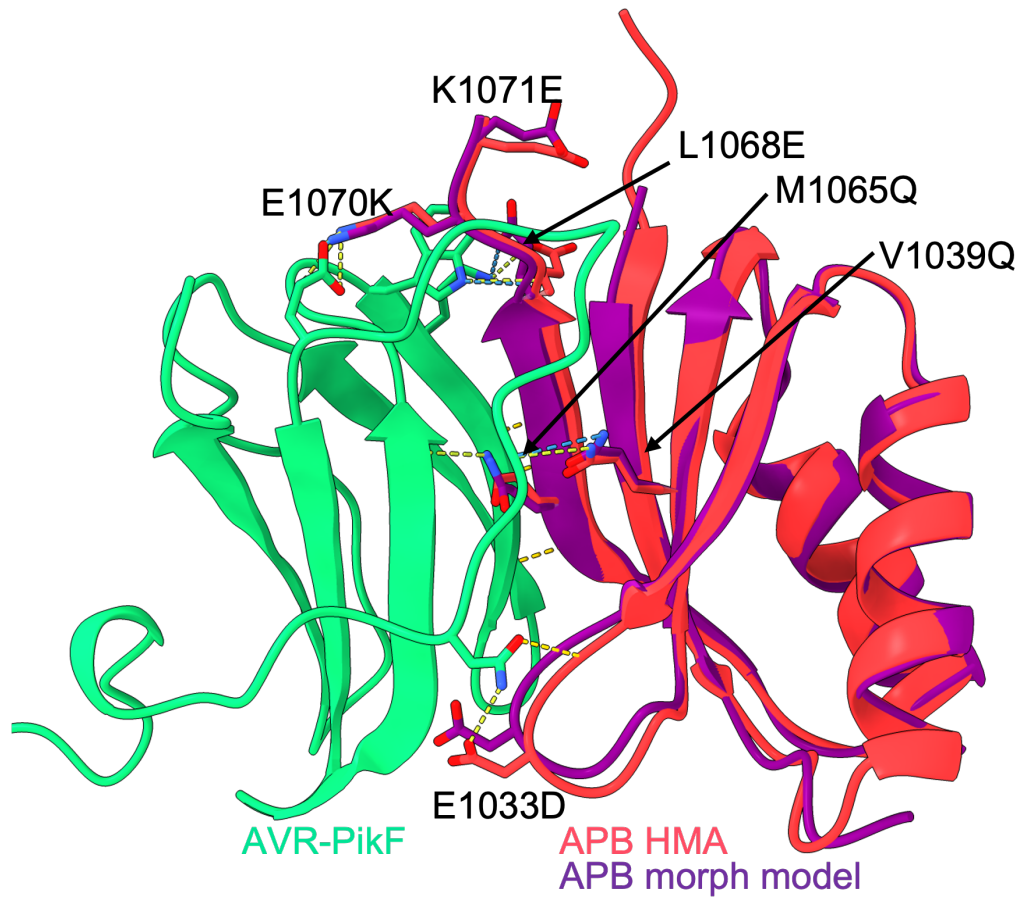

543 **Supplementary figure 10. Superimposition of the crystal structure of APB HMA/AVR-PikF**  
544 **complex with the morph model generated from an OsHIPP19 template. Residues of RGA5 that**  
545 **were mutated based on OsHIPP19 to create the APB mutant are shown.**

546

547

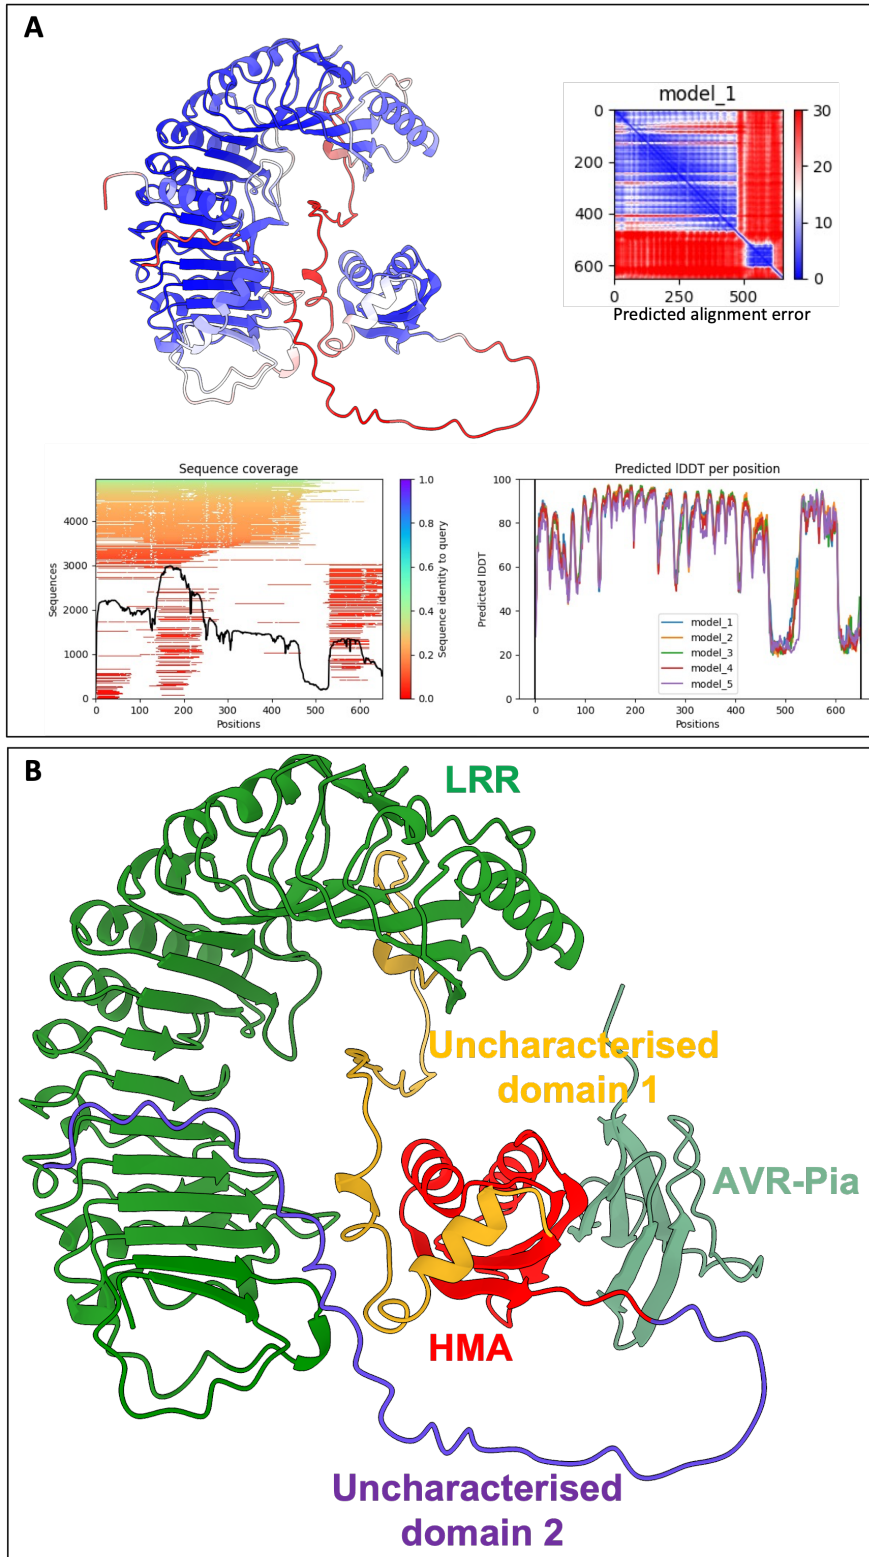

548 **Supplementary figure S11. AlphaFold2 prediction of the C-terminal domains of RGA5 describes**  
549 **previously uncharacterised domains.** A) AlphaFold2 v2.1 (Jumper et al., 2021) (as implemented in  
550 the AlphaFold ColabFold (Mirdita et al., 2022)) prediction of the RGA5 C-terminus. The RGA5  
551 model is coloured by residue position confidences, with blue indicating high confidence and red

552 low confidence. The LRR and HMA domains appear well predicted, however additional regions at  
553 the C-terminus lack confidence. **B)** Colouring of the RGA5 AlphaFold2 model to highlight the  
554 different domains present, with AVR-Pia (olive green) superimposed at the predicted HMA  
555 interface (from PDB ID: 6Q76).

556

557 **Supplementary table 1. Full kinetic parameters for HMA-effector interactions as measured by**  
 558 **SPR.**

| <b>Pikm-1</b> |                           |                    |           |         |         |          |
|---------------|---------------------------|--------------------|-----------|---------|---------|----------|
| Effector      | $k_a$ ( $M^{-1} s^{-1}$ ) | $k_d$ ( $s^{-1}$ ) | $K_D$ (M) | R-max   | U-value | $\chi^2$ |
| AVR-PikD      | 5.77E+05                  | 5.74E-03           | 9.96E-09  | 134.3   | 2       | 1.86E+00 |
| AVR-PikC      | 8.03E+04                  | 6.99E-01           | 8.70E-06  | 120.8   | 20      | 3.21E+00 |
| AVR-PikF      | 9.65E+04                  | 5.89E-01           | 6.10E-06  | 144.1   | 15      | 6.72E+00 |
| AVR-Pia       | 3.72E+01                  | 6.95E-01           | 1.87E-02  | 16647.9 | 95      | 1.90E+01 |
| AVR-Pii       | N.B.                      | N.B.               | N.B.      | N.B.    | N.B.    | N.B.     |
| <b>RGA5</b>   |                           |                    |           |         |         |          |
| AVR-PikD      | 3.79E+04                  | 5.42E-01           | 1.43E-05  | 833.3   | 15      | 7.07E+01 |
| AVR-PikC      | 1.81E+04                  | 1.22E+00           | 6.73E-05  | 706.6   | 20      | 2.51E+00 |
| AVR-PikF      | 8.13E+03                  | 5.40E-01           | 6.64E-05  | 240.3   | 33      | 4.98E+00 |
| AVR-Pia       | 3.29E+04                  | 8.82E-01           | 2.68E-05  | 774.1   | 15      | 4.58E+01 |
| AVR-Pii       | N.B.                      | N.B.               | N.B.      | N.B.    | N.B.    | N.B.     |
| <b>APB</b>    |                           |                    |           |         |         |          |
| AVR-PikD      | 5.30E+05                  | 1.67E-04           | 3.14E-10  | 40.4    | 5       | 7.77E-01 |
| AVR-PikC      | 3.35E+05                  | 9.87E-04           | 2.95E-09  | 31.6    | 2       | 4.52E-01 |
| AVR-PikF      | 6.23E+04                  | 1.02E-03           | 1.65E-08  | 49.4    | 2       | 5.64E-01 |
| AVR-Pia       | 2.33E+04                  | 7.66E-01           | 3.29E-05  | 502.3   | 33      | 6.42E+01 |
| AVR-Pii       | N.B.                      | N.B.               | N.B.      | N.B.    | N.B.    | N.B.     |

559

560 **Supplementary table 2. Data collection and refinement statistics**

| <b>APB/AVR-PikF</b>                    |                            |
|----------------------------------------|----------------------------|
| <b>Data collection statistics</b>      |                            |
| Wavelength (Å)                         | 0.979                      |
| Space group                            | $P 2_1 2_1 2_1$            |
| Cell dimensions<br><i>a, b, c</i> (Å)  | 31.91 57.90 76.66          |
| Resolution (Å)*                        | 46.24 – 1.22 (1.24 – 1.22) |
| $R_{\text{merge}}$ (%)                 | 6.9 (188.4)                |
| $I/\sigma I$                           | 14.5 (0.7)                 |
| Completeness (%)                       |                            |
| Overall                                | 99.4 (92.0)                |
| Anomalous                              | 99.0 (88.6)                |
| Unique reflections                     | 42985 (1915)               |
| Redundancy                             |                            |
| Overall                                | 11.5 (5.2)                 |
| Anomalous                              | 6.0 (2.7)                  |
| CC(1/2) (%)                            | 100 (32.4)                 |
| <b>Refinement and model statistics</b> |                            |
| Resolution (Å)                         | 46.24 – 1.22 (1.24 – 1.22) |
| $R_{\text{work}}/R_{\text{free}}$ (%)  | 14.9 / 20.2                |
| No. atoms                              | 1516                       |
| Protein                                | 1324                       |
| Ligand                                 | 9                          |
| Ion                                    | 2                          |
| Water                                  | 181                        |
| B-factors                              |                            |
| Protein                                | 18.0                       |
| Ligand                                 | 33.6                       |
| Ion                                    | 22.1                       |
| Water                                  | 27.2                       |
| R.m.s deviations                       |                            |
| Bond lengths (Å)                       | 0.0129                     |
| Bond angles (°)                        | 1.88                       |
| Ramachandran plot (%)**                |                            |
| Favoured                               | 97.50                      |
| Allowed                                | 1.88                       |
| Outliers                               | 0.62                       |
| MolProbity Score                       | 1.48                       |

561 \*The highest resolution shell is shown in parenthesis.

562 \*\*As calculated by MolProbity

563



564 **Materials and Methods**

565 **Key resources table**

| <b>Reagent type (species) or resource</b> | <b>Designation</b>                             | <b>Source or reference</b>      | <b>Identifiers</b> | <b>Additional Information</b> |
|-------------------------------------------|------------------------------------------------|---------------------------------|--------------------|-------------------------------|
| Recombinant DNA reagent                   | pICH47742                                      | Addgene; (Engler et al., 2014)  |                    |                               |
| Recombinant DNA reagent                   | pICSL01005                                     | Addgene; (Engler et al., 2014)  |                    |                               |
| Recombinant DNA reagent                   | Pikm-1 DOM2 acceptor                           | This paper                      |                    | To create Pikm-1 chimeras     |
| Recombinant DNA reagent                   | pICH47751                                      | Addgene; (Engler et al., 2014)  |                    |                               |
| Recombinant DNA reagent                   | pPGN-C                                         | Addgene; (Bentham et al., 2021) |                    |                               |
| Recombinant DNA reagent                   | pPGC-K                                         | Addgene; (Bentham et al., 2021) |                    |                               |
| Recombinant DNA reagent                   | pICSL4723                                      | Addgene; (Engler et al., 2014)  |                    |                               |
| Commercial assay or kit                   | ANTI-FLAG M2 Affinity Magnetic Beads           | Sigma (Merk)                    | A2220              |                               |
| Commercial assay or kit                   | Series S Sensor Chip CM5                       | Cytiva                          | 29104988           |                               |
| Antibody                                  | Anti-FLAG M2 antibody (mouse monoclonal)       | Sigma (Merk)                    | Cat. #F1804        | Used diluted (1:5000)         |
| Antibody                                  | Anti-MYC (9E10) (mouse monoclonal)             | Santa Cruz Biotechnology        | sc-40              | Used diluted (1:3000)         |
| Antibody                                  | Anti-mouse IgG HRP conjugate                   | Promega                         | Cat. #W4021        | Used diluted (1:10000)        |
| Commercial assay or kit                   | ECL extreme Lumiblu Western Blotting Substrate | Abcam                           | Ab270517           |                               |

---

|                         |                                                 |                                              |        |
|-------------------------|-------------------------------------------------|----------------------------------------------|--------|
| Commercial assay or kit | SG1 Screen, spare matrix crystallisation screen | Molecular Dimensions                         | MD1-88 |
| Software, algorithm     | besthr R package                                | De la Concepcion et al., 2019; MacLean, 2019 |        |
| Software, algorithm     | ggplot2 R package                               |                                              |        |
| Software, algorithm     | ggpubr R package                                |                                              |        |

---

566

### 567 **Gene cloning - in planta expression**

568 For expression in planta, full length Pk<sub>1</sub>p-1 and Pk<sub>1</sub>m-1, and relevant mutants, were cloned with a  
569 6xHIS/3xFLAG tag into the pICH47742 plasmid, full length Pk<sub>2</sub>p-2 and Pk<sub>2</sub>m-2 were cloned into  
570 pICH47751 with a C-terminal 6xHA tag and Pk<sub>2</sub>p-2<sup>D230E</sup> and Pk<sub>2</sub>m-2<sup>E230D</sup> mutants were generated by  
571 site-directed mutagenesis as previously described (De la Concepcion et al., 2021b, 2018).

### 572 **Gene cloning - Generation of in planta expression constructs**

573 To generate the Pk<sub>1</sub>m-1 DOM2 acceptor, the Pk<sub>1</sub>m sequence was domesticated of *BsaI* and *BbsI*  
574 restriction sites to allow compatibility with our Golden Gate cloning system and cloned into the  
575 Level 0 CDS(ns) pICSL01005 acceptor. Once domesticated, the position of the Pk<sub>1</sub>m HMA domain  
576 was substituted with pre-domesticated iGEM amilCP negative selection reporter cassettes internally  
577 flanked by outward pointing *Esp3I* sites to produce CAGA (5') and GATG (3') cloning overhangs.  
578 *Esp3I* was used to incorporate an iGEM RFP negative selection reporter cassette, internally flanked  
579 by outward pointing *BbsI* sites presenting CAGA (5') and GATG (3') cloning overhangs, allowing  
580 cloning of new domains via *BbsI* into the Pk<sub>1</sub>m-1 DOM2 acceptor in the analogous position to where  
581 the HMA domain was located.

582 The RGA5 HMA and APB mutant were cloned into the Pk<sub>1</sub>m-1 DOM2 acceptor via Golden Gate  
583 cloning with *BbsI* to assemble a full length Pk<sub>1</sub>m-1 receptor chimera. Full length Pk<sub>1</sub>m-1<sup>RGA5</sup> and

584 Pikm-1<sup>APB</sup> were subsequently cloned into pICH47742 via *Bsal*, with a C-terminal 6xHIS/3xFLAG  
585 tag.

586 RGA5/RGA4 along with P19 were assembled into the binary agrobacterium expression vector  
587 pICSL4723 (Engler et al., 2014) via *BbsI*. RGA4 was tagged with a C-terminal 6xHA tag and RGA5  
588 was left untagged to prevent effects on receptor function. Expression of RGA4 and RGA5 was driven  
589 by the *A. thaliana* actin and 2x35S promoters, respectively. For cell death assays, AVR-Pia was cloned  
590 untagged into pJK268c with P19, with expression driven by a 2x35S promoter. For co-IP assays, an  
591 N-terminally 4xMYC tagged AVR-Pia was cloned into pICH47752.

592 AVR-Pik effector variants used in this study were described previously (De la Concepcion et al.,  
593 2018). PWL2 was cloned into pICH47751 under a Ubi10 promoter and 35S terminator and C-terminal  
594 4xMYC tag via Golden Gate cloning.

#### 595 **Gene cloning - recombinant expression in *E. coli***

596 The RGA5, APB and Pikm-1 HMA domains as well as the AVR-Pik effector variants and AVR-Pia  
597 effector were cloned into pOPIN-GG vector pPGN-C (Bentham et al., 2021) with a cleavable N-  
598 terminal 6xHIS-GB1-3C tag via Golden Gate cloning with *Bsal*. AVR-Pii effector domain was cloned  
599 with a cleavable N-terminal MBP tag and an uncleavable C-terminal 6xHIS via In-fusion cloning  
600 into pOPINE (Berrow et al., 2007). For co-expression with the APB HMA for crystallography studies,  
601 AVR-PikF was cloned into pPGC-K (Bentham et al., 2021) without a tag via Golden Gate cloning  
602 with *Bsal*.

#### 603 **In planta co-immunoprecipitation (co-IP)**

604 Transient gene expression in planta was performed by infiltrating 4 week old *N. benthamiana* plants  
605 with *A. tumefaciens* strain GV3101 (C58 (rif<sup>R</sup>) Ti pMP90 (pTiC58DT-DNA) (gent<sup>R</sup>) Nopaline (pSoup-  
606 tet<sup>R</sup>)), grown at 22-25°C with high light intensity. *A. tumefaciens* carrying NLRs and effectors were  
607 infiltrated at OD<sub>600</sub> 0.4 and 0.6, respectively, in agroinfiltration medium (10 mM MgCl<sub>2</sub>, 10 mM 2-(N-  
608 morpholine)-ethanesulfonic acid (MES), pH 5.6) with the addition of 150 μM acetosyringone.

609 Leaf tissue was collected 3 days post infiltrations (dpi) and frozen in liquid nitrogen before  
610 processing. Samples were ground to a fine powder in liquid nitrogen using a mortar and pestle  
611 before being mixed with two times weight/volume ice-cold Co-IP extraction buffer (25 mM Tris pH  
612 7.5, 150 mM NaCl, 1 mM EDTA, 10 % glycerol, 2 % w/v PVPP, 10 mM DTT, 1 x cComplete protease  
613 inhibitor tablet per 50 mL (Roche), 0.1 % Tween20). Samples were centrifuged at 4200 g at 4°C for 20  
614 min, and supernatant was passed through a 0.45 µm Ministart syringe filter. SDS-PAGE/Western  
615 blot analysis was used to identify proteins in the sample with use of anti-FLAG M2 antibody (Sigma)  
616 and anti-MYC antibody (Santa Cruz Biotechnology) for NLRs and effectors, respectively.

617 For immunoprecipitation, 2 mL of filtered plant extract was incubated with 30 µL of M2 anti-FLAG  
618 magnetic beads (Sigma) in a rotary mixer for 3 hrs at 4°C. The FLAG beads were separated from the  
619 supernatant with use of a magnetic rack to allow for the removal of the supernatant. The beads were  
620 then washed with 1 mL of IP buffer (25 mM Tris pH 7.5, 150 mM NaCl, 1 mM EDTA, 10 % glycerol,  
621 0.1 % Tween20). The FLAG beads were washed three times using this method. After washing, 30 µL  
622 of LDS Runblue sample buffer was added to the FLAG beads and incubated for 10 min at 70°C. The  
623 beads were then applied to a magnetic rack and the supernatant was loaded to SDS-PAGE gels and  
624 subsequently used for western blot analysis. PVDF membranes were probed with anti-FLAG M2  
625 and anti-MYC antibodies to detect NLRs and effectors, respectively.

#### 626 ***N. benthamiana* cell death assays and cell death scoring**

627 Cell death assays and scoring were performed as described previously (De la Concepcion et al.,  
628 2021). In brief, *N. benthamiana* tissue was infiltrated with *A. tumefaciens* GV3101 (C58 [rifR] Ti pMP90  
629 [pTiC58DT-DNA] [gentR] Nopaline [pSoup-tetR]) carrying NLRs and effectors at OD<sub>600</sub> 0.4 and 0.6  
630 respectively, and P19 at OD<sub>600</sub> 0.1. Leaves were imaged 5 dpi from the abaxial side for UV  
631 fluorescence images. Images shown are representative of three independent experiments with  
632 internal technical repeats. The cell death scoring was performed using the cell death index  
633 previously presented in Maqbool et al., 2015. Dot plots were generated using R 4.0.5  
634 (<https://www.r-project.org>) with the packages ggplot2 (Wickham, 2016). The size of the centre dot

635 at each cell death value is directly proportional to the number of replicates in the sample with that  
636 score. All individual data points are represented as dots. Statistical analysis was performed using  
637 estimation graphics (Ho et al., 2019) with the besthr R package (De la Concepcion et al., 2021b;  
638 MacLean, 2019) and can be found in Appendix 1.

### 639 **Protein expression and purification from *E. coli***

640 Expression vectors containing the 6xHIS-GB1-tagged effectors and HMA domains were  
641 transformed into *E. coli* SHuffle cells. Using an overnight culture for inoculum, 8 L of SHuffle cells  
642 were grown in autoinduction media (AIM) at 30°C to an OD<sub>600</sub> of 0.6 – 0.8 before the temperature  
643 was reduced to 18°C for overnight induction (Studier, 2005). Cells were pelleted by centrifugation  
644 at 5000 g for 10 mins and resuspended in lysis buffer (50 mM HEPES pH 8.0, 500 mM NaCl, 30 mM  
645 imidazole, 50 mM glycine and 5 % glycerol). Cell lysate was clarified by centrifugation at 45000 g for  
646 20 mins following disruption of the resuspended pellet by sonication. Proteins were purified from  
647 clarified lysate via Ni<sup>2+</sup> immobilised metal chromatography (IMAC) coupled with size-exclusion  
648 chromatography (SEC). The 6xHIS-GB1 tag was removed via overnight cleavage with 3C protease  
649 at 4°C before a final round of SEC using a buffer of 10 mM HEPES pH 8, 150 mM NaCl. Proteins  
650 were flash frozen in liquid nitrogen before storage at -80°C.

651 For co-expression of the APB/AVR-PikF complex, *E. coli* SHuffle cells were co-transformed with  
652 6xHIS-GB1-tagged APB HMA and untagged AVR-PikF and plated on dual resistance carbenicillin  
653 and kanamycin selection. Expression and purification of the complex was then performed as  
654 described above, using dual selection for growth in large scale cultures.

### 655 **Crystallization, x-ray data collection, structure solution and refinement.**

656 The APB/AVR-PikF complex was concentrated to 10 mg/mL in SEC buffer (10 mM. HEPES pH 8.0,  
657 150 mM NaCl) for crystallisation. Sitting drop, vapour diffusion crystallisation trials were set up in  
658 96-well plants using an Oryx Nano robot (Douglas Instruments). Crystallisation plates were  
659 incubated at 20°C. APB/AVR-PikF crystals appeared in the SG1™ Screen (Molecular Dimensions)

660 after 10 days in a 0.1 M BIS-TRIS pH 5.5, 25 % PEG 3350 condition. Crystals were harvested and snap  
661 frozen in liquid nitrogen prior to shipping.

662 Crystals of the APB/AVR-PikF complex diffracted to 1.3 Å and x-ray datasets were collected at the  
663 Diamond Light Source on the i04 beamline under proposal mx25108. The data were processed using  
664 the xia2 pipeline and AIMLESS as implemented in CCP4i2 (Winn et al., 2011). Using the structure  
665 of the OsHIPP19/AVR-PikF complex (PDB ID: 7B11) as a template, the structure of the APB/AVR-  
666 PikF complex was solved using molecular replacement with PHASER (McCoy et al., 2007). The final  
667 structure was obtained after iterative cycles of refinement using COOT and REFMAC (Emsley and  
668 Cowtan, 2004; Murshudov et al., 1997). Structure geometry was validated using the tools in COOT  
669 and MOLPROBITY (Chen et al., 2010; Emsley and Cowtan, 2004). Protein interface analyses were  
670 performed using QtPISA and ChimeraX (Krissinel and Henrick, 2007; Pettersen et al., 2021). Models  
671 are visualised using ChimeraX (Pettersen et al., 2021). X-ray diffraction data can be found in the  
672 Protein Data Bank (<https://www.ebi.ac.uk/pdbe/>) under the accession number 8B2R.

### 673 **Analytical size-exclusion chromatography**

674 150 µg of purified AVR-PikF was mixed with 150 µg of the RGA5 and APB HMA domains and  
675 incubated on ice for 30 mins before separation via SEC using a Superdex S75 10/300 GL size-  
676 exclusion column (Cytiva). As a negative control, 150 µg of AVR-PikF was run alone. HMA domains  
677 were not run separate from AVR-PikF due to low or no absorbance at A<sub>280</sub> resulting in no observable  
678 peak in the chromatogram. Chromatograms were visualised using the ggplot2 R library in R 4.0.5  
679 (Wickham, 2016).

### 680 **Biophysical analysis with surface plasmon resonance.**

681 Surface plasmon resonance was performed using a Biacore 8K (Cytiva). Purified HMA domains  
682 were immobilised on a Series S Sensor CM5 Chip (Cytiva) via amine-coupling using 0.4 M 1-ethyl-  
683 3-(3-dimethylaminopropyl)-carbodiimide (EDC) and 0.1 M N-hydroxysuccinimide (NHS) to  
684 activate the chip surface prior to binding of HMAs at two concentrations on different channels, a

685 high concentration (30 nM, ~2000 response units (RU)) and a low concentration (0.3 nM, ~200 RU)  
686 to allow for accurate measurement of affinity and kinetics of strong and weak interactors. 1 M  
687 ethanolamine-HCl pH 8.5 was then used to block the CM5 chip after coupling was completed.

688 Samples were run in HBS-EP+ running buffer (0.1 M HEPES, 1.5 M NaCl, 0.03 M EDTA and 0.5%  
689 v/v Tween20) and the chip was regenerated after each cycle with an ionic regeneration buffer (0.46  
690 M KSCN, 1.83 M MgCl<sub>2</sub>, 0.92 M urea, 1.83 M guanidine-HCl). Effectors were run over the chip at a  
691 flow rate of 100 µL/min; contact and dissociation time varied depending on the experiment (see  
692 below).

693 Where possible, we performed multicycle kinetics to assess the affinity and binding kinetics of the  
694 effectors for the HMA. For strong interactions (Pikm-1 HMA with AVR-PikD) we used serial  
695 dilutions of effectors from 50 nM – 0 nM, and for weak interactions we used serial dilutions of 50  
696 µM – 0 µM (AVR-Pia with RGA5 HMA, APB HMA and Pikm-1 HMA; AVR-PikC with RGA5 HMA  
697 and Pikm-1 HMA; AVR-PikF with RGA5 HMA and Pikm-1 HMA), with each concentration being  
698 performed in triplicate. Contact time and dissociation times for the experiment were set at 120 s.

699 For strong interactions we performed single-cycle kinetics due to the extremely slow dissociation  
700 rates of the effectors from the HMA domains, which interfered with accurate calculations of kinetic  
701 parameters and binding affinity. For single cycle kinetics, increasing concentrations of effector (0  
702 nM – 50 nM) were sequentially flowed over the HMA-bound sensor chip each with a contact time  
703 of 120 s before a single dissociation phase of 600 s. Each cycle was performed in triplicate.

704 SPR sensograms were analysed with the Biacore Insight Evaluation Software (Cytiva) and  
705 equilibrium dissociation constants ( $K_D$ ) values were calculated using a 1:1 binding model from a  
706 kinetic fit model. Residual graphs are generated from the subtraction of the experimental data from  
707 the fit model ( $\Delta\text{Fit} - \text{Exp}$ ). Sensograms and residual graphs were generated in R 4.0.5 using the  
708 ggplot2 R package (Wickham, 2016).

## 709 References

- 710 Adachi, H., Derevnina, L., Kamoun, S., 2019. NLR singletons, pairs, and networks: evolution,  
711 assembly, and regulation of the intracellular immunoreceptor circuitry of plants. *Curr Opin*  
712 *Plant Biol* 50, 121–131. <https://doi.org/10.1016/j.pbi.2019.04.007>
- 713 Baggs, E., Dagdas, G., Krasileva, K., 2017. NLR diversity, helpers and integrated domains: making  
714 sense of the NLR IDentity. *Current Opinion in Plant Biology*, 38 Biotic interactions 2017 38,  
715 59–67. <https://doi.org/10.1016/j.pbi.2017.04.012>
- 716 Bentham, A.R., De la Concepcion, J.C., Mukhi, N., Zdrzałek, R., Draeger, M., Gorenkin, D., Hughes,  
717 R.K., Banfield, M.J., 2020. A molecular roadmap to the plant immune system. *JBC* 295, 14916–  
718 14935. <https://doi.org/10.1074/jbc.REV120.010852>
- 719 Bentham, A.R., Youles, M., Mendel, M.N., Varden, F.A., Concepcion, J.C.D. la, Banfield, M.J., 2021.  
720 pOPIN-GG: A resource for modular assembly in protein expression vectors.  
721 <https://doi.org/10.1101/2021.08.10.455798>
- 722 Berrow, N.S., Alderton, D., Sainsbury, S., Nettleship, J., Assenberg, R., Rahman, N., Stuart, D.I.,  
723 Owens, R.J., 2007. A versatile ligation-independent cloning method suitable for high-  
724 throughput expression screening applications. *Nucleic Acids Res* 35, e45.  
725 <https://doi.org/10.1093/nar/gkm047>
- 726 Białas, A., Langner, T., Harant, A., Contreras, M.P., Stevenson, C.E., Lawson, D.M., Sklenar, J.,  
727 Kellner, R., Moscou, M.J., Terauchi, R., Banfield, M.J., Kamoun, S., 2021. Two NLR immune  
728 receptors acquired high-affinity binding to a fungal effector through convergent evolution  
729 of their integrated domain. *eLife* 10, e66961. <https://doi.org/10.7554/eLife.66961>
- 730 Białas, A., Zess, E.K., De la Concepcion, J.C., Franceschetti, M., Pennington, H.G., Yoshida, K.,  
731 Upson, J.L., Chanclud, E., Wu, C.-H., Langner, T., Maqbool, A., Varden, F.A., Derevnina, L.,  
732 Belhaj, K., Fujisaki, K., Saitoh, H., Terauchi, R., Banfield, M.J., Kamoun, S., 2018. Lessons in  
733 Effector and NLR Biology of Plant-Microbe Systems. *MPMI* 31, 34–45.  
734 <https://doi.org/10.1094/MPMI-08-17-0196-FI>
- 735 Bomblies, K., Lempe, J., Epple, P., Warthmann, N., Lanz, C., Dangl, J.L., Weigel, D., 2007.  
736 Autoimmune response as a mechanism for a Dobzhansky-Muller-type incompatibility  
737 syndrome in plants. *PLoS Biol* 5, e236. <https://doi.org/10.1371/journal.pbio.0050236>
- 738 Burdett, H., Kobe, B., Anderson, P.A., 2019. Animal NLRs continue to inform plant NLR structure  
739 and function. *Archives of Biochemistry and Biophysics*, *Inflammasomes: Intracellular*  
740 *mediators of immune defence* 670, 58–68. <https://doi.org/10.1016/j.abb.2019.05.001>
- 741 Calvo-Baltanás, V., Wang, J., Chae, E., 2021. Hybrid Incompatibility of the Plant Immune System:  
742 An Opposite Force to Heterosis Equilibrating Hybrid Performances. *Frontiers in Plant*  
743 *Science* 11.
- 744 Cesari, S., 2018. Multiple strategies for pathogen perception by plant immune receptors. *New*  
745 *Phytologist* 219, 17–24. <https://doi.org/10.1111/nph.14877>
- 746 Cesari, S., Bernoux, M., Moncuquet, P., Kroj, T., Dodds, P.N., 2014. A novel conserved mechanism  
747 for plant NLR protein pairs: the “integrated decoy” hypothesis. *Front Plant Sci* 5, 606.  
748 <https://doi.org/10.3389/fpls.2014.00606>
- 749 Cesari, S., Thilliez, G., Ribot, C., Chalvon, V., Michel, C., Jauneau, A., Rivas, S., Alaux, L., Kanzaki,  
750 H., Okuyama, Y., Morel, J.-B., Fournier, E., Tharreau, D., Terauchi, R., Kroj, T., 2013. The Rice



- 751 Resistance Protein Pair RGA4/RGA5 Recognizes the *Magnaporthe oryzae* Effectors AVR-  
752 Pia and AVR1-CO39 by Direct Binding. *The Plant Cell* 25, 1463–1481.  
753 <https://doi.org/10.1105/tpc.112.107201>
- 754 Cesari, S., Xi, Y., Declerck, N., Chalvon, V., Mammri, L., Pugnière, M., Henriquet, C., de Guillen, K.,  
755 Chochois, V., Padilla, A., Kroj, T., 2022. New recognition specificity in a plant immune  
756 receptor by molecular engineering of its integrated domain. *Nat Commun* 13, 1524.  
757 <https://doi.org/10.1038/s41467-022-29196-6>
- 758 Chae, E., Bomblies, K., Kim, S.-T., Karelina, D., Zaidem, M., Ossowski, S., Martín-Pizarro, C.,  
759 Laitinen, R.A.E., Rowan, B.A., Tenenboim, H., Lechner, S., Demar, M., Habring-Müller, A.,  
760 Lanz, C., Rättsch, G., Weigel, D., 2014. Species-wide genetic incompatibility analysis identifies  
761 immune genes as hot spots of deleterious epistasis. *Cell* 159, 1341–1351.  
762 <https://doi.org/10.1016/j.cell.2014.10.049>
- 763 Chen, V.B., Arendall, W.B., Headd, J.J., Keedy, D.A., Immormino, R.M., Kapral, G.J., Murray, L.W.,  
764 Richardson, J.S., Richardson, D.C., 2010. MolProbity: all-atom structure validation for  
765 macromolecular crystallography. *Acta Crystallogr D Biol Crystallogr* 66, 12–21.  
766 <https://doi.org/10.1107/S0907444909042073>
- 767 Costanzo, S., Jia, Y., 2010. Sequence variation at the rice blast resistance gene Pi-km locus:  
768 Implications for the development of allele specific markers. *Plant Science* 178, 523–530.  
769 <https://doi.org/10.1016/j.plantsci.2010.02.014>
- 770 De la Concepcion, J.C., Franceschetti, M., MacLean, D., Terauchi, R., Kamoun, S., Banfield, M.J., 2019.  
771 Protein engineering expands the effector recognition profile of a rice NLR immune receptor.  
772 *eLife* 8, e47713. <https://doi.org/10.7554/eLife.47713>
- 773 De la Concepcion, J.C., Franceschetti, M., Maqbool, A., Saitoh, H., Terauchi, R., Kamoun, S., Banfield,  
774 M.J., 2018. Polymorphic residues in rice NLRs expand binding and response to effectors of  
775 the blast pathogen. *Nature Plants* 4, 576–585. <https://doi.org/10.1038/s41477-018-0194-x>
- 776 De la Concepcion, J.C., Fujisaki, K., Bentham, A.R., Mireles, N.C., Hernandez, V.S. de M., Shimizu,  
777 M., Lawson, D.M., Kamoun, S., Terauchi, R., Banfield, M.J., 2022. Binding of a blast fungus  
778 Zinc-finger fold effector to a hydrophobic pocket in the host exocyst subunit Exo70  
779 modulates immune recognition in rice. <https://doi.org/10.1101/2022.06.18.496527>
- 780 De la Concepcion, J.C., Maidment, J.H.R., Longya, A., Xiao, G., Franceschetti, M., Banfield, M.J.,  
781 2021a. The allelic rice immune receptor Pikh confers extended resistance to strains of the  
782 blast fungus through a single polymorphism in the effector binding interface. *PLOS*  
783 *Pathogens* 17, e1009368. <https://doi.org/10.1371/journal.ppat.1009368>
- 784 De la Concepcion, J.C., Vega Benjumea, J., Bialas, A., Terauchi, R., Kamoun, S., Banfield, M.J., 2021b.  
785 Functional diversification gave rise to allelic specialization in a rice NLR immune receptor  
786 pair. *eLife* 10, e71662. <https://doi.org/10.7554/eLife.71662>
- 787 Emsley, P., Cowtan, K., 2004. Coot: model-building tools for molecular graphics. *Acta Crystallogr D*  
788 *Biol Crystallogr* 60, 2126–2132. <https://doi.org/10.1107/S0907444904019158>
- 789 Engler, C., Youles, M., Gruetzner, R., Ehnert, T.-M., Werner, S., Jones, J.D.G., Patron, N.J.,  
790 Marillonnet, S., 2014. A Golden Gate Modular Cloning Toolbox for Plants. *ACS Synth. Biol.*  
791 3, 839–843. <https://doi.org/10.1021/sb4001504>
- 792 Feehan, J.M., Castel, B., Bentham, A.R., Jones, J.D., 2020. Plant NLRs get by with a little help from  
793 their friends. *Curr Opin Plant Biol* 56, 99–108. <https://doi.org/10.1016/j.pbi.2020.04.006>

- 794 Fujisaki, K., Abe, Y., Kanzaki, E., Ito, K., Utsushi, H., Saitoh, H., Bialas, A., Banfield, M.J., Kamoun,  
795 S., Terauchi, R., 2017. An unconventional NOI/RIN4 domain of a rice NLR protein binds  
796 host EXO70 protein to confer fungal immunity. <https://doi.org/10.1101/239400>
- 797 Guo, L., Cesari, S., de Guillen, K., Chalvon, V., Mammri, L., Ma, M., Meusnier, I., Bonnot, F., Padilla,  
798 A., Peng, Y.-L., Liu, J., Kroj, T., 2018. Specific recognition of two MAX effectors by integrated  
799 HMA domains in plant immune receptors involves distinct binding surfaces. *Proc. Natl.*  
800 *Acad. Sci. U.S.A.* 115, 11637–11642. <https://doi.org/10.1073/pnas.1810705115>
- 801 Ho, J., Tumkaya, T., Aryal, S., Choi, H., Claridge-Chang, A., 2019. Moving beyond P values: data  
802 analysis with estimation graphics. *Nat Methods* 16, 565–566.  
803 <https://doi.org/10.1038/s41592-019-0470-3>
- 804 Jones, J.D.G., Vance, R.E., Dangl, J.L., 2016. Intracellular innate immune surveillance devices in  
805 plants and animals. *Science* 354, aaf6395. <https://doi.org/10.1126/science.aaf6395>
- 806 Jumper, J., Evans, R., Pritzel, A., Green, T., Figurnov, M., Ronneberger, O., Tunyasuvunakool, K.,  
807 Bates, R., Židek, A., Potapenko, A., Bridgland, A., Meyer, C., Kohl, S.A.A., Ballard, A.J.,  
808 Cowie, A., Romera-Paredes, B., Nikolov, S., Jain, R., Adler, J., Back, T., Petersen, S., Reiman,  
809 D., Clancy, E., Zielinski, M., Steinegger, M., Pacholska, M., Berghammer, T., Bodenstein, S.,  
810 Silver, D., Vinyals, O., Senior, A.W., Kavukcuoglu, K., Kohli, P., Hassabis, D., 2021. Highly  
811 accurate protein structure prediction with AlphaFold. *Nature* 596, 583–589.  
812 <https://doi.org/10.1038/s41586-021-03819-2>
- 813 Kanzaki, H., Yoshida, K., Saitoh, H., Fujisaki, K., Hirabuchi, A., Alaux, L., Fournier, E., Tharreau, D.,  
814 Terauchi, R., 2012. Arms race co-evolution of *Magnaporthe oryzae* AVR-Pik and rice Pik  
815 genes driven by their physical interactions. *Plant J* 72, 894–907.  
816 <https://doi.org/10.1111/j.1365-313X.2012.05110.x>
- 817 Kourelis, J., Adachi, H., 2022. Activation and Regulation of NLR Immune Receptor Networks. *Plant*  
818 *and Cell Physiology* pccac116. <https://doi.org/10.1093/pcp/pccac116>
- 819 Kourelis, J., Marchal, C., Kamoun, S., 2021. NLR immune receptor-nanobody fusions confer plant  
820 disease resistance. <https://doi.org/10.1101/2021.10.24.465418>
- 821 Krissinel, E., Henrick, K., 2007. Inference of macromolecular assemblies from crystalline state. *J Mol*  
822 *Biol* 372, 774–797. <https://doi.org/10.1016/j.jmb.2007.05.022>
- 823 Kroj, T., Chanclud, E., Michel-Romiti, C., Grand, X., Morel, J.-B., 2016. Integration of decoy domains  
824 derived from protein targets of pathogen effectors into plant immune receptors is  
825 widespread. *New Phytologist* 210, 618–626. <https://doi.org/10.1111/nph.13869>
- 826 Le Roux, C., Huet, G., Jauneau, A., Camborde, L., Trémousaygue, D., Kraut, A., Zhou, B., Levailant,  
827 M., Adachi, H., Yoshioka, H., Raffaele, S., Berthomé, R., Couté, Y., Parker, J.E., Deslandes, L.,  
828 2015. A Receptor Pair with an Integrated Decoy Converts Pathogen Disabling of  
829 Transcription Factors to Immunity. *Cell* 161, 1074–1088.  
830 <https://doi.org/10.1016/j.cell.2015.04.025>
- 831 Liu, Y., Zhang, X., Yuan, G., Wang, D., Zheng, Y., Ma, M., Guo, L., Bhadauria, V., Peng, Y.-L., Liu,  
832 J., 2021. A designer rice NLR immune receptor confers resistance to the rice blast fungus  
833 carrying noncorresponding avirulence effectors. *Proceedings of the National Academy of*  
834 *Sciences* 118, e2110751118. <https://doi.org/10.1073/pnas.2110751118>

- 835 Lüdke, D., Yan, Q., Rohmann, P.F.W., Wiermer, M., 2022. NLR we there yet? Nucleocytoplasmic  
836 coordination of NLR-mediated immunity. *New Phytologist* n/a.  
837 <https://doi.org/10.1111/nph.18359>
- 838 MacLean, D., 2019. TeamMacLean/besthr: Initial Release. <https://doi.org/10.5281/zenodo.3374507>
- 839 Maidment, J.H.R., Franceschetti, M., Maqbool, A., Saitoh, H., Jantasuriyarat, C., Kamoun, S.,  
840 Terauchi, R., Banfield, M.J., 2021. Multiple variants of the fungal effector AVR-Pik bind the  
841 HMA domain of the rice protein OsHIPP19, providing a foundation to engineer plant  
842 defense. *Journal of Biological Chemistry* 296. <https://doi.org/10.1016/j.jbc.2021.100371>
- 843 Maidment, J.H.R., Shimizu, M., Vera, S., Franceschetti, M., Longya, A., Stevenson, C.E.M.,  
844 Concepcion, J.D. la, Bialas, A., Kamoun, S., Terauchi, R., Banfield, M.J., 2022. Effector target-  
845 guided engineering of an integrated domain expands the disease resistance profile of a rice  
846 NLR immune receptor. <https://doi.org/10.1101/2022.06.14.496076>
- 847 Maqbool, A., Saitoh, H., Franceschetti, M., Stevenson, C., Uemura, A., Kanzaki, H., Kamoun, S.,  
848 Terauchi, R., Banfield, M., 2015. Structural basis of pathogen recognition by an integrated  
849 HMA domain in a plant NLR immune receptor. *eLife* 4, e08709.  
850 <https://doi.org/10.7554/eLife.08709>
- 851 Marchal, C., Michalopoulou, V.A., Zou, Z., Cevik, V., Sarris, P.F., 2022. Show me your ID: NLR  
852 immune receptors with integrated domains in plants. *Essays in Biochemistry* EBC20210084.  
853 <https://doi.org/10.1042/EBC20210084>
- 854 Maruta, N., Burdett, H., Lim, B.Y.J., Hu, X., Desa, S., Manik, M.K., Kobe, B., 2022. Structural basis of  
855 NLR activation and innate immune signalling in plants. *Immunogenetics* 74, 5–26.  
856 <https://doi.org/10.1007/s00251-021-01242-5>
- 857 McCoy, A.J., Grosse-Kunstleve, R.W., Adams, P.D., Winn, M.D., Storoni, L.C., Read, R.J., 2007.  
858 Phaser crystallographic software. *J Appl Crystallogr* 40, 658–674.  
859 <https://doi.org/10.1107/S0021889807021206>
- 860 Mirdita, M., Schütze, K., Moriwaki, Y., Heo, L., Ovchinnikov, S., Steinegger, M., 2022. ColabFold:  
861 making protein folding accessible to all. *Nat Methods* 19, 679–682.  
862 <https://doi.org/10.1038/s41592-022-01488-1>
- 863 Monteiro, F., Nishimura, M.T., 2018. Structural, Functional, and Genomic Diversity of Plant NLR  
864 Proteins: An Evolved Resource for Rational Engineering of Plant Immunity. *Annu. Rev.*  
865 *Phytopathol.* 56, 243–267. <https://doi.org/10.1146/annurev-phyto-080417-045817>
- 866 Mukhi, N., Brown, H., Gorenkin, D., Ding, P., Bentham, A.R., Jones, J.D.G., Banfield, M.J., 2021.  
867 Perception of structurally distinct effectors by the integrated WRKY domain of a plant  
868 immune receptor. <https://doi.org/10.1101/2021.07.28.454147>
- 869 Murshudov, G.N., Vagin, A.A., Dodson, E.J., 1997. Refinement of macromolecular structures by the  
870 maximum-likelihood method. *Acta Crystallogr D Biol Crystallogr* 53, 240–255.  
871 <https://doi.org/10.1107/S09074444996012255>
- 872 Ordon, J., Martin, P., Erickson, J.L., Ferik, F., Balcke, G., Bonas, U., Stuttmann, J., 2021. Disentangling  
873 cause and consequence: genetic dissection of the DANGEROUS MIX2 risk locus, and  
874 activation of the DM2h NLR in autoimmunity. *The Plant Journal* 106, 1008–1023.  
875 <https://doi.org/10.1111/tpj.15215>

- 876 Ortiz, D., de Guillen, K., Cesari, S., Chalvon, V., Gracy, J., Padilla, A., Kroj, T., 2017. Recognition of  
877 the Magnaporthe oryzae Effector AVR-Pia by the Decoy Domain of the Rice NLR Immune  
878 Receptor RGA5[OPEN]. *Plant Cell* 29, 156–168. <https://doi.org/10.1105/tpc.16.00435>
- 879 Outram, M.A., Figueroa, M., Sperschneider, J., Williams, S.J., Dodds, P.N., 2022. Seeing is believing:  
880 Exploiting advances in structural biology to understand and engineer plant immunity.  
881 *Current Opinion in Plant Biology* 67, 102210. <https://doi.org/10.1016/j.pbi.2022.102210>
- 882 Pettersen, E.F., Goddard, T.D., Huang, C.C., Meng, E.C., Couch, G.S., Croll, T.I., Morris, J.H., Ferrin,  
883 T.E., 2021. UCSF ChimeraX: Structure visualization for researchers, educators, and  
884 developers. *Protein Sci* 30, 70–82. <https://doi.org/10.1002/pro.3943>
- 885 Sarris, P.F., Cevik, V., Dagdas, G., Jones, J.D.G., Krasileva, K.V., 2016. Comparative analysis of plant  
886 immune receptor architectures uncovers host proteins likely targeted by pathogens. *BMC*  
887 *Biology* 14, 8. <https://doi.org/10.1186/s12915-016-0228-7>
- 888 Studier, F.W., 2005. Protein production by auto-induction in high-density shaking cultures. *Protein*  
889 *Expression and Purification* 41, 207–234. <https://doi.org/10.1016/j.pep.2005.01.016>
- 890 Sugihara, Y., Abe, Y., Takagi, H., Abe, A., Shimizu, M., Ito, K., Kanzaki, E., Oikawa, K., Kourelis, J.,  
891 Langner, T., Win, J., Białas, A., Lüdke, D., Chuma, I., Saitoh, H., Kobayashi, M., Zheng, S.,  
892 Tosa, Y., Banfield, M.J., Kamoun, S., Terauchi, R., Fujisaki, K., 2022. Tangled gene-for-gene  
893 interactions mediate co-evolution of the rice NLR immune receptor Pik and blast fungus  
894 effector proteins. <https://doi.org/10.1101/2022.07.19.500555>
- 895 Takken, F.L.W., Goverse, A., 2012. How to build a pathogen detector: structural basis of NB-LRR  
896 function. *Curr Opin Plant Biol* 15, 375–384. <https://doi.org/10.1016/j.pbi.2012.05.001>
- 897 Tamborski, J., Seong, K., Liu, F., Staskawicz, B., Krasileva, K.V., 2022. Engineering of Sr33 and Sr50  
898 plant immune receptors to alter recognition specificity and autoactivity.  
899 <https://doi.org/10.1101/2022.03.05.483131>
- 900 Tran, D.T.N., Chung, E.-H., Habring-Müller, A., Demar, M., Schwab, R., Dangl, J.L., Weigel, D.,  
901 Chae, E., 2017. Activation of a Plant NLR Complex through Heteromeric Association with  
902 an Autoimmune Risk Variant of Another NLR. *Current Biology* 27, 1148–1160.  
903 <https://doi.org/10.1016/j.cub.2017.03.018>
- 904 Varden, F.A., Saitoh, H., Yoshino, K., Franceschetti, M., Kamoun, S., Terauchi, R., Banfield, M.J.,  
905 2019. Cross-reactivity of a rice NLR immune receptor to distinct effectors from the rice blast  
906 pathogen *Magnaporthe oryzae* provides partial disease resistance. *J Biol Chem* 294, 13006–  
907 13016. <https://doi.org/10.1074/jbc.RA119.007730>
- 908 Wickham, H., 2016. *ggplot2: Elegant Graphics for Data Analysis*. Springer-Verlag New York.
- 909 Winn, M.D., Ballard, C.C., Cowtan, K.D., Dodson, E.J., Emsley, P., Evans, P.R., Keegan, R.M.,  
910 Krissinel, E.B., Leslie, A.G.W., McCoy, A., McNicholas, S.J., Murshudov, G.N., Pannu, N.S.,  
911 Potterton, E.A., Powell, H.R., Read, R.J., Vagin, A., Wilson, K.S., 2011. Overview of the CCP4  
912 suite and current developments. *Acta Crystallogr D Biol Crystallogr* 67, 235–242.  
913 <https://doi.org/10.1107/S0907444910045749>
- 914 Wu, C.-H., Derevnina, L., Kamoun, S., 2018. Receptor networks underpin plant immunity. *Science*  
915 360, 1300–1301. <https://doi.org/10.1126/science.aat2623>

- 916 Zdrzałek, R., Kamoun, S., Terauchi, R., Saitoh, H., Banfield, M.J., 2020. The rice NLR pair Pikp-  
917 1/Pikp-2 initiates cell death through receptor cooperation rather than negative regulation.  
918 PLoS One 15, e0238616. <https://doi.org/10.1371/journal.pone.0238616>
- 919 Zhang, X., Liu, Y., Yuan, G., Wang, D., Zhu, T., Wu, X., Ma, M., Guo, L., Guo, H., Bhadauria, V., Liu,  
920 J., Peng, Y.-L., 2022. The effector recognition by synthetic sensor NLR receptors requires the  
921 concerted action of multiple interfaces within and outside the integrated domain.  
922 <https://doi.org/10.1101/2022.08.17.504349>
- 923 Zhang, Z.-M., Ma, K.-W., Gao, L., Hu, Z., Schwizer, S., Ma, W., Song, J., 2017. Mechanism of host  
924 substrate acetylation by a YopJ family effector. Nat Plants 3, 17115.  
925 <https://doi.org/10.1038/nplants.2017.115>
- 926

927 **Appendix 1. Statistical analysis of cell death scoring with besthr.**

928 Cell death scoring in this study was performed through qualitative measurement of cell death as  
929 determined by approximation of autofluorescence under UV light 5 dpi, as previously performed in  
930 De la Concepcion et al., 2019. The autofluorescence was compared to a previously established cell  
931 death scale (Maqbool et al., 2015). To analyse our cell death scoring, we used estimation methods  
932 (Ho et al., 2019) and visualised these with use of the besthr R package (MacLean, 2019) to generate  
933 estimation graphics.

934 Besthr compares the cell death scores of all samples and ranks them irrespective of sample then  
935 generates mean ranks for the control and test samples. A bootstrap process is then performed on the  
936 ranked test data in which samples of equal size to the experiment were replaced and a mean rank is  
937 calculated.

938 Rank means were calculated after 1000 bootstrap samples and a distribution of the mean ranks were  
939 plotted, with the 2.5 and 97.5 quantiles calculated and highlighted on the plotted distribution. If the  
940 mean of the control data is outside of the 2.5 or 97.5 quantile boundaries, the control and test means  
941 are considered to be different.

942 **References**

943 De la Concepcion, J.C., Franceschetti, M., MacLean, D., Terauchi, R., Kamoun, S., Banfield, M.J., 2019.  
944 Protein engineering expands the effector recognition profile of a rice NLR immune receptor. *eLife* 8,  
945 e47713. <https://doi.org/10.7554/eLife.47713>

946  
947 Ho, J., Tumkaya, T., Aryal, S., Choi, H., Claridge-Chang, A., 2019. Moving beyond P values: data  
948 analysis with estimation graphics. *Nat Methods* 16, 565–566. [https://doi.org/10.1038/s41592-019-](https://doi.org/10.1038/s41592-019-0470-3)  
949 [0470-3](https://doi.org/10.1038/s41592-019-0470-3)

950  
951 MacLean, D., 2019. TeamMacLean/besthr: Initial Release. Zenodo.  
952 <https://doi.org/10.5281/zenodo.3374507>

953

954 Maqbool, A., Saitoh, H., Franceschetti, M., Stevenson, C., Uemura, A., Kanzaki, H., Kamoun, S.,  
955 Terauchi, R., Banfield, M., 2015. Structural basis of pathogen recognition by an integrated HMA  
956 domain in a plant NLR immune receptor. *eLife* 4, e08709. <https://doi.org/10.7554/eLife.08709>  
957

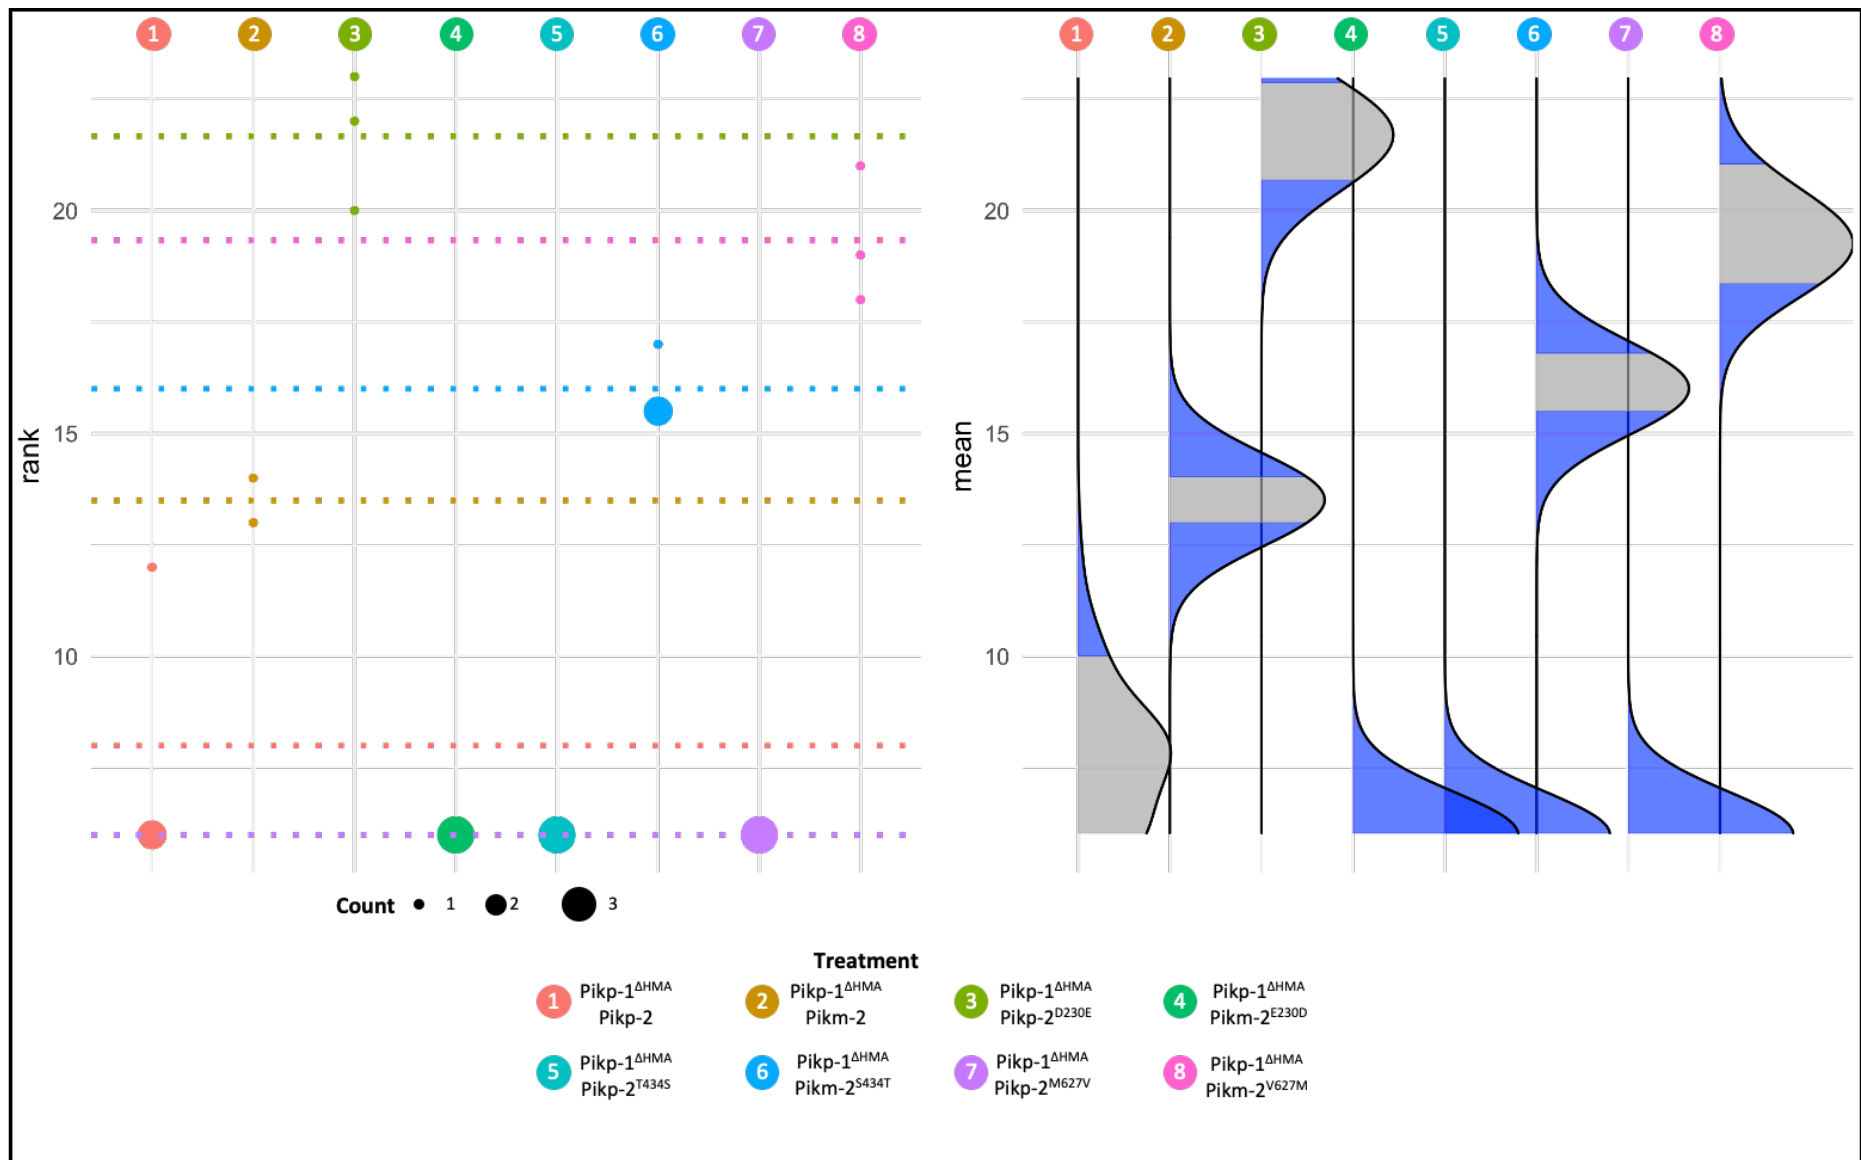

Appendix 1 A. Statistical analysis of cell death scoring from Fig 1.



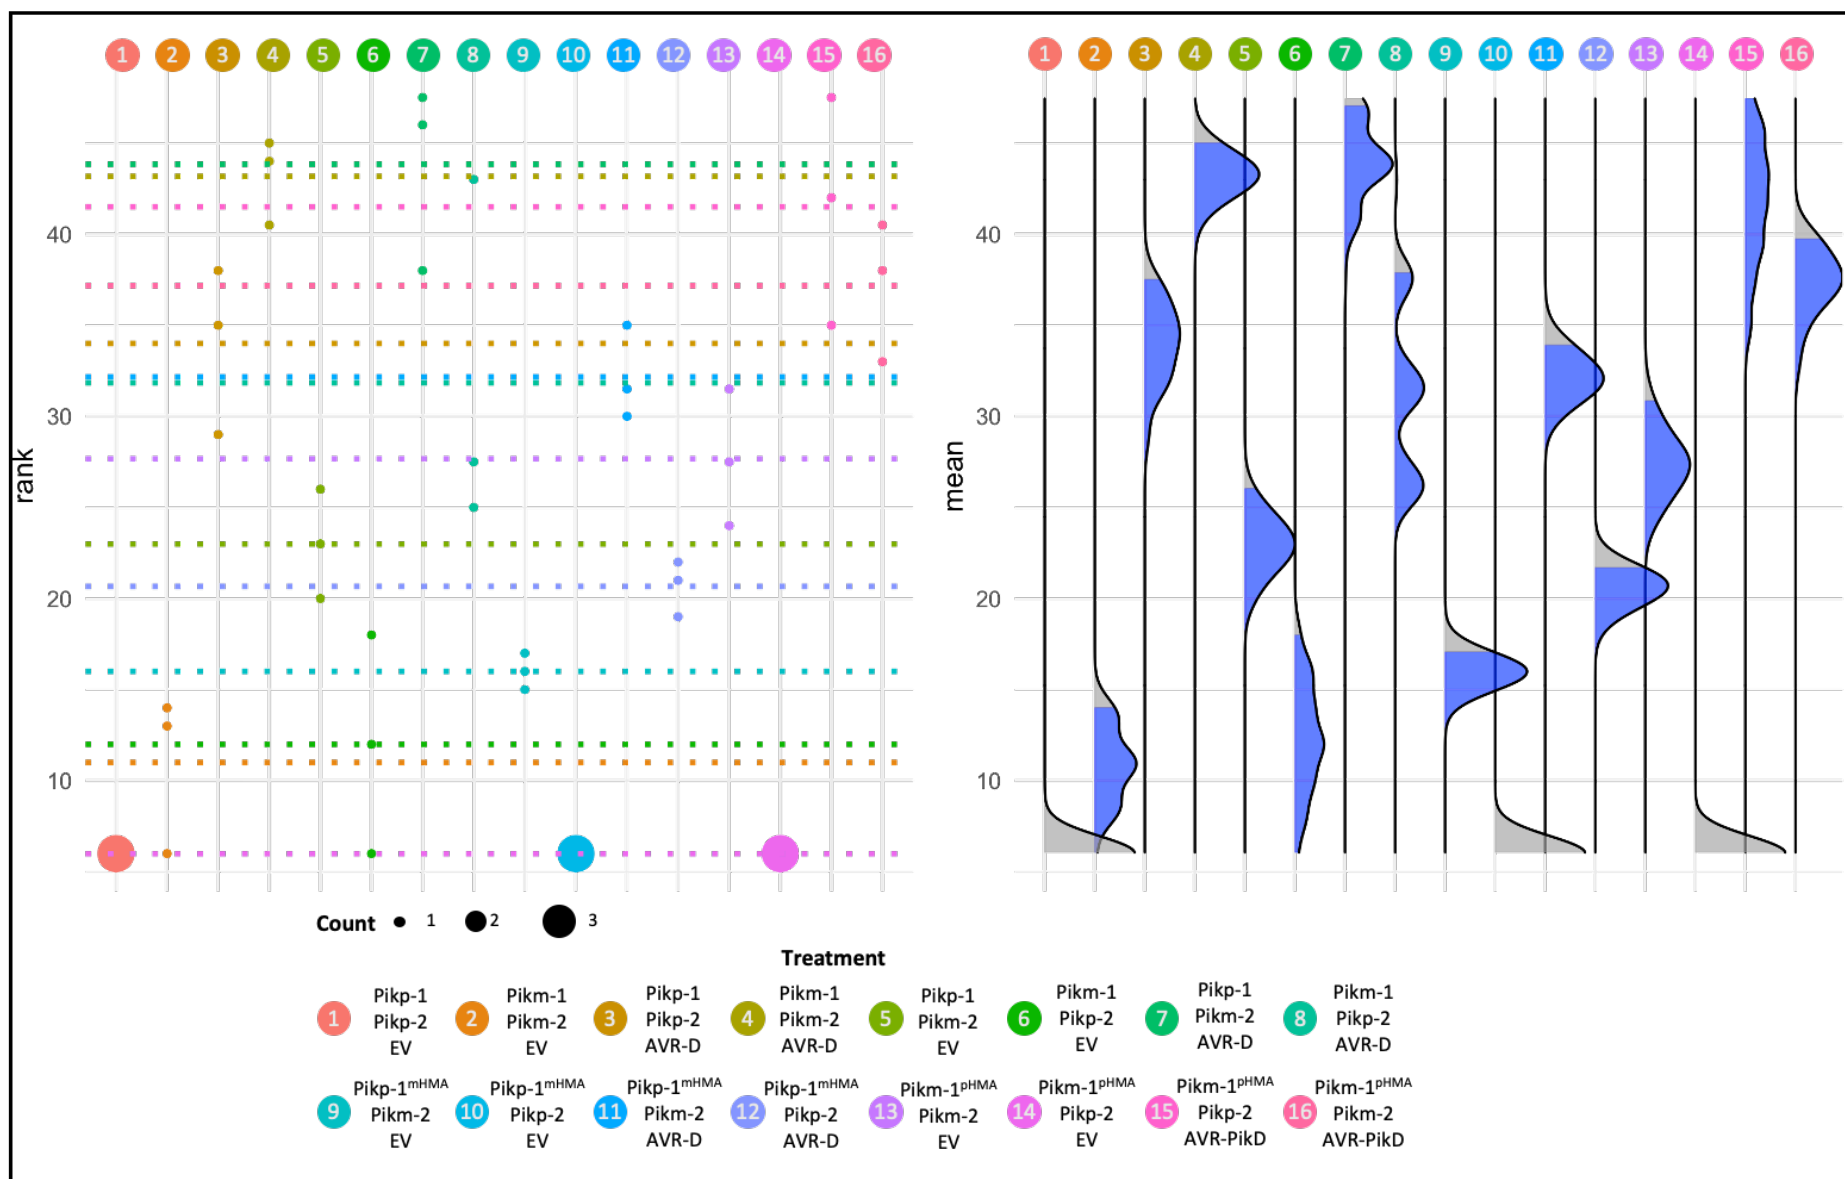

Appendix 1 B. Statistical analysis of cell death scoring from Fig S1 A.

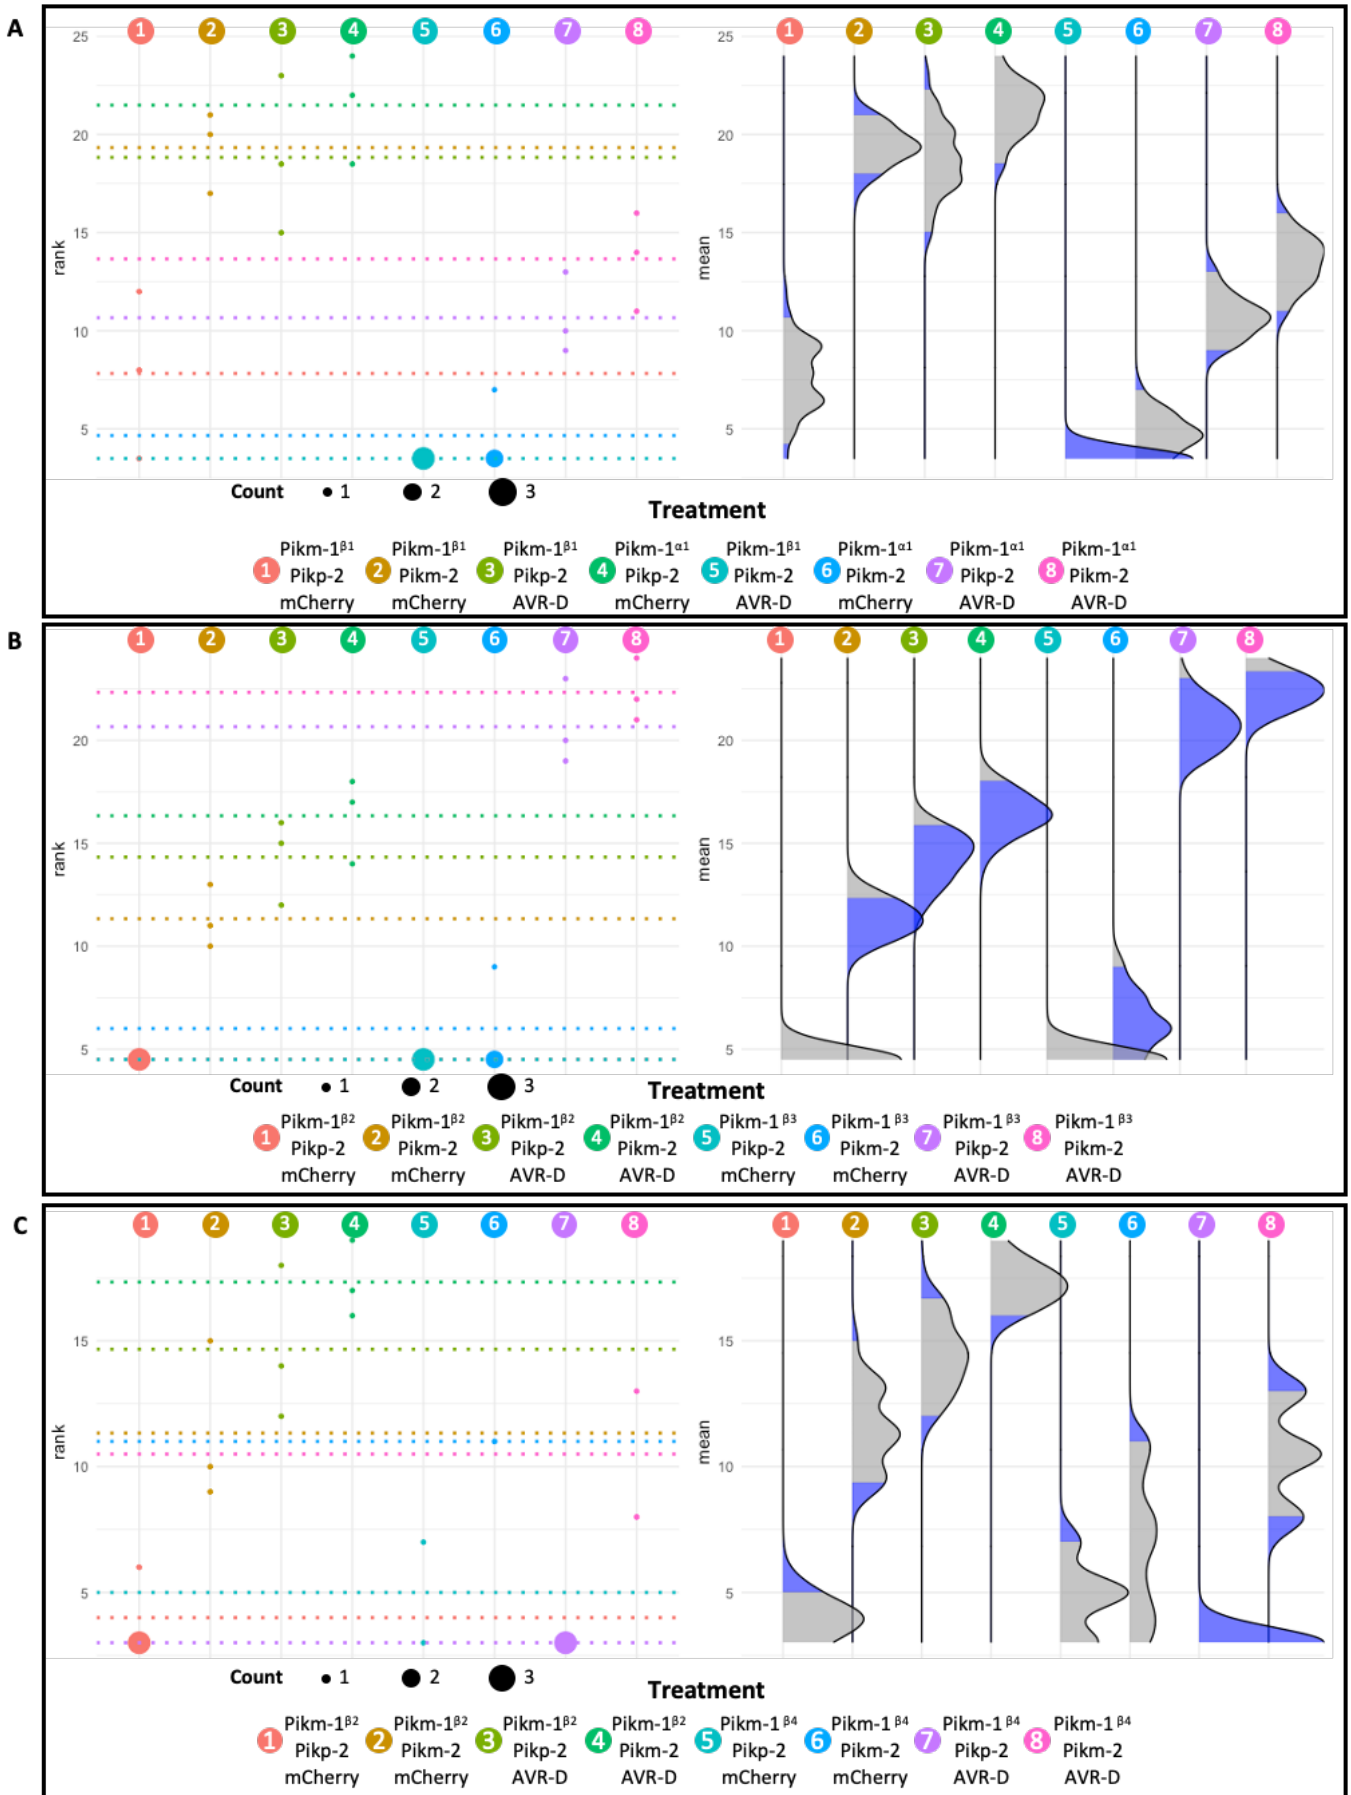

**Appendix 1 C. Statistical analysis of cell death scoring from Fig S1 B.** A) Chimeras of Pikm-1 with the  $\beta 1$  and  $\alpha 1$  secondary structures of Pikp-1 HMA B) Chimeras of Pikm-1 with the  $\beta 2$  and  $\beta 3$  structures of Pikp-1 C) Chimeras of Pikm-1 with the  $\alpha 2$  and  $\beta 4$  secondary structures of Pikp-1 HMA

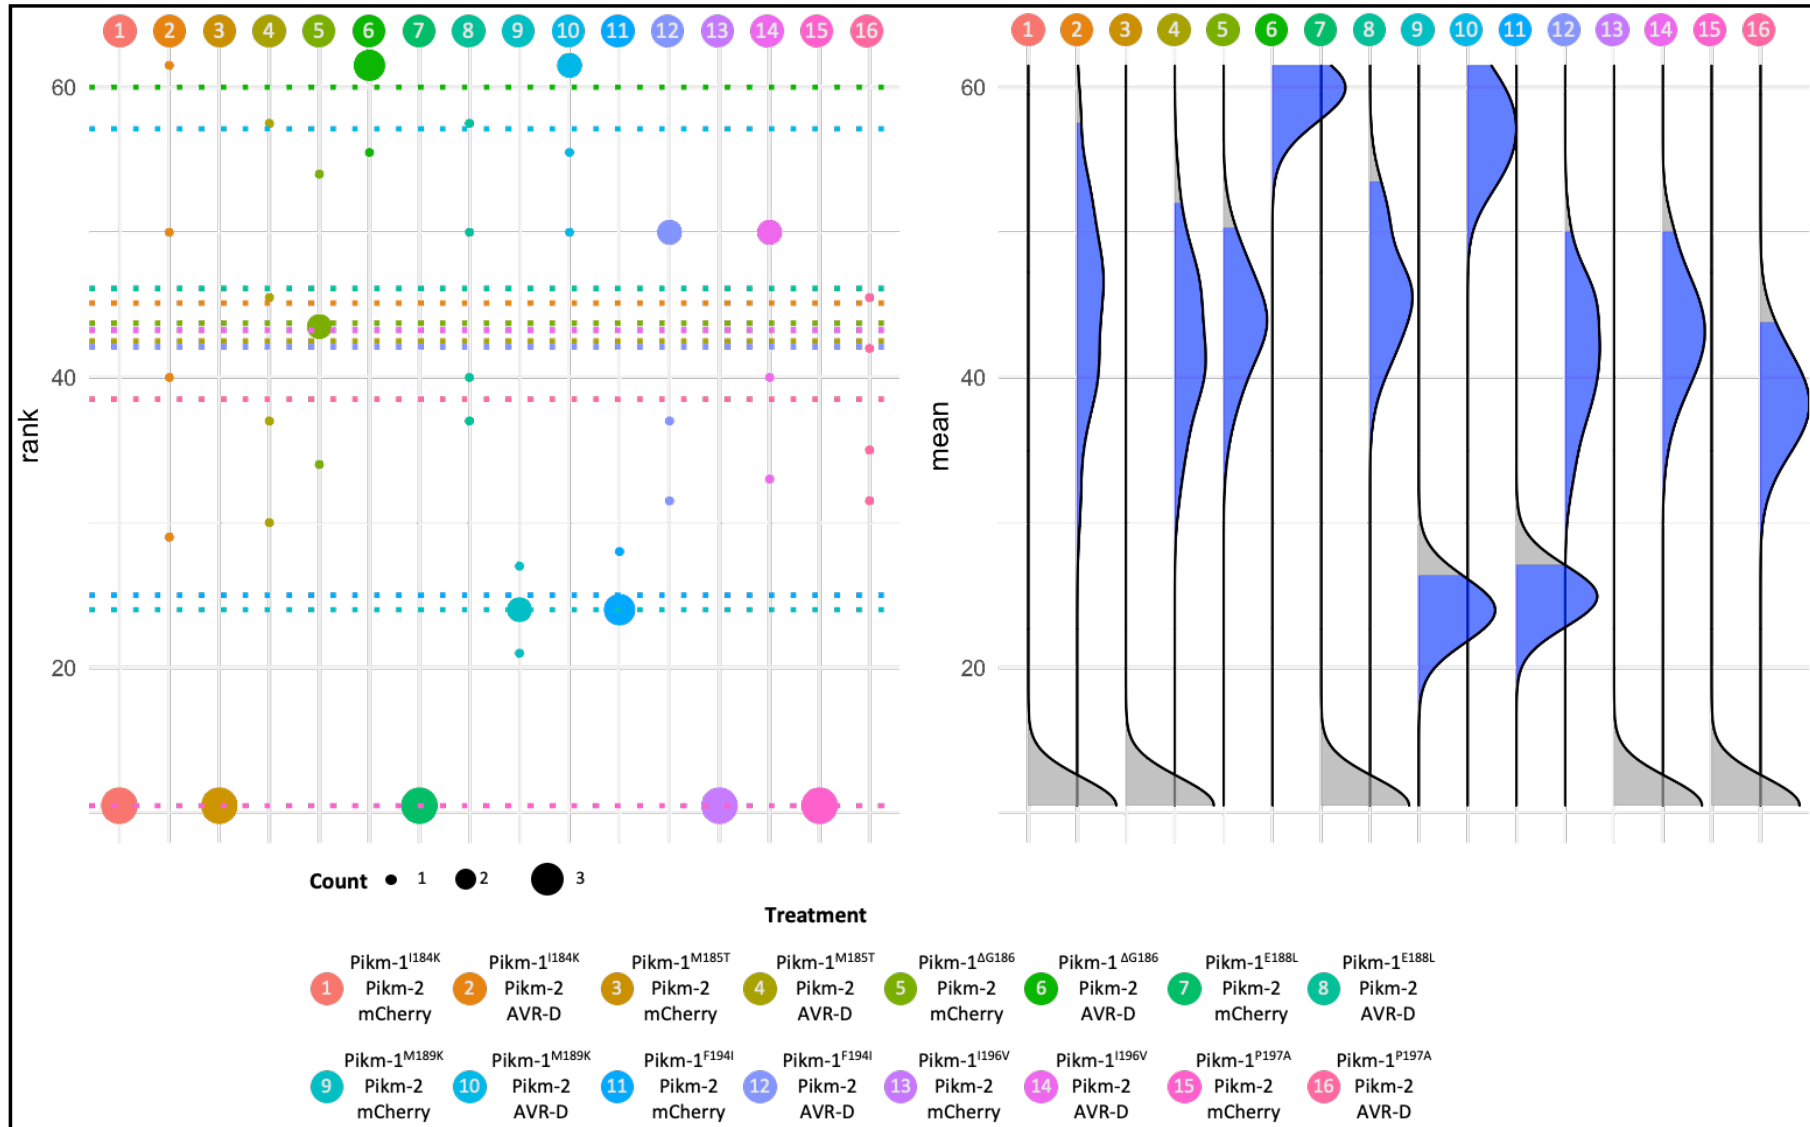

Appendix 1 D. Statistical analysis of cell death scoring from Fig S3 A.

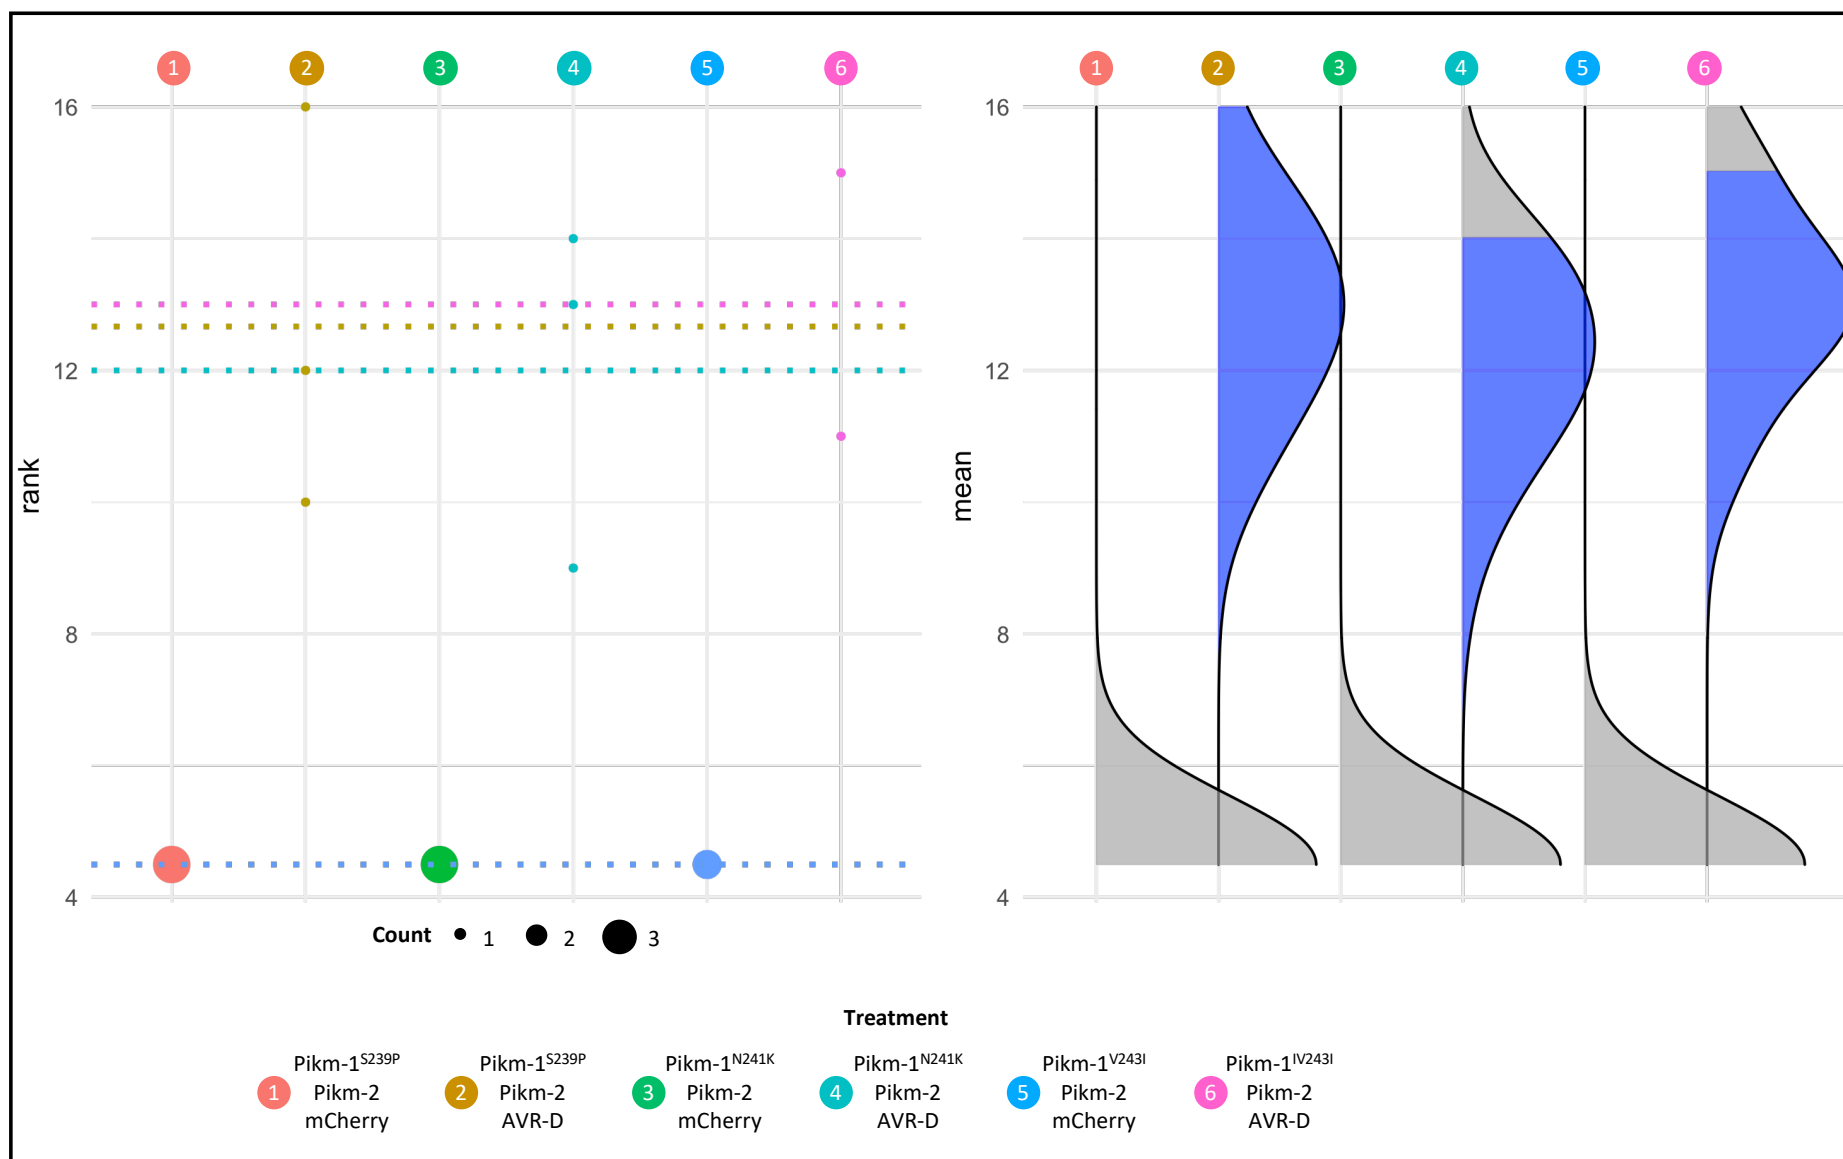

Appendix 1 E. Statistical analysis of cell death scoring from Fig S3 B.

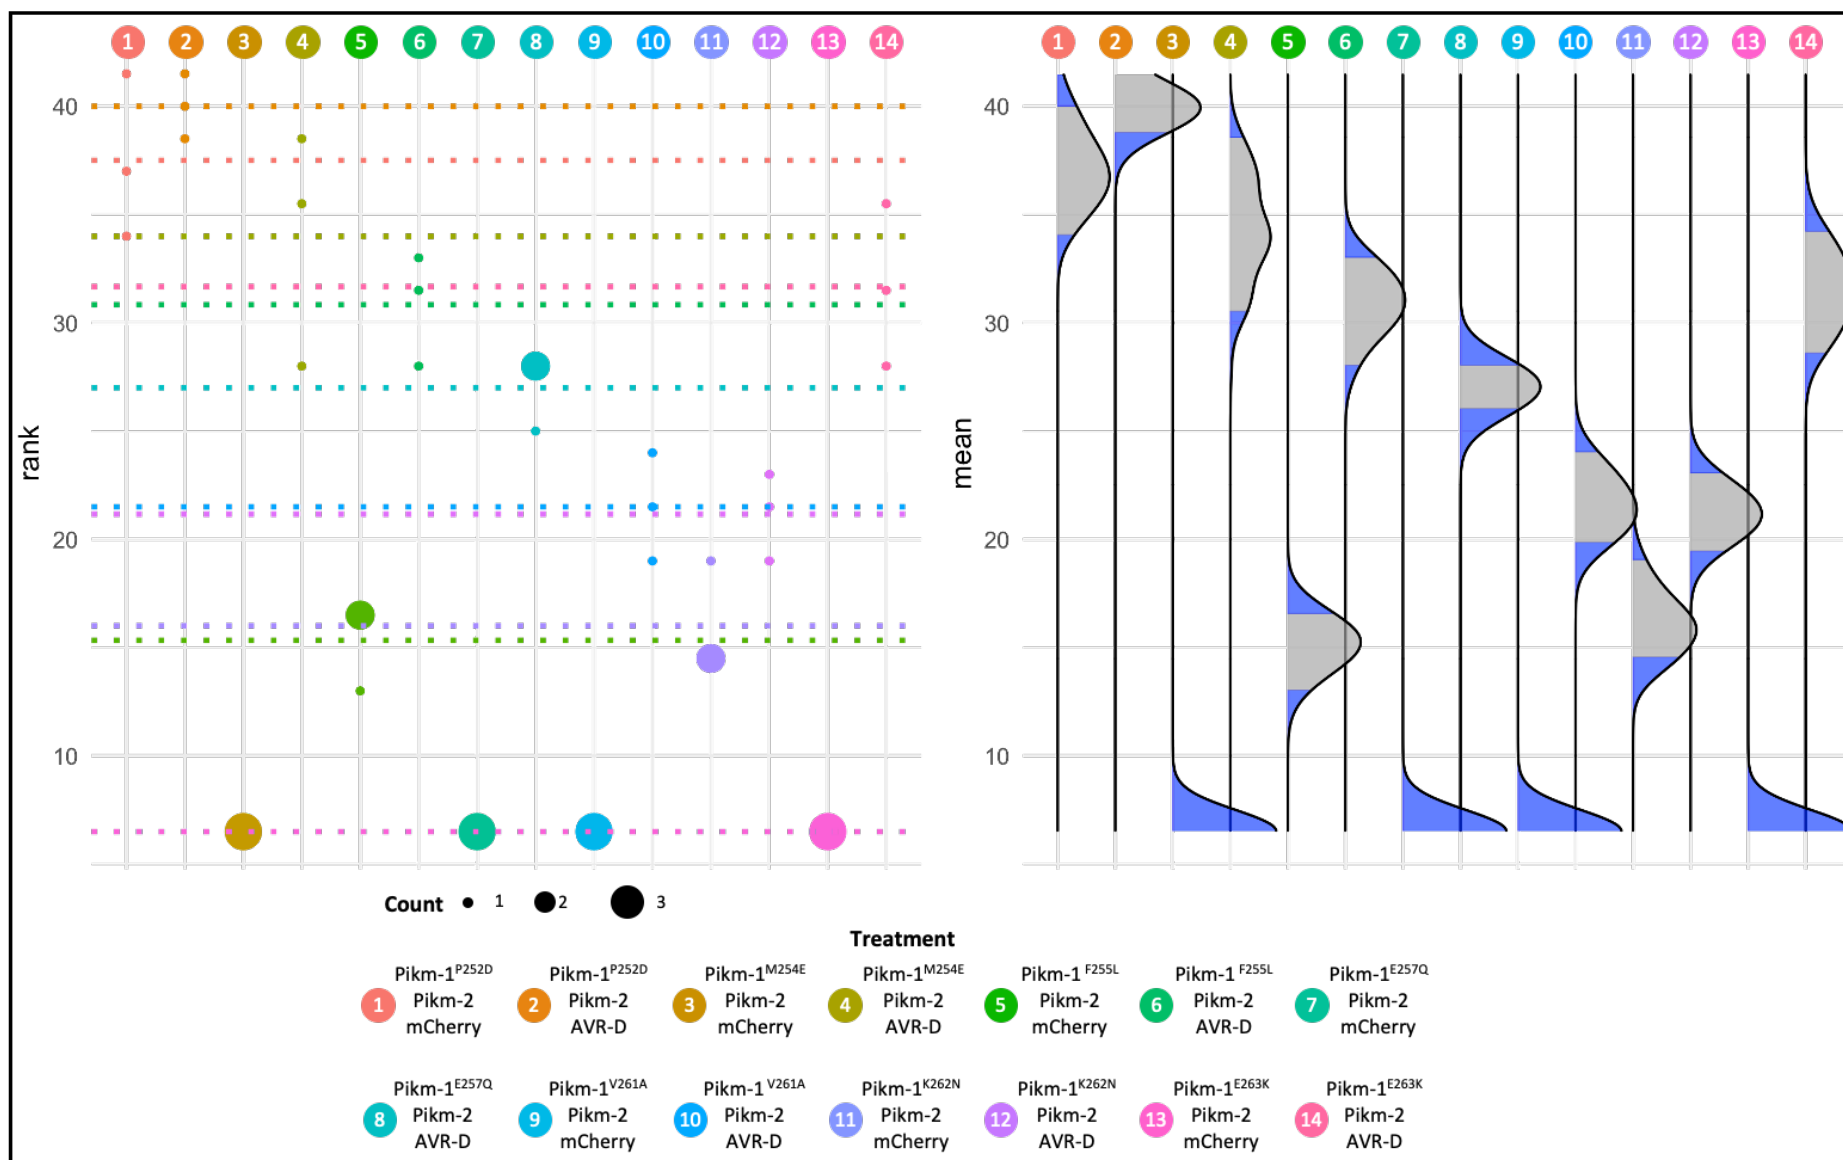

Appendix 1 F. Statistical analysis of cell death scoring from Fig S3 C.

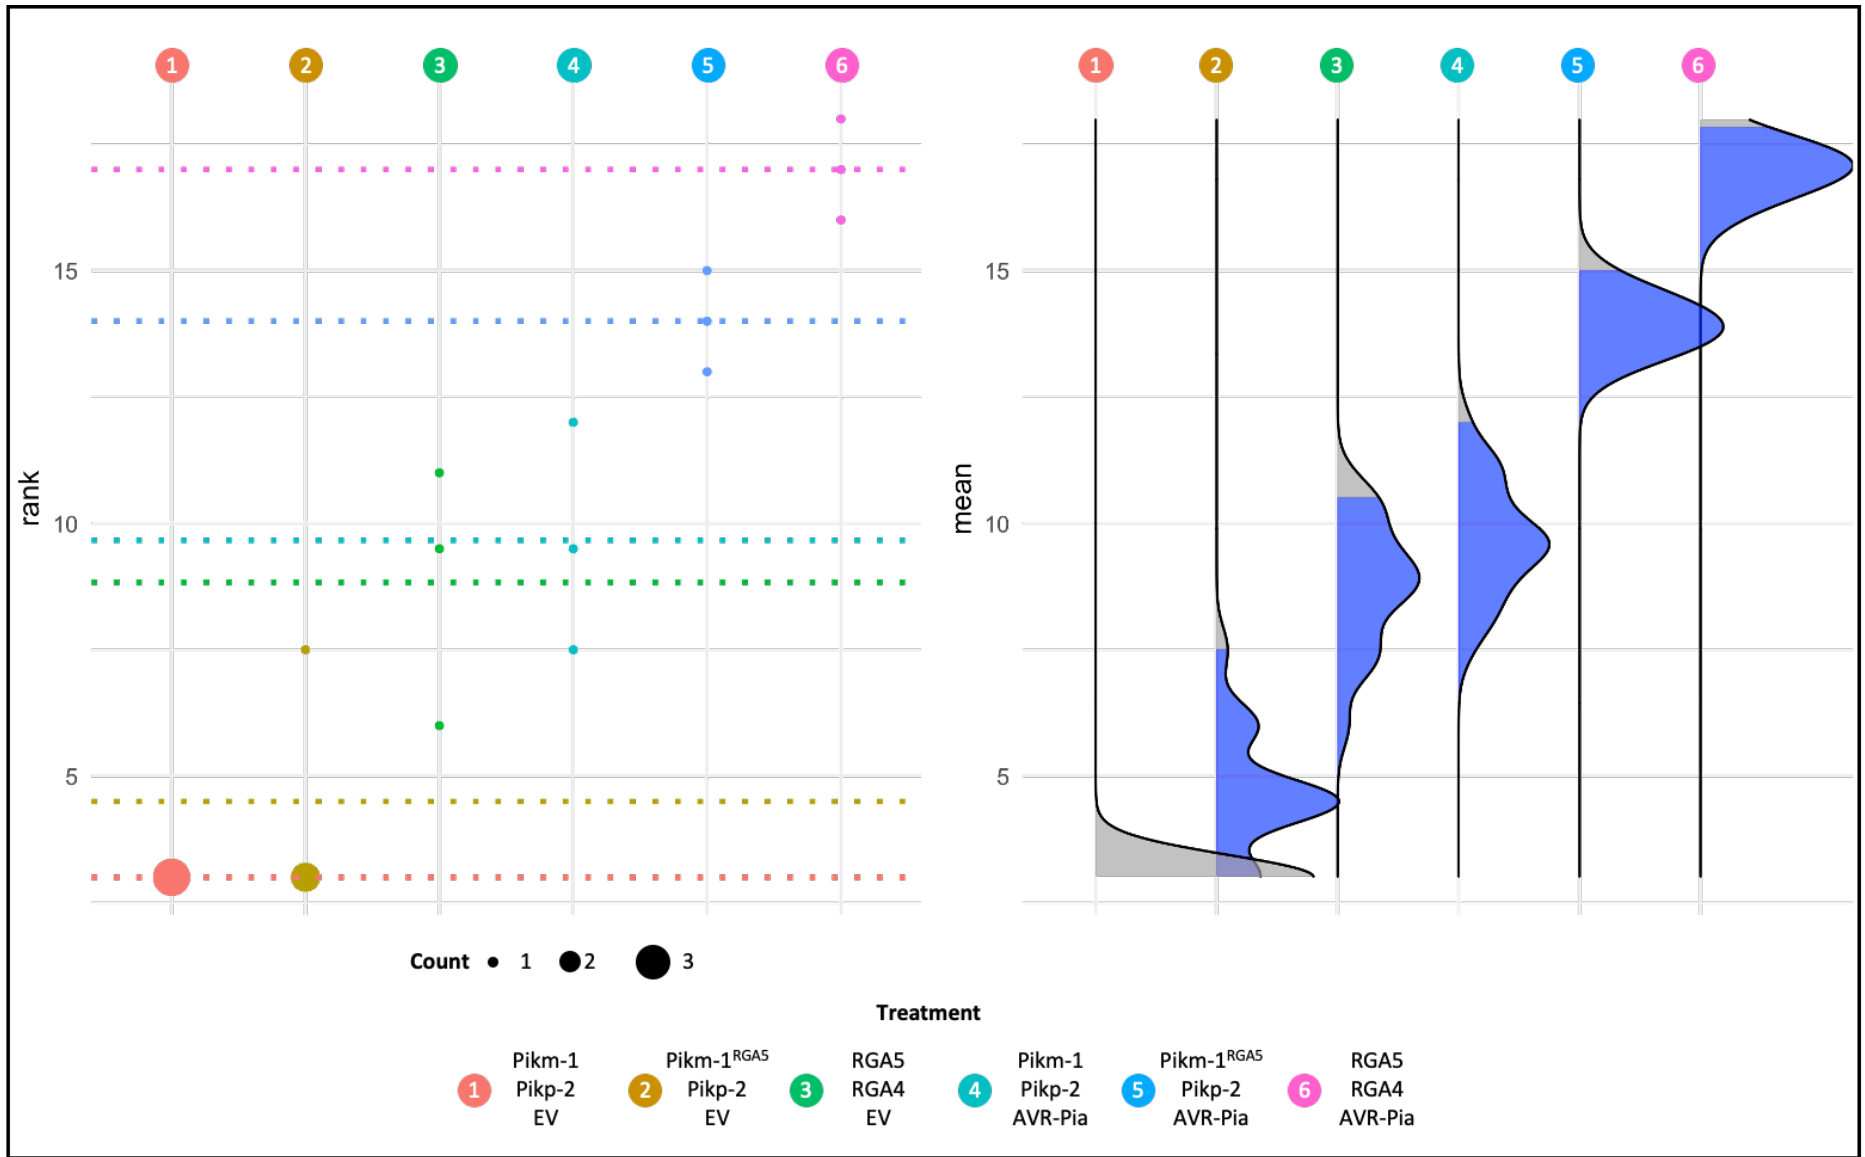

Appendix 1 G. Statistical analysis of cell death scoring from Fig 3 B.

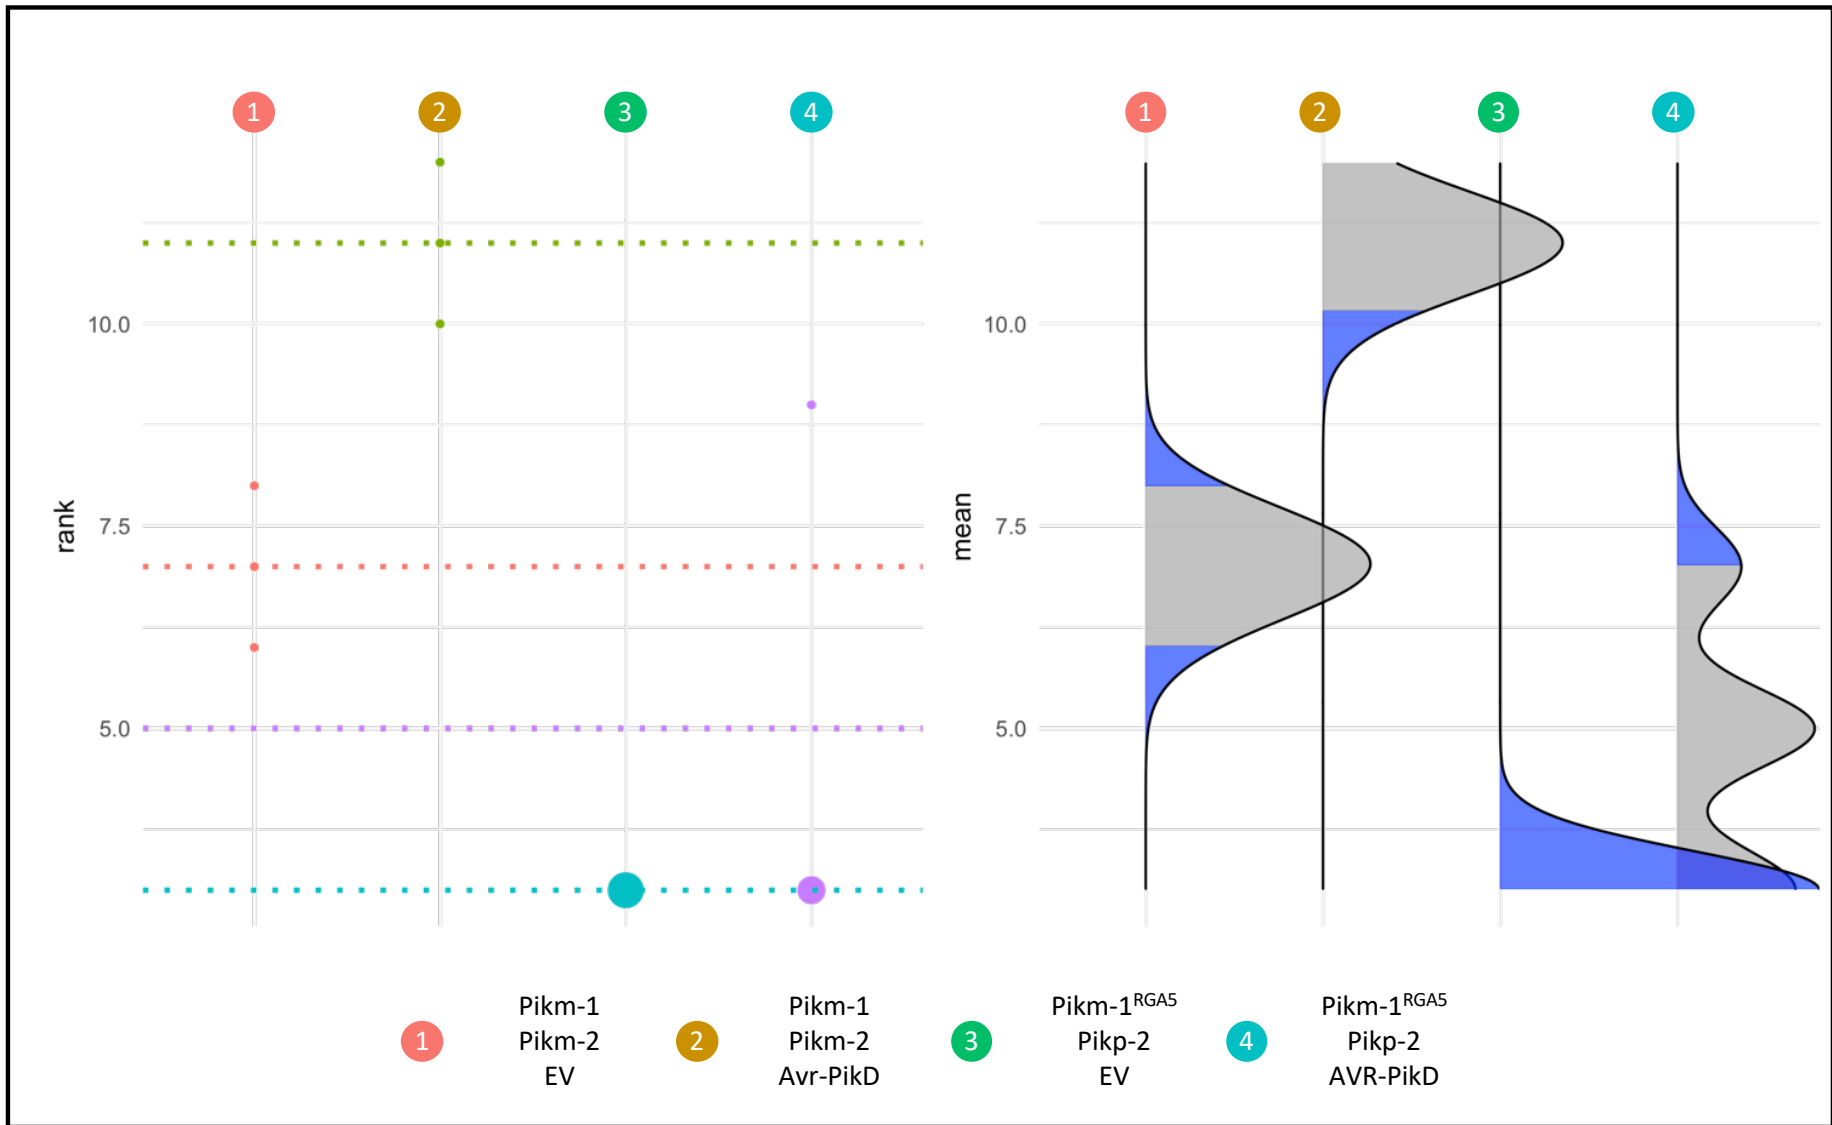

Appendix 1 H. Statistical analysis of cell death scoring from Fig S4.

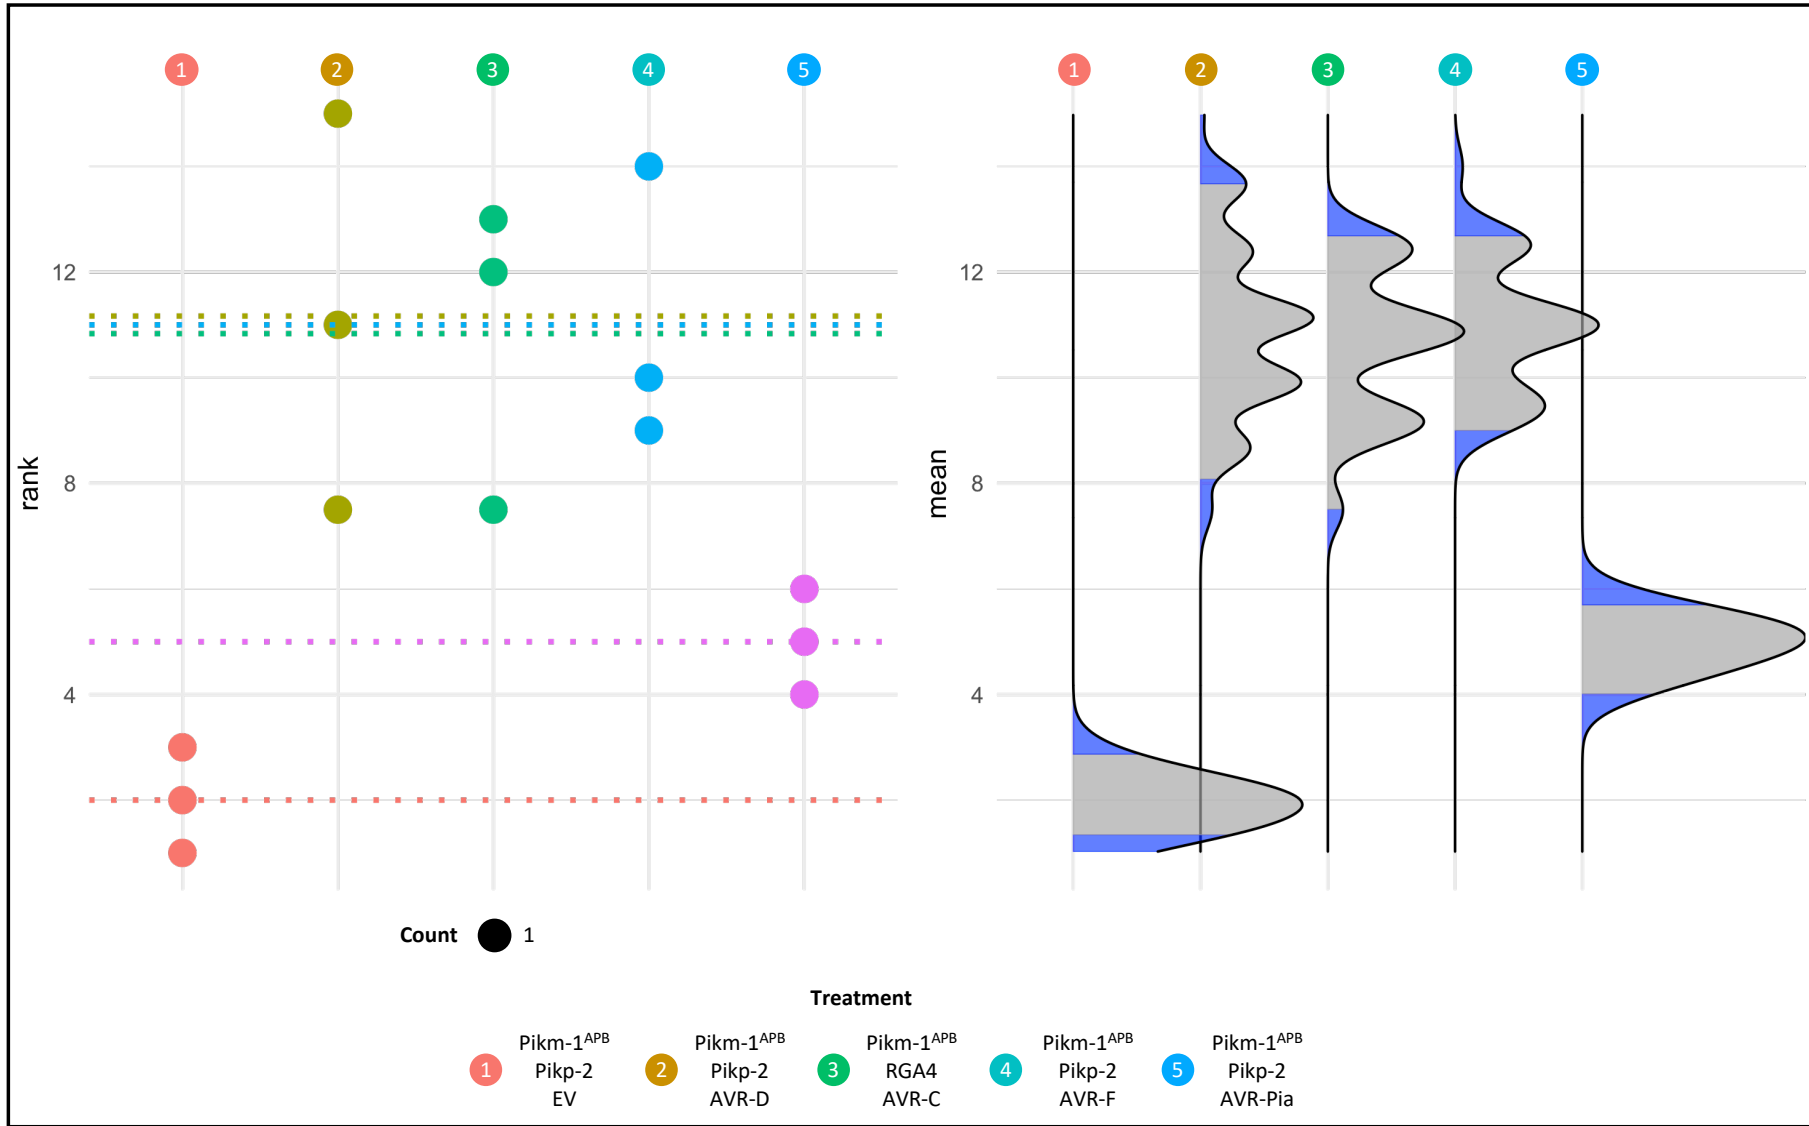

Appendix 1 I. Statistical analysis of cell death scoring from Fig 4 B.
